# Supplementary material for: Potential involvement of Streptococcus mutans possessing collagen binding protein Cnm in infective endocarditis
Source: PubMed Central journal article supplement (PMC7645802; doi:10.1038/s41598-020-75933-6), 2020-11-05
Supplement: 41598_2020_75933_MOESM1_ESM.pdf [file 41598_2020_75933_MOESM1_ESM.pdf]

**Potential involvement of *Streptococcus mutans* possessing collagen binding protein Cnm in infective endocarditis**

Ryota Nomura, Masatoshi Otsugu, Masakazu Hamada, Saaya Matayoshi, Noboru Teramoto, Naoki Iwashita, Shuhei Naka, Michiyo Matsumoto-Nakano, Kazuhiko Nakano

Supplementary Table 1. Changes in gene expression of TW295CND with respect to TW295.

| Sequence ID | Sequence Code  | Primary Sequence | Sequence Description                                                      | Accession #     | Log(Ratio) | Fold Change | P-value  |
|-------------|----------------|------------------|---------------------------------------------------------------------------|-----------------|------------|-------------|----------|
| 2313823     | A_33_P3754922  | RNU11            | BP873537 Sugano cDNA library, embryonal kidney Homo sapiens               | BP873537        | 2          | 100         | 3.30E-23 |
| 2313224     | A_33_P3403270  |                  | coiled-coil domain containing 33 [Source:HGNC Symbol;Acc:2655; CN265765   |                 | 2          | 100         | 6.45E-23 |
| 1145348     | A_23_P82099    | NOX3             | Homo sapiens NADPH oxidase 3 (NOX3), mRNA [NM_015718]                     | NM_015718       | 2          | 100         | 2.90E-23 |
| 886683      | A_32_P54274    | DRD5             | Homo sapiens dopamine receptor D5 (DRD5), mRNA [NM_000798]                | NM_000798       | 2          | 100         | 2.68E-23 |
| 1155509     | A_24_P492083   |                  | AF150244 Human mRNA from cd34+ stem cells Homo sapiens cD                 | AF150244        | 1.95368    | 89.88314    | 1.46E-22 |
| 879364      | A_23_P155057   | CYTH4            | Homo sapiens cytohesin 4 (CYTH4), mRNA [NM_013385]                        | NM_013385       | 1.9024     | 79.87289    | 2.20E-22 |
| 2333454     | A_19_P00329766 |                  | lincRNA:chrX:115401722-115413847 forward strand                           |                 | 1.85721    | 71.98043    | 1.07E-22 |
| 2332892     | A_33_P3276386  |                  | Unknown                                                                   |                 | 1.84041    | 69.24859    | 1.17E-22 |
| 2325685     | A_33_P3214670  | HK2              | Homo sapiens hexokinase 2 (HK2), mRNA [NM_000189]                         | NM_000189       | 1.82895    | 67.44449    | 2.71E-22 |
| 885170      | A_23_P355394   | STK32A           | Homo sapiens serine/threonine kinase 32A (STK32A), transcript v           | NM_145001       | 1.80305    | 63.5404     | 6.87E-22 |
| 1198985     | A_23_P304304   | ARSF             | Homo sapiens arylsulfatase F (ARSF), mRNA [NM_004042]                     | NM_004042       | 1.73614    | 54.46828    | 1.34E-22 |
| 2313161     | A_33_P3331150  |                  | Human IG rearranged H-chain mRNA V-region, partial cds. [L0385            | L03830          | 1.72954    | 53.64606    | 2.08E-21 |
| 1137544     | A_23_P425681   | CCK              | Homo sapiens cholecystokinin (CCK), transcript variant 1, mRNA            | NM_000729       | 1.72347    | 52.90116    | 1.72E-22 |
| 2332858     | A_33_P3281695  | LOC847310        | Homo sapiens testis expressed gene 22 (LOC847310), mRNA [NM               | NM_001195082    | 1.6761     | 47.4346     | 1.81E-22 |
| 2313619     | A_19_P00805987 |                  | lincRNA:chr18:53398227-53474402 reverse strand                            |                 | 1.64171    | 43.82396    | 3.54E-22 |
| 2317053     | A_33_P3236122  |                  | Unknown                                                                   |                 | 1.63463    | 43.11478    | 1.50E-20 |
| 2313034     | A_33_P3303982  | UBTF1            | Homo sapiens upstream binding transcription factor, RNA polymer           | NM_001143975    | 1.63372    | 43.02512    | 1.49E-20 |
| 2316927     | A_33_P3221578  |                  | PREDICTED: Homo sapiens FLJ45872 protein (FLJ45872), miscR                | XR_114214       | 1.60106    | 39.90776    | 3.48E-20 |
| 2328342     | A_19_P00807753 |                  | lincRNA:chr5:67086094-67113044 reverse strand                             |                 | 1.59765    | 39.55081    | 2.06E-20 |
| 2325165     | A_33_P3358943  | GRM2             | Homo sapiens glutamate receptor, metabotropic 2 (GRM2), transc            | NM_000839       | 1.58812    | 38.73644    | 6.52E-22 |
| 2332835     | A_19_P00324742 |                  | lincRNA:chr5:54162493-54208143 forward strand                             |                 | 1.58462    | 38.4257     | 7.66E-22 |
| 1147323     | A_23_P316472   | DNHD1            | Homo sapiens dynein heavy chain domain 1 (DNHD1), transcript              | v. NM_144666    | 1.57709    | 37.7648     | 2.72E-22 |
| 1140900     | A_23_P259049   | SLC45A2          | Homo sapiens solute carrier family 45, member 2 (SLC45A2), tran           | NM_016180       | 1.57612    | 37.68072    | 5.67E-22 |
| 2317054     | A_19_P00813078 |                  | lincRNA:chr4:74537611-74598511 forward strand                             |                 | 1.57167    | 37.29701    | 4.47E-22 |
| 2332860     | A_19_P00804713 |                  | lincRNA:chrX:39980256-39991281 forward strand                             |                 | 1.54869    | 35.37449    | 1.41E-19 |
| 2312901     | A_19_P00323817 |                  | lincRNA:chr11:129133890-129145940 forward strand                          |                 | 1.54452    | 35.03653    | 1.74E-19 |
| 2330100     | A_33_P3507270  | EFCAB5           | Homo sapiens EF-hand calcium binding domain 5 (EFCAB5), trans             | NM_198529       | 1.53012    | 33.89347    | 2.99E-19 |
| 1160252     | A_24_P169507   | MUC17            | Homo sapiens mucin 17, cell surface associated (MUC17), mRNA              | NM_001040105    | 1.52064    | 33.16204    | 3.64E-19 |
| 2332602     | A_33_P3404257  | VN1R103P         | Homo sapiens cDNA FLJ43558 fis, clone PROST2018607. [AK125                | AK125546        | 1.51067    | 32.40945    | 4.80E-21 |
| 2332859     | A_33_P3294277  | CYP4F3           | Homo sapiens cytochrome P450, family 4, subfamily F, polypepti            | de NM_000896    | 1.506      | 32.06258    | 4.33E-21 |
| 1139288     | A_32_P202182   | SPDYE8P          | Homo sapiens speedy homolog EB (Xenopus laevis), pseudogene               | (: NR_003664    | 1.49854    | 31.51696    | 1.82E-21 |
| 1161067     | A_23_P148641   | TTTTY12          | Homo sapiens testis-specific transcript, Y-linked 12 (non-protein         | NR_001551       | 1.49183    | 31.03371    | 5.37E-20 |
| 2328230     | A_33_P3348395  |                  | Uncharacterized protein ENSP00000372125 [Source:UniProtKB/Swiss-Prot;Acc: |                 | 1.44082    | 27.58173    | 5.63E-21 |
| 869222      | A_24_P390495   | CX3CL1           | Homo sapiens chemokine (C-X <sub>3</sub> -C motif) ligand 1 (CX3CL1), mRN | NM_002996       | 1.39741    | 24.96954    | 4.13E-22 |
| 2313089     | A_33_P3311543  |                  | Unknown                                                                   |                 | 1.39519    | 24.84209    | 1.55E-20 |
| 2316774     | A_19_P00807075 |                  | lincRNA:chr1:224624052-224647602 reverse strand                           |                 | 1.3921     | 24.66581    | 5.83E-17 |
| 2313136     | A_19_P00321802 |                  | lincRNA:chr6:64472442-64498999 reverse strand                             |                 | 1.31658    | 20.72898    | 2.25E-15 |
| 2332480     | A_33_P3265254  |                  | Unknown                                                                   |                 | 1.30304    | 20.09263    | 1.05E-15 |
| 882334      | A_24_P203000   | IL2RB            | Homo sapiens interleukin 2 receptor, beta (IL2RB), mRNA [NM_001           | NM_000878       | 1.2979     | 19.85643    | 3.00E-20 |
| 1140976     | A_24_P300557   | TBX5             | Homo sapiens T-box 5 (TBX5), transcript variant 1, mRNA [NM_001           | NM_000192       | 1.2879     | 19.4043     | 5.91E-18 |
| 2336005     | A_33_P3227736  | C6orf227         | Homo sapiens chromosome 6 open reading frame 227 (C6orf227),              | NR_027908       | 1.28489    | 19.27038    | 2.05E-13 |
| 881201      | A_24_P128713   |                  | ankyrin repeat domain 44 [Source:HGNC Symbol;Acc:25259] [ENS              | AK097086        | 1.27919    | 19.01906    | 7.29E-20 |
| 2327680     | A_19_P00321448 |                  | lincRNA:chr7:19970681-20008020 forward strand                             |                 | 1.25681    | 18.06401    | 8.06E-14 |
| 1160858     | A_23_P307570   | ABCC13           | Homo sapiens ATP-binding cassette, sub-family C (CFTR/MRP),               | NR_003087       | 1.2538     | 17.93913    | 9.39E-14 |
| 1162291     | A_23_P215331   | CRHR2            | Homo sapiens corticotropin releasing hormone receptor 2 (CRHR2)           | NM_001883       | 1.24344    | 17.51615    | 9.67E-22 |
| 2333525     | A_19_P00319066 |                  | lincRNA:chr8:122966846-123139423 reverse strand                           |                 | 1.23982    | 17.37085    | 1.17E-20 |
| 879191      | A_23_P347610   | HAVCR1           | Homo sapiens hepatitis A virus cellular receptor 1 (HAVCR1), tra          | n NM_012206     | 1.19902    | 15.81309    | 1.62E-19 |
| 1141555     | A_23_P385199   | EPHA10           | Homo sapiens EPH receptor A10 (EPHA10), transcript variant 2,             | n NM_173641     | 1.19387    | 15.6269     | 1.17E-20 |
| 2312885     | A_33_P3247589  |                  | Unknown                                                                   |                 | 1.19194    | 15.55767    | 2.38E-12 |
| 2334800     | A_33_P3723448  | ART3             | Homo sapiens ADP-ribosyltransferase 3 (ART3), transcript varian           | NM_001130017    | 1.18942    | 15.46744    | 5.51E-16 |
| 880981      | A_24_P25544    | GDNF             | Homo sapiens glial cell derived neurotrophic factor (GDNF), transc        | NM_000514       | 1.18334    | 15.25245    | 9.11E-16 |
| 882326      | A_23_P29608    | IQCF5            | Homo sapiens IQ motif containing F5 (IQCF5), mRNA [NM_001145              | NM_001145059    | 1.15665    | 14.34336    | 6.08E-16 |
| 1166646     | A_23_P38696    | DSC1             | Homo sapiens desmocollin 1 (DSC1), transcript variant Dsc1b, mR           | NM_004948       | 1.10407    | 12.7078     | 7.13E-14 |
| 881712      | A_24_P267592   | SAMHD1           | Homo sapiens SAM domain and HD domain 1 (SAMHD1), mRNA [J                 | NM_015474       | 1.08396    | 12.1327     | 9.89E-20 |
| 2323131     | A_33_P3213617  |                  | V <sub>5</sub> segment translation product Fragment [Source:UniProtKB/TrE | A25493          | 1.06154    | 11.52233    | 5.76E-09 |
| 2327866     | A_33_P3218316  | VSTM2B           | Homo sapiens V-set and transmembrane domain containing 2B (V              | NM_001146339    | 1.05737    | 11.41215    | 7.72E-09 |
| 2325567     | A_19_P00322088 |                  | lincRNA:chr16:11477618-11478868 reverse strand                            |                 | 1.02826    | 10.6724     | 2.13E-13 |
| 2312599     | A_19_P00800410 |                  | lincRNA:chr18:68000270-68008995 reverse strand                            |                 | 0.99296    | 9.83931     | 1.85E-07 |
| 2312663     | A_33_P3250899  |                  | Unknown                                                                   |                 | 0.96346    | 9.193       | 6.84E-07 |
| 2333164     | A_33_P3209135  |                  | Unknown                                                                   |                 | 0.96037    | 9.12785     | 6.40E-07 |
| 2333382     | A_33_P3875570  | LOC100270679     | UI-1-BC1p-akz-b-02-U.Ls1 NCLCGAP_P13 Homo sapiens cDN                     | BQ013595        | 0.9556     | 9.02821     | 1.27E-06 |
| 1144094     | A_23_P31798    | NAT2             | Homo sapiens N-acetyltransferase 2 (arylamine N-acetyltransfera           | NM_000015       | 0.93999    | 8.70938     | 1.95E-20 |
| 2312753     | A_33_P3264657  | CYP27C1          | Homo sapiens cytochrome P450, family 27, subfamily C, polypepti           | de NM_001001665 | 0.9384     | 8.67758     | 1.71E-14 |
| 1163074     | A_32_P84373    | FAM153C          | Homo sapiens family with sequence similarity 153, member C (FAM           | NM_001079527    | 0.9322     | 8.55454     | 3.17E-06 |
| 886971      | A_23_P97402    | CAMK1G           | Homo sapiens calcium/calmodulin-dependent protein kinase IG (C            | NM_020439       | 0.92428    | 8.40006     | 6.17E-06 |
| 2333100     | A_33_P3227482  | FLJ43944         | Homo sapiens cDNA FLJ43944 fis, clone TEST14014392. [AK1259               | AK125932        | 0.90883    | 8.06916     | 2.86E-08 |
| 2328094     | A_33_P3383189  | SP9              | Homo sapiens Sp9 transcription factor homolog (mouse) (SP9), ml           | NM_001145250    | 0.8905     | 7.77147     | 7.10E-18 |
| 1142161     | A_32_P23308    | LOC257358        | Homo sapiens hypothetical LOC257358 (LOC257358), non-coding               | NR_026945       | 0.88489    | 7.6717      | 1.22E-06 |
| 887149      | A_23_P381172   | MRAP             | Homo sapiens melanocortin 2 receptor accessory protein (MRAP)             | NM_206898       | 0.88455    | 7.66574     | 2.23E-08 |
| 2325770     | A_33_P3327642  | AIM1L            | Homo sapiens absent in melanoma 1-like (AIM1L), mRNA [NM_001              | NM_001039775    | 0.88313    | 7.64073     | 0.00003  |

Supplementary Table 1. Continued.

|         |                            |                                                                                |         |         |          |
|---------|----------------------------|--------------------------------------------------------------------------------|---------|---------|----------|
| 2313354 | A_19_P00328920             | lincRNA:chr12:65991133-66071408 reverse strand                                 | 0.87642 | 7.52342 | 2.18E-08 |
| 2330096 | A_33_P3305710              | Unknown                                                                        | 0.87052 | 7.42204 | 0.00221  |
| 2326138 | A_33_P3361067 ABCG2        | Homo sapiens ATP-binding cassette, sub-family G (WHITE), mem1 NM_004827        | 0.86983 | 7.41024 | 5.75E-19 |
| 2336019 | A_33_P3465703 SNORA60      | 601888042F1 NIH_MGC_17 Homo sapiens cDNA clone IMAGE:412 BF304636              | 0.86634 | 7.35093 | 2.36E-16 |
| 2333099 | A_33_P3872115 LOC727710    | Homo sapiens cDNA FLJ25723 fis, clone TST05459. [AK098589] AK098589            | 0.84797 | 7.04652 | 0.00002  |
| 1144506 | A_23_P42897 MGAM           | Homo sapiens maltase-glucoamylase (alpha-glucosidase) (MGAM) NM_004668         | 0.83719 | 6.87368 | 0.00015  |
| 886684  | A_23_P360924 CLDN17        | Homo sapiens claudin 17 (CLDN17), mRNA [NM_012131] NM_012131                   | 0.83639 | 6.86101 | 0.00015  |
| 2333453 | A_19_P00805888             | lincRNA:chr6:28134146-28139947 forward strand                                  | 0.82915 | 6.74768 | 0.00019  |
| 2312797 | A_19_P00804825             | lincRNA:chr3:112308735-112319860 reverse strand                                | 0.82638 | 6.70467 | 2.20E-13 |
| 1164351 | A_24_P379353 CCDC24        | Homo sapiens coiled-coil domain containing 24 (CCDC24), mRNA NM_152499         | 0.81689 | 6.55973 | 8.25E-15 |
| 2312654 | A_33_P3211988 LOC100133207 | PREDICTED: Homo sapiens hypothetical LOC100133207 (LOC100 XR_110242            | 0.81465 | 6.52607 | 0.00027  |
| 2323250 | A_33_P3223022              | CR745051 NCLCGAP_Co16 Homo sapiens cDNA clone IMAGp971 CR745051                | 0.81331 | 6.50594 | 0.00035  |
| 2327782 | A_19_P00329113             | lincRNA:chr7:80367-94117 forward strand                                        | 0.81164 | 6.48101 | 1.00E-16 |
| 2313028 | A_33_P3354688              | full-length cDNA clone CS0DB006YB20 of Neuroblastoma Cot 10 CR625008           | 0.80785 | 6.42462 | 1.76E-16 |
| 2329974 | A_33_P3346691              | Unknown                                                                        | 0.80697 | 6.41165 | 0.00042  |
| 2332403 | A_19_P00804120             | lincRNA:chr13:41416375-41460125 forward strand                                 | 0.80402 | 6.36827 | 5.51E-13 |
| 2326173 | A_33_P3382063 LOC440925    | Homo sapiens hypothetical LOC440925 (LOC440925), non-coding NR_027433          | 0.78888 | 6.14888 | 0.00075  |
| 1137521 | A_24_P550924 BTBD19        | Homo sapiens BTB (POZ) domain containing 19 (BTBD19), mRNA NM_001136537        | 0.78811 | 6.13916 | 0.00065  |
| 880437  | A_23_P47728 MAP6           | Homo sapiens microtubule-associated protein 6 (MAP6), transcrip NM_033063      | 0.78702 | 6.12378 | 4.34E-16 |
| 2327513 | A_19_P00316061             | lincRNA:chr1:234845129-234857092 forward strand                                | 0.78532 | 6.09979 | 0.00077  |
| 2325759 | A_33_P3310588              | Unknown                                                                        | 0.77775 | 5.99106 | 0.00051  |
| 2313741 | A_19_P00327103             | lincRNA:chr3:37886971-37901969 forward strand                                  | 0.77346 | 5.93557 | 1.06E-14 |
| 2313088 | A_33_P3341007              | cDNA FLJ40133 fis, clone TESTI2012231 [Source:UniProtKB/Trl XR_114873          | 0.77115 | 5.90888 | 1.34E-06 |
| 2313318 | A_33_P3234482 LOC100132919 | PREDICTED: Homo sapiens hypothetical protein LOC100132919 ( XM_001715268       | 0.76666 | 5.84245 | 0.00107  |
| 2332688 | A_19_P00321586             | lincRNA:chrX:97828872-98120013 forward strand                                  | 0.75881 | 5.73866 | 0.00144  |
| 2312990 | A_33_P3246774 LOC649201    | PREDICTED: Homo sapiens paraneoplastic antigen like 6A-like (Ll XM_001127211   | 0.75574 | 5.69817 | 0.0006   |
| 2318995 | A_33_P3210418 SLC5A10      | Homo sapiens solute carrier family 5 (sodium/glucose cotransport NM_152351     | 0.75466 | 5.68412 | 0.00174  |
| 889093  | A_23_P167585 GDF9          | Homo sapiens growth differentiation factor 9 (GDF9), mRNA [NM_005260           | 0.74921 | 5.61314 | 8.83E-07 |
| 2333946 | A_33_P3251801 KLRG2        | Homo sapiens killer cell lectin-like receptor subfamily G, member NM_198508    | 0.74753 | 5.59149 | 0.00999  |
| 2312798 | A_33_P3334000              | Unknown                                                                        | 0.74628 | 5.57541 | 0.00031  |
| 880995  | A_24_P216014 GH2           | Homo sapiens growth hormone 2 (GH2), transcript variant 3, mRN NM_022558       | 0.74281 | 5.53103 | 0.00004  |
| 2331548 | A_19_P00810108             | lincRNA:chrX:38716431-38792681 reverse strand.                                 | 0.74192 | 5.51988 | 0.00053  |
| 2312771 | A_33_P3416757 PRLR         | Homo sapiens prolactin receptor (PRLR), mRNA [NM_000949] NM_000949             | 0.73966 | 5.49111 | 0.00256  |
| 2325597 | A_33_P3314352              | Unknown                                                                        | 0.73913 | 5.48445 | 0.00268  |
| 2320385 | A_33_P3327381              | BX097352 Soares_testis_NHT Homo sapiens cDNA clone IMAGp9t BX097352            | 0.73722 | 5.46029 | 0.00279  |
| 2312879 | A_19_P00318216             | lincRNA:chr8:129022630-129113453 reverse strand                                | 0.7359  | 5.44376 | 0.00262  |
| 2316883 | A_33_P3209772 POU4F1       | Homo sapiens POU class 4 homeobox 1 (POU4F1), mRNA [NM_00_006237               | 0.73584 | 5.44301 | 0.00288  |
| 2314589 | A_19_P00321664             | lincRNA:chr4:6672454-6675524 forward strand                                    | 0.73433 | 5.42413 | 0.00003  |
| 1159480 | A_24_P56330 C13orf16       | Homo sapiens chromosome 13 open reading frame 16 (C13orf16), NM_152324         | 0.72447 | 5.30233 | 0.0002   |
| 885381  | A_23_P76322 PIK3C2G        | Homo sapiens phosphoinositide-3-kinase, class 2, gamma polypep NM_004570       | 0.72252 | 5.27856 | 0.00009  |
| 2313950 | A_33_P3279276 GRIP2        | Homo sapiens glutamate receptor interacting protein 2 (GRIP2), r NM_001080423  | 0.72178 | 5.26958 | 0.00374  |
| 2330070 | A_33_P3409458              | Uncharacterized protein C9orf171 [Source:UniProtKB/Swiss-Prot;Acc:Q6ZQR2] [    | 0.71807 | 5.22485 | 5.95E-09 |
| 886914  | A_23_P207879 CARD14        | Homo sapiens caspase recruitment domain family, member 14 (CA NM_024110        | 0.71643 | 5.20513 | 0.00475  |
| 2319089 | A_19_P00800085             | lincRNA:chrX:73422428-73423502 forward strand                                  | 0.71572 | 5.19664 | 0.00422  |
| 2312560 | A_33_P3228985 LOC100132396 | Homo sapiens zinc finger protein 705D-like (LOC100132396), mRN NM_001193630    | 0.71147 | 5.14596 | 0.00463  |
| 2325771 | A_33_P3570193 FLJ36000     | Homo sapiens hypothetical FLJ36000 (FLJ36000), non-coding RN NR_027084         | 0.71031 | 5.13225 | 0.0043   |
| 2327311 | A_33_P3241184              | Unknown                                                                        | 0.70549 | 5.07566 | 6.65E-15 |
| 2334089 | A_33_P3231247 LOC727836    | Putative uncharacterized protein ENSP00000391318 [Source:UniProtKB/TrEMBL      | 0.70461 | 5.06534 | 0.00574  |
| 1151276 | A_24_P870820 PTN           | Homo sapiens pleiotrophin (PTN), mRNA [NM_002825] NM_002825                    | 0.70375 | 5.05535 | 0.00015  |
| 2315360 | A_33_P3620832 ZNF483       | Homo sapiens zinc finger protein 483 (ZNF483), transcript variant NM_001007169 | 0.70133 | 5.0272  | 0.00022  |
| 2323266 | A_33_P3219537 NCRNA00207   | Homo sapiens non-protein coding RNA 207 (NCRNA00207), transi NR_028409         | 0.69725 | 4.98025 | 0.00684  |
| 2323392 | A_33_P3560176              | BX096849 Soares_NFL_T_GBC_S1 Homo sapiens cDNA clone IMA BX096849              | 0.69635 | 4.96994 | 0.00742  |
| 1162739 | A_24_P84657 MUC2           | Homo sapiens mucin 2, oligomeric mucins/gel-forming (MUC2), mF NM_002457       | 0.69408 | 4.94399 | 0.00779  |
| 2333317 | A_19_P00320499             | lincRNA:chr6:132224787-132228642 forward strand                                | 0.69133 | 4.91275 | 1.95E-11 |
| 2312796 | A_19_P00320255             | lincRNA:chr15:21165302-21166134 forward strand                                 | 0.68718 | 4.86608 | 0.00006  |
| 2314399 | A_33_P3275702 FMO2         | Homo sapiens flavin containing monooxygenase 2 (non-functional) NM_001460      | 0.6861  | 4.85395 | 0.00032  |
| 1143034 | A_23_P16694 CPS1-IT        | Homo sapiens CPS1 intronic transcript (non-protein coding) (CPS NR_002763      | 0.67543 | 4.73625 | 4.01E-07 |
| 2313011 | A_19_P00804574             | lincRNA:chr19:56789963-56824563 forward strand                                 | 0.67321 | 4.71206 | 0.00256  |
| 2316929 | A_33_P3354553 LOC390638    | PREDICTED: Homo sapiens Golgin subfamily A member 2-like (LC XM_001715670      | 0.66397 | 4.61281 | 0.00156  |
| 1138131 | A_32_P88415 MYOZ3          | Homo sapiens myozenin 3 (MYOZ3), transcript variant 2, mRNA [NM_133371         | 0.65744 | 4.544   | 3.89E-14 |
| 2332836 | A_33_P3369016              | PREDICTED: Homo sapiens hypothetical LOC645685 (LOC645685 XM_928694            | 0.64815 | 4.44784 | 1.38E-06 |
| 2334995 | A_19_P00806323             | lincRNA:chr1:147706526-147727651 reverse strand                                | 0.64539 | 4.41967 | 0.0031   |
| 2330315 | A_19_P00321078             | lincRNA:chr19:52588083-52597524 forward strand                                 | 0.64358 | 4.40131 | 6.63E-14 |
| 1157254 | A_32_P158226 LOC158572     | Homo sapiens hypothetical LOC158572 (LOC158572), non-coding NR_026742          | 0.64341 | 4.39954 | 0.0052   |
| 2322691 | A_33_P3372212 PSG10P       | Human processed pseudo-pregnancy-specific glycoprotein (PSG1 L14723            | 0.6425  | 4.39038 | 0.00847  |
| 2330071 | A_33_P3375269              | Unknown                                                                        | 0.64208 | 4.38617 | 0.00704  |
| 1138097 | A_24_P928969 PTPN3         | Homo sapiens protein tyrosine phosphatase, non-receptor type 3 NM_001145369    | 0.63754 | 4.34054 | 0.0016   |
| 2330192 | A_19_P00328485             | lincRNA:chr5:124817426-124830024 reverse strand                                | 0.6214  | 4.18219 | 3.29E-09 |
| 2327713 | A_33_P3305058              | Homo sapiens cDNA FLJ43238 fis, clone HCHON2007881. [AK12 AK125228             | 0.61905 | 4.1596  | 3.58E-06 |
| 2328986 | A_19_P00331229             | lincRNA:chr8:17355272-17386123 forward strand                                  | 0.61285 | 4.10059 | 5.41E-10 |
| 1159420 | A_23_P418485 C11orf65      | Homo sapiens chromosome 11 open reading frame 65 (C11orf65), NM_152587         | 0.61224 | 4.09491 | 0.00287  |
| 2329853 | A_19_P00803281             | lincRNA:chr12:3723064-3743064 forward strand                                   | 0.60759 | 4.05124 | 0.00015  |

Supplementary Table 1. Continued.

|         |                |                                                                  |                                                                         |                   |         |          |          |
|---------|----------------|------------------------------------------------------------------|-------------------------------------------------------------------------|-------------------|---------|----------|----------|
| 2326590 | A_33_P3398187  | Unknown                                                          | 0.60387                                                                 | 4.01672           | 0.0047  |          |          |
| 2327555 | A_33_P3215834  | SORCS2                                                           | Homo sapiens sortilin-related VPS10 domain containing receptor          | NM_020777         | 0.60247 | 4.00378  | 0.00895  |
| 2318439 | A_33_P3403595  | Putative uncharacterized protein FLJ46792                        | [Source:UniProtKB/TrEMBL:AK128633]                                      | 0.60062           | 3.98676 | 0.00405  |          |
| 2319616 | A_33_P3353996  | PPP1R3G                                                          | Homo sapiens protein phosphatase 1, regulatory (inhibitor) subunit      | NM_001145115      | 0.59606 | 3.94509  | 3.49E-06 |
| 1145452 | A_23_P23646    | USF1                                                             | Homo sapiens upstream transcription factor 1 (USF1), transcript         | NM_007122         | 0.59575 | 3.94228  | 2.38E-15 |
| 1143061 | A_23_P91317    | RAD21L1                                                          | Homo sapiens RAD21-like 1 (S. pombe) (RAD21L1), mRNA                    | [NM_001136566]    | 0.59544 | 3.93949  | 0.0001   |
| 888760  | A_23_P134139   | FABP7                                                            | Homo sapiens fatty acid binding protein 7, brain (FABP7), mRNA          | [NM_001446]       | 0.58451 | 3.84158  | 5.31E-08 |
| 882700  | A_24_P181254   | OLFM4                                                            | Homo sapiens olfactomedin 4 (OLFM4), mRNA                               | [NM_006418]       | 0.58423 | 3.83914  | 0.00633  |
| 2313090 | A_19_P00320841 | lincRNA:chr16:72557245-72661585 reverse strand                   |                                                                         | 0.58334           | 3.83123 | 1.60E-12 |          |
| 2331529 | A_19_P00318297 | lincRNA:chr7:77287012-77290598 reverse strand                    |                                                                         | 0.58223           | 3.82146 | 0.00716  |          |
| 1155912 | A_23_P114210   | POU3F4                                                           | Homo sapiens POU class 3 homeobox 4 (POU3F4), mRNA                      | [NM_000307]       | 0.58178 | 3.81748  | 0.00546  |
| 1142763 | A_23_P2317     | DDN                                                              | Homo sapiens dendrin (DDN), mRNA                                        | [NM_015086]       | 0.58153 | 3.81533  | 6.79E-06 |
| 2322379 | A_33_P3331335  | TET3                                                             | Homo sapiens tet oncogene family member 3 (TET3), mRNA                  | [NM_144993]       | 0.57871 | 3.7906   | 0.00673  |
| 1160842 | A_23_P163697   | SYT17                                                            | Homo sapiens synaptotagmin XVII (SYT17), mRNA                           | [NM_016524]       | 0.57551 | 3.76279  | 4.36E-09 |
| 2316861 | A_33_P3224190  | SLC29A4                                                          | Homo sapiens solute carrier family 29 (nucleoside transporters), member | 29 [NM_001040661] | 0.57061 | 3.72054  | 0.00343  |
| 2316804 | A_19_P00809247 | lincRNA:chr13:91173499-91254624 reverse strand                   |                                                                         | 0.55888           | 3.62139 | 0.00045  |          |
| 2314494 | A_33_P3254579  | LOC285095                                                        | PREDICTED: Homo sapiens hypothetical protein LOC285095, transcript      | XM_001722643      | 0.55883 | 3.62104  | 0.00598  |
| 2325438 | A_33_P3296634  | OR1L6                                                            | olfactory receptor, family 1, subfamily L, member 6 [Source:HGNC        | AB529307]         | 0.55478 | 3.58739  | 0.00003  |
| 1161185 | A_23_P203267   | TRIM29                                                           | Homo sapiens tripartite motif-containing 29 (TRIM29), mRNA              | [NM_012101]       | 0.5537  | 3.57851  | 0.00097  |
| 2313814 | A_19_P00321176 | lincRNA:chrX:110799569-110812724 reverse strand                  |                                                                         | 0.55023           | 3.55004 | 0.0003   |          |
| 2319663 | A_33_P3254579  | KRTAP1-5                                                         | Homo sapiens keratin associated protein 1-5 (KRTAP1-5), mRNA            | NM_031957         | 0.54988 | 3.54713  | 0.00146  |
| 2324441 | A_19_P00324820 | lincRNA:chr2:47735821-47746846 forward strand                    |                                                                         | 0.54711           | 3.5246  | 0.00017  |          |
| 2315999 | A_19_P00331971 | lincRNA:chrX:133675909-133682959 reverse strand                  |                                                                         | 0.54292           | 3.49072 | 0.00469  |          |
| 2317444 | A_33_P3354574  | Unknown                                                          |                                                                         | 0.54224           | 3.48528 | 0.00452  |          |
| 2325421 | A_33_P3221665  | KIF21B                                                           | Homo sapiens kinesin family member 21B (KIF21B), mRNA                   | [NM_01517596]     | 0.53208 | 3.40472  | 0.00684  |
| 2326242 | A_19_P00316995 | lincRNA:chr17:75084810-75085353 reverse strand                   |                                                                         | 0.52557           | 3.35402 | 0.00961  |          |
| 884722  | A_23_P427645   | TLL1                                                             | Homo sapiens tolloid-like 1 (TLL1), mRNA                                | [NM_012464]       | 0.52538 | 3.35262  | 0.00538  |
| 1161527 | A_32_P191840   | LOC644662                                                        | PREDICTED: Homo sapiens hypothetical protein LOC644662, transcript      | XM_933903         | 0.52132 | 3.32141  | 0.00005  |
| 2333735 | A_19_P00810231 | lincRNA:chr12:47044233-47098483 forward strand                   |                                                                         | 0.51507           | 3.27393 | 0.00011  |          |
| 2316759 | A_33_P3264790  | GJD4                                                             | Homo sapiens gap junction protein, delta 4, 40.1kDa, mRNA (cDNA         | BC035898]         | 0.51161 | 3.24796  | 0.00492  |
| 2327761 | A_33_P3250555  | Uncharacterized protein C18orf2                                  | [Source:UniProtKB/Swiss-Prot:AF295728]                                  | 0.511             | 3.24342 | 0.00006  |          |
| 1138046 | A_24_P125561   | SIGLEC9                                                          | Homo sapiens sialic acid binding Ig-like lectin 9 (SIGLEC9), trans      | NM_014441]        | 0.50805 | 3.22143  | 0.00828  |
| 2331899 | A_19_P00329800 | lincRNA:chr1:204525202-204541352 forward strand                  |                                                                         | 0.50568           | 3.20392 | 5.28E-11 |          |
| 883932  | A_23_P128503   | IL26                                                             | Homo sapiens interleukin 26 (IL26), mRNA                                | [NM_018402]       | 0.50431 | 3.19385  | 0.00266  |
| 2329975 | A_33_P3277608  | Unknown                                                          |                                                                         | 0.49735           | 3.14301 | 5.96E-07 |          |
| 2328457 | A_33_P3404489  | MAMLD1                                                           | Homo sapiens mastermind-like domain containing 1 (MAMLD1), transcript   | NM_001177465]     | 0.49719 | 3.1419   | 0.00356  |
| 2313311 | A_33_P3226557  | PRR23B                                                           | Homo sapiens proline rich 23B (PRR23B), mRNA                            | [NM_001013650]    | 0.49667 | 3.13815  | 0.00136  |
| 2316784 | A_33_P3346794  | UPF0627 protein ENSP0000341061/ENSP00000339743                   | [Source:XM_001130883]                                                   | 0.49426           | 3.12072 | 0.00236  |          |
| 1141675 | A_32_P78101    | IGSF21                                                           | Homo sapiens immunoglobulin superfamily, member 21 (IGSF21), mRNA       | NM_032880]        | 0.49198 | 3.10445  | 1.54E-06 |
| 2316263 | A_19_P00810328 | lincRNA:chr16:11468274-11482224 forward strand                   |                                                                         | 0.47578           | 2.99072 | 0.00928  |          |
| 2323865 | A_19_P00802508 | lincRNA:chr2:12453499-12466124 forward strand                    |                                                                         | 0.47354           | 2.9754  | 0.0006   |          |
| 2320947 | A_33_P3316728  | Putative GED domain-containing protein LOC54175                  | [Source:UniProtKB/Swiss-Prot:Q95300]                                    | 0.47309           | 2.97231 | 0.00667  |          |
| 2332940 | A_33_P3339990  | LOC100128429                                                     | Homo sapiens cDNA FLJ41329 fis, clone BRAMY2047676, [AK123              | AK123323]         | 0.47156 | 2.9618   | 4.49E-06 |
| 2315276 | A_33_P3265866  | Unknown                                                          |                                                                         | 0.46857           | 2.94149 | 9.21E-09 |          |
| 2325561 | A_19_P00803876 | lincRNA:chr2:235342486-235378011 forward strand                  |                                                                         | 0.46497           | 2.91721 | 5.74E-10 |          |
| 2319756 | A_33_P3329241  | DA734585 NT2RP2                                                  | Homo sapiens cDNA clone NT2RP2005523 5', DA734585                       | 0.46472           | 2.91553 | 0.00805  |          |
| 2319233 | A_33_P3249958  | LOC642852                                                        | Homo sapiens hypothetical LOC642852 (LOC642852), non-coding             | NR_028943]        | 0.46408 | 2.91128  | 0.00925  |
| 2312922 | A_33_P3232273  | Unknown                                                          |                                                                         | 0.46397           | 2.91051 | 0.00145  |          |
| 2312878 | A_19_P00810938 | lincRNA:chr6:3176201-3194126 forward strand                      |                                                                         | 0.46309           | 2.9046  | 0.00015  |          |
| 1155450 | A_23_P399797   | SMAD5OS                                                          | Homo sapiens SMAD family member 5 opposite strand (SMAD5OS)             | NR_026763]        | 0.46041 | 2.88678  | 0.0074   |
| 1180116 | A_23_P164068   | DNAH9                                                            | Homo sapiens dynein, axonemal, heavy chain 9 (DNAH9), transcript        | NM_001372]        | 0.45863 | 2.87493  | 0.00873  |
| 2335739 | A_33_P3380196  | AKAP9                                                            | Homo sapiens A kinase (PRKA) anchor protein (yotiao) 9, mRNA (          | BC015533]         | 0.45543 | 2.85384  | 0.00114  |
| 2321653 | A_33_P3417487  | signal peptide, CUB domain, EGF-like 1                           | [Source:HGNC Symbol;Acc:BC047916]                                       | 0.44854           | 2.80889 | 0.0003   |          |
| 1168308 | A_32_P925529   | PREDICTED: Homo sapiens similar to core 1 synthase, glycoprotein | XR_015594]                                                              | 0.44843           | 2.8082  | 0.00208  |          |
| 1140995 | A_23_P254353   | NOXA1                                                            | Homo sapiens NADPH oxidase activator 1 (NOXA1), mRNA                    | [NM_006647]       | 0.44784 | 2.80439  | 2.59E-09 |
| 2319700 | A_33_P3394175  | V <sub>5</sub> segment translation product Fragment              | [Source:UniProtKB/TrEMBL:AB308151]                                      | 0.44452           | 2.78741 | 0.00883  |          |
| 1139044 | A_24_P28722    | RSAD2                                                            | Homo sapiens radical S-adenosyl methionine domain containing 2          | NM_080657]        | 0.4421  | 2.76759  | 0.00605  |
| 2313824 | A_33_P3651282  | SNORA20                                                          | HHAGE017587 Human liver regeneration after partial hepatectomy          | DW416857]         | 0.43962 | 2.75185  | 3.95E-09 |
| 2322438 | A_33_P3307490  | Homo sapiens cDNA FLJ45043 fis, clone BRAWH3021012               | [AK126 AK126988]                                                        | 0.43883           | 2.7468  | 0.0049   |          |
| 880892  | A_23_P69497    | CLEC3B                                                           | Homo sapiens C-type lectin domain family 3, member B (CLEC3B)           | NM_003278]        | 0.43687 | 2.73446  | 0.00014  |
| 2328895 | A_19_P00801014 | lincRNA:chr4:80995226-81008001 reverse strand                    |                                                                         | 0.4357            | 2.72706 | 0.00154  |          |
| 2334031 | A_33_P3714482  | LRP5L                                                            | Homo sapiens low density lipoprotein receptor-related protein 5-1       | NM_001135772]     | 0.43316 | 2.71116  | 0.00026  |
| 2331720 | A_19_P00315637 | lincRNA:chr2:120986064-120986496 reverse strand                  |                                                                         | 0.43198           | 2.70382 | 0.0054   |          |
| 2326155 | A_33_P3255716  | LOC285095                                                        | PREDICTED: Homo sapiens hypothetical protein LOC285095, transcript      | XM_001722643]     | 0.42766 | 2.67705  | 5.25E-09 |
| 888487  | A_23_P3379     | RASGRF1                                                          | Homo sapiens Ras protein-specific guanine nucleotide-releasing f        | NM_002891]        | 0.42619 | 2.66805  | 0.0055   |
| 2331799 | A_19_P00330435 | lincRNA:chr7:79083614-79104439 forward strand                    |                                                                         | 0.42614           | 2.66772 | 0.00215  |          |
| 2323910 | A_19_P00805265 | lincRNA:chr6:29701971-29740296 forward strand                    |                                                                         | 0.42401           | 2.65468 | 0.00013  |          |
| 2312799 | A_33_P3370265  | LOC100508645                                                     | PREDICTED: Homo sapiens hypothetical protein LOC100508645 (             | XM_003120021]     | 0.42194 | 2.64206  | 0.00193  |
| 2312726 | A_33_P3298120  | HEPN1                                                            | Homo sapiens HEPACAM opposite strand 1 (HEPN1), mRNA                    | [NM_001037558]    | 0.42125 | 2.63786  | 0.00306  |
| 2327926 | A_19_P00802957 | lincRNA:chr10:1028350-1033600 forward strand                     |                                                                         | 0.42057           | 2.63369 | 0.00991  |          |
| 2335265 | A_33_P3360530  | Unknown                                                          |                                                                         | 0.41944           | 2.62885 | 0.00905  |          |
| 1140073 | A_23_P431505   | XKR6                                                             | Homo sapiens primary neuroblastoma cDNA, clone:Nbla00437, full          | AB073680]         | 0.41583 | 2.60513  | 9.47E-08 |

Supplementary Table 1. Continued.

|         |                            |                                                                                |         |         |          |
|---------|----------------------------|--------------------------------------------------------------------------------|---------|---------|----------|
| 2332523 | A_33_P3366391              | Putative uncharacterized protein ENSP00000339838 [Source:Unif AK128036         | 0.41414 | 2.59504 | 1.27E-08 |
| 2326983 | A_33_P3271470 GREB1L       | Homo sapiens growth regulation by estrogen in breast cancer-like NM_001142966  | 0.41383 | 2.59314 | 0.00151  |
| 2322332 | A_19_P00322412             | lincRNA:chr6:6794382-6801404 reverse strand                                    | 0.4137  | 2.5924  | 0.00161  |
| 2336174 | A_33_P3380652 ADAM28       | Homo sapiens ADAM metalloproteinase domain 28 (ADAM28), tran: NM_021777        | 0.41315 | 2.58914 | 0.00283  |
| 887463  | A_23_P14986 HSD11B2        | Homo sapiens hydroxysteroid (11-beta) dehydrogenase 2 (HSD11) NM_000196        | 0.40867 | 2.56255 | 0.00433  |
| 2330229 | A_19_P00810792             | lincRNA:chr11:39499974-40108074 forward strand                                 | 0.40573 | 2.54528 | 8.07E-07 |
| 2328536 | A_19_P00320716             | lincRNA:chr3:106830589-106959470 reverse strand                                | 0.40388 | 2.53445 | 0.0065   |
| 2319080 | A_33_P3541279              | Homo sapiens PRO0568 mRNA, complete cds. [AF116648] AF116649                   | 0.39892 | 2.50565 | 0.00595  |
| 2321635 | A_19_P00318451             | lincRNA:chr8:30724887-30746222 reverse strand                                  | 0.39398 | 2.47728 | 0.00709  |
| 2320762 | A_19_P00324706             | lincRNA:chr11:72446627-72462602 forward strand                                 | 0.39369 | 2.47567 | 0.00269  |
| 1154014 | A_24_P917819 ANKRD30BP2    | Homo sapiens ankyrin repeat domain 30B pseudogene 2 (ANKRD3) NR_026916         | 0.39279 | 2.47054 | 4.43E-08 |
| 2314385 | A_19_P00329774             | lincRNA:chr7:33679675-33695300 forward strand                                  | 0.39221 | 2.46723 | 3.57E-08 |
| 1150025 | A_23_P68998 MIOX           | Homo sapiens myo-inositol oxygenase (MIOX), mRNA [NM_017584 NM_017584          | 0.39103 | 2.46056 | 4.95E-12 |
| 2329461 | A_19_P00801430             | lincRNA:chr5:148229632-148269232 reverse strand                                | 0.39023 | 2.45603 | 0.00032  |
| 1150153 | A_32_P62090                | Coiled-coil domain-containing protein ENSP00000299415 [Source:UniProtKB/Swi    | 0.38983 | 2.45373 | 0.00586  |
| 1143083 | A_24_P357726 PSG8          | Homo sapiens pregnancy specific beta-1-glycoprotein 8 (PSG8), t NM_182707      | 0.38714 | 2.4386  | 0.00241  |
| 2328112 | A_33_P3291160              | Unknown                                                                        | 0.38691 | 2.4373  | 9.68E-06 |
| 2319702 | A_19_P00809537             | lincRNA:chr3:129814085-129688060 reverse strand                                | 0.38492 | 2.42616 | 0.00968  |
| 1160504 | A_24_P233078 PYY2          | Homo sapiens peptide YY, 2 (seminalplasmin) (PYY2), non-coding NR_003064       | 0.38252 | 2.41282 | 6.35E-08 |
| 2330389 | A_33_P3304764              | Unknown                                                                        | 0.38209 | 2.41038 | 0.00002  |
| 893692  | A_23_P62588 CALML6         | Homo sapiens calmodulin-like 6 (CALML6), mRNA [NM_138705] NM_138705            | 0.38126 | 2.40579 | 0.00226  |
| 2322641 | A_19_P00808575             | lincRNA:chr14:23018310-23025460 reverse strand                                 | 0.38122 | 2.4056  | 0.00197  |
| 2312824 | A_33_P3418571              | Unknown                                                                        | 0.38101 | 2.40442 | 0.00107  |
| 1144010 | A_23_P66328 ACSM2B         | Homo sapiens acyl-CoA synthetase medium-chain family member NM_182617          | 0.38073 | 2.40285 | 0.00184  |
| 2316143 | A_33_P3287907 LOC728723    | Homo sapiens hypothetical LOC728723 (LOC728723), non-coding NR_024398          | 0.37868 | 2.39153 | 0.00486  |
| 1155758 | A_23_P44867 AMBN           | Homo sapiens ameloblastin (enamel matrix protein) (AMBN), mRNA NM_016519       | 0.37774 | 2.38638 | 0.00281  |
| 2325472 | A_33_P3210368              | microRNA 762 [Source:HGNC Symbol;Acc:37303] [ENST00000380588 BC058863          | 0.37759 | 2.38558 | 0.00133  |
| 2325163 | A_33_P3332166 PRSS38       | Homo sapiens protease, serine, 38 (PRSS38), mRNA [NM_183062] NM_183062         | 0.376   | 2.37682 | 0.00008  |
| 2334665 | A_33_P3354514 SLC2A13      | Homo sapiens solute carrier family 2 (facilitated glucose transport) BC047507  | 0.37463 | 2.36936 | 0.00895  |
| 1145578 | A_32_P223173               | PREDICTED: Homo sapiens similar to acetyl-Coenzyme A acyltra: XR_037043        | 0.37456 | 2.36899 | 2.55E-07 |
| 2323429 | A_19_P00331284             | lincRNA:chr8:29414656-29675506 forward strand                                  | 0.3737  | 2.36427 | 0.00468  |
| 2317137 | A_33_P3276087              | Unknown                                                                        | 0.37347 | 2.36304 | 0.00201  |
| 2314843 | A_19_P00325961             | lincRNA:chr8:28912381-28922959 forward strand                                  | 0.37304 | 2.36068 | 1.11E-07 |
| 2322761 | A_19_P00805134             | lincRNA:chr12:105804881-105805536 reverse strand                               | 0.37222 | 2.35627 | 0.00171  |
| 2326327 | A_33_P3413353              | Unknown                                                                        | 0.36624 | 2.32401 | 0.00597  |
| 2318395 | A_33_P3382849 ACR          | Homo sapiens acrosin (ACR), mRNA [NM_001097] NM_001097                         | 0.36559 | 2.32055 | 0.00048  |
| 2329503 | A_33_P3278916              | PHD finger protein 20-like 1 [Source:HGNC Symbol;Acc:24280] [ENST0000036199    | 0.36323 | 2.30799 | 0.0017   |
| 2332723 | A_19_P00803767             | lincRNA:chr8:110172174-110224124 reverse strand                                | 0.35919 | 2.28662 | 0.00919  |
| 2315136 | A_33_P3381613              | Unknown                                                                        | 0.35668 | 2.27342 | 0.00442  |
| 1143491 | A_23_P117851 CPLX3         | Homo sapiens complexin 3 (CPLX3), mRNA [NM_001030005] NM_001030005             | 0.3551  | 2.26515 | 0.00138  |
| 2333251 | A_19_P00326780             | lincRNA:chr7:106355964-106363089 reverse strand                                | 0.35506 | 2.26494 | 0.00007  |
| 1136694 | A_32_P68942 C21orf81       | Homo sapiens chromosome 21 open reading frame 81 (C21orf81), NR_027270         | 0.35251 | 2.25169 | 0.00137  |
| 2313552 | A_33_P3321896              | DB053889 TEST12 Homo sapiens cDNA clone TEST12044585 5', n DB053889            | 0.35029 | 2.24021 | 0.00008  |
| 2322385 | A_19_P00800632             | lincRNA:chr2:152819954-152826029 reverse strand                                | 0.34947 | 2.236   | 5.15E-06 |
| 2314133 | A_33_P3233731              | PREDICTED: Homo sapiens hypothetical LOC100129238 (LOC100129238) XM_001716016  | 0.3487  | 2.23202 | 0.00228  |
| 2325505 | A_33_P3415617              | Unknown                                                                        | 0.34833 | 2.23011 | 7.18E-07 |
| 2326408 | A_33_P3310548 LOC100131131 | PREDICTED: Homo sapiens AHPA9419 (LOC100131131), miscRN, XR_109928             | 0.34823 | 2.22959 | 0.0025   |
| 2322354 | A_33_P3314531 LOC646853    | PREDICTED: Homo sapiens non-histone chromosomal protein HM XM_001719033        | 0.34744 | 2.22556 | 0.00004  |
| 2332029 | A_33_P3221177 ZDHHC20      | Homo sapiens zinc finger, DHHC-type containing 20 (ZDHHC20), t NM_153251       | 0.34698 | 2.2232  | 5.19E-06 |
| 2312945 | A_19_P00809185             | lincRNA:chr19:15400850-15442450 forward strand                                 | 0.34687 | 2.22264 | 0.00094  |
| 2315751 | A_33_P3388983 C5orf56      | Homo sapiens cDNA: FLJ21568 fis, clone COL06492. [AK025221] AK025221           | 0.34608 | 2.21858 | 0.00039  |
| 2318950 | A_19_P00331084             | lincRNA:chr2:203179905-203194480 forward strand                                | 0.34577 | 2.21701 | 0.00693  |
| 2313658 | A_33_P3231407              | pyrin and HIN domain family, member 1 [Source:HGNC Symbol;Acc: AK308350        | 0.34439 | 2.20999 | 0.00078  |
| 2320766 | A_33_P3805839              | Unknown                                                                        | 0.34402 | 2.20811 | 6.24E-06 |
| 2335186 | A_19_P00331406             | lincRNA:chr6:106935857-106946432 forward strand                                | 0.34279 | 2.20186 | 1.04E-06 |
| 881282  | A_23_P9883 NLRP3           | Homo sapiens NLR family, pyrin domain containing 3 (NLRP3), tran: NM_001079821 | 0.34214 | 2.19858 | 0.00184  |
| 2328606 | A_19_P00320570             | lincRNA:chr5:158848221-158984695 forward strand                                | 0.34113 | 2.19344 | 8.23E-07 |
| 879351  | A_23_P398566 NR4A3         | Homo sapiens nuclear receptor subfamily 4, group A, member 3 (NR4A3) NM_006981 | 0.3411  | 2.1933  | 7.47E-11 |
| 2313742 | A_33_P3347152              | suppressor of Ty 3 homolog (S. cerevisiae) [Source:HGNC Symbol;Acc:11466] [EN  | 0.34025 | 2.18902 | 0.00099  |
| 2325487 | A_19_P00800754             | lincRNA:chr17:87543555-87550405 reverse strand                                 | 0.33938 | 2.18462 | 4.23E-06 |
| 2323989 | A_19_P00320309             | lincRNA:chr21:43099535-43117496 reverse strand                                 | 0.33901 | 2.18277 | 1.29E-06 |
| 1152893 | A_32_P212095 C17orf105     | Homo sapiens chromosome 17 open reading frame 105 (C17orf105) NM_001136483     | 0.339   | 2.18271 | 0.0001   |
| 2320870 | A_19_P00323081             | lincRNA:chr3:156477781-156539131 forward strand                                | 0.33886 | 2.18205 | 0.00382  |
| 2318436 | A_33_P3278813 LOC100127885 | PREDICTED: Homo sapiens hypothetical protein LOC100127885 (XM_001721771        | 0.33814 | 2.17843 | 0.00054  |
| 1154483 | A_23_P47709 FOLR2          | Homo sapiens folate receptor 2 (fetal) (FOLR2), transcript variant NM_000803   | 0.33719 | 2.17365 | 0.00139  |
| 2317260 | A_19_P00802550             | lincRNA:chr12:105804881-105805536 forward strand                               | 0.33681 | 2.17176 | 0.00001  |
| 1139580 | A_32_P129950 NHLRC3        | Homo sapiens NHL repeat containing 3 (NHLRC3), transcript varia NM_001012754   | 0.33317 | 2.14633 | 1.50E-06 |
| 2320343 | A_33_P3219146 ODF3         | Homo sapiens outer dense fiber of sperm tails 3 (ODF3), mRNA [NM_053280        | 0.32999 | 2.13789 | 0.00052  |
| 2314360 | A_33_P3514487 VSTM1        | Homo sapiens V-set and transmembrane domain containing 1 (VS) NM_198481        | 0.32927 | 2.13438 | 0.00917  |
| 2318119 | A_33_P3882624 POT1         | Homo sapiens protection of telomeres 1 homolog (S. pombe) (POT1) NM_015450     | 0.32774 | 2.12688 | 1.48E-11 |
| 1152815 | A_24_P361643 C19orf55      | Homo sapiens chromosome 19 open reading frame 55 (C19orf55), NM_001039887      | 0.32565 | 2.11664 | 0.00037  |
| 2329764 | A_19_P00330855             | lincRNA:chr6:168670126-168683226 forward strand                                | 0.32317 | 2.10461 | 0.00387  |

Supplementary Table 1. Continued.

|         |                            |                                                                                 |          |          |          |
|---------|----------------------------|---------------------------------------------------------------------------------|----------|----------|----------|
| 2314125 | A_19_P00318029             | lincRNA:chr9:137444583-1374445743 forward strand                                | 0.32313  | 2.10442  | 0.00145  |
| 1162804 | A_23_P17663 MX1            | Homo sapiens myxovirus (influenza virus) resistance 1, interferon- NM_002462    | 0.32132  | 2.09568  | 2.20E-10 |
| 2332754 | A_19_P00802049             | lincRNA:chr14:28091410-28141510 reverse strand                                  | 0.31877  | 2.0834   | 0.00756  |
| 2332592 | A_33_P3252134              | Unknown                                                                         | 0.31868  | 2.08297  | 2.85E-08 |
| 2321752 | A_19_P00809022             | lincRNA:chr16:88737774-88742899 reverse strand                                  | 0.31804  | 2.07991  | 0.00679  |
| 2332655 | A_33_P3218960 CACNA1H      | Homo sapiens calcium channel, voltage-dependent, T type, alpha NM_021098        | 0.31718  | 2.07576  | 0.0038   |
| 2326689 | A_33_P3331326              | Unknown                                                                         | 0.31495  | 2.06512  | 3.46E-08 |
| 2316027 | A_33_P3309429              | Unknown BC039333                                                                | 0.31399  | 2.06058  | 3.73E-06 |
| 2333524 | A_33_P3248602 DUX4         | Homo sapiens double homeobox 4 (DUX4), mRNA [NM_033178] NM_033178               | 0.31287  | 2.05529  | 6.37E-08 |
| 2315323 | A_19_P00808893             | lincRNA:chr5:94005444-94012744 forward strand                                   | 0.31149  | 2.04877  | 0.00346  |
| 2317836 | A_19_P00326099             | lincRNA:chr14:96344047-96390722 forward strand                                  | 0.3101   | 2.04223  | 0.00003  |
| 888672  | A_23_P156897 ABHD16A       | Homo sapiens abhydrolase domain containing 16A (ABHD16A), tra NM_021160         | 0.30987  | 2.04114  | 7.47E-08 |
| 2329097 | A_33_P3254320 SH2D3A       | Homo sapiens SH2 domain containing 3A (SH2D3A), mRNA [NM_005490]                | 0.30961  | 2.03989  | 0.00493  |
| 1158900 | A_24_P232790 C14orf162     | Homo sapiens chromosome 14 open reading frame 162 (C14orf16; NR_024630)         | 0.30915  | 2.03775  | 4.84E-08 |
| 2318877 | A_19_P00323658             | lincRNA:chr1:204566252-204573127 forward strand                                 | 0.30886  | 2.0364   | 0.00537  |
| 2336146 | A_19_P00331743             | lincRNA:chr6:41411797-41426472 reverse strand                                   | 0.30777  | 2.03129  | 0.00013  |
| 882169  | A_24_P080538 GGNBP1        | Homo sapiens gametogenetin binding protein 1 (GGNBP1), non-co NR_028361         | 0.30746  | 2.02983  | 0.00015  |
| 2324990 | A_19_P00325872             | lincRNA:chr1:9781824-9791949 reverse strand                                     | 0.30745  | 2.02979  | 0.00325  |
| 2327409 | A_19_P00800013             | lincRNA:chr5:88237556-88240804 forward strand                                   | 0.30468  | 2.0169   | 0.00638  |
| 2333402 | A_19_P00317337             | lincRNA:chr2:43325013-43329583 reverse strand                                   | 0.30458  | 2.01642  | 0.00944  |
| 2320721 | A_19_P00808808             | lincRNA:chr5:127385751-127405576 reverse strand                                 | 0.30413  | 2.01433  | 0.00136  |
| 2327489 | A_33_P3246193              | Uncharacterized protein C10orf92 [Source:UniProtKB/Swiss-Pro XM_003119477]      | 0.30395  | 2.01348  | 0.00855  |
| 2335735 | A_33_P3287731 MYST4        | Homo sapiens MYST histone acetyltransferase (monocytic leukemia) NM_012330      | 0.30358  | 2.01176  | 0.00483  |
| 2332117 | A_33_P3219121              | Homo sapiens cDNA FLJ16443 fis, clone BRAMY3004800, highly AK131379             | 0.30343  | 2.01108  | 0.00374  |
| 1145392 | A_23_P355776               | non-protein coding RNA 266B [Source:HGNC Symbol;Acc:38529] XM_002342011         | 0.30248  | 2.00669  | 0.00689  |
| 2319524 | A_19_P00321826             | lincRNA:chr20:37049238-37049736 forward strand                                  | 0.30206  | 2.00474  | 0.00373  |
| 2315891 | A_33_P3387429              | PREDICTED: Homo sapiens similar to translocase of inner mitochondrion XR_019644 | 0.30155  | 2.00238  | 0.00407  |
| 2320504 | A_19_P00317913             | lincRNA:chr6:29706528-29716826 reverse strand                                   | 0.30121  | 2.00084  | 0.00805  |
| 2333066 | A_33_P3400309              | Homo sapiens cDNA FLJ40251 fis, clone TEST12024283. [AK0975 AK097570]           | -0.3011  | -2.00034 | 0.00137  |
| 2323230 | A_19_P00806601             | lincRNA:chr8:67304071-67319246 forward strand                                   | -0.30233 | -2.006   | 0.00436  |
| 2316746 | A_33_P3229809 FLJ25363     | Homo sapiens similar to hypothetical protein FLJ25976 (FLJ2536; NM_001145553)   | -0.3024  | -2.00632 | 0.00267  |
| 2320006 | A_33_P3323939 LIPN         | Homo sapiens lipase, family member N (LIPN), mRNA [NM_001102 NM_001102469]      | -0.30316 | -2.00985 | 0.00002  |
| 2319827 | A_33_P3326416 GPR179       | Homo sapiens G protein-coupled receptor 179 (GPR179), mRNA [NM_001004334]       | -0.30334 | -2.01068 | 0.00222  |
| 2324373 | A_19_P00321710             | lincRNA:chr7:32957013-32961211 forward strand                                   | -0.30345 | -2.01116 | 0.00797  |
| 2324141 | A_33_P3418511 HTA          | Homo sapiens hypothetical LOC283902 (HTA), non-coding RNA [NR_027756]           | -0.30442 | -2.0157  | 0.00209  |
| 1166480 | A_24_P48627 PIAS4          | protein inhibitor of activated STAT, 4 [Source:HGNC Symbol;Acc: AK022481]       | -0.30447 | -2.01592 | 2.05E-10 |
| 2332902 | A_19_P00812871             | lincRNA:chr14:74163472-74168555 reverse strand                                  | -0.30526 | -2.01958 | 0.00289  |
| 2331007 | A_19_P00327864             | lincRNA:chr12:48153483-48166083 reverse strand                                  | -0.30568 | -2.02151 | 0.0056   |
| 1159679 | A_23_P71328 MATN2          | Homo sapiens matrilin 2 (MATN2), transcript variant 2, mRNA [NM_030583]         | -0.30572 | -2.0217  | 0.00448  |
| 886189  | A_23_P127697               | olfactory receptor, family 5, subfamily AQ, member 1 pseudogene AB529247        | -0.30588 | -2.02247 | 0.00849  |
| 1163553 | A_23_P386320 MFI2          | Homo sapiens antigen p97 (melanoma associated) identified by mc NM_033316       | -0.30595 | -2.02281 | 0.00476  |
| 2326104 | A_33_P3268234 KRT39        | Homo sapiens keratin 39 (KRT39), mRNA [NM_213656] NM_213656                     | -0.30805 | -2.0326  | 0.00569  |
| 2312858 | A_19_P00802546             | lincRNA:chrX:103436994-103445194 forward strand                                 | -0.3084  | -2.03422 | 5.64E-08 |
| 2315997 | A_19_P00806685             | lincRNA:chr5:85742844-85867089 forward strand                                   | -0.30912 | -2.03762 | 0.00015  |
| 2321196 | A_33_P3324655 C8orf41      | Homo sapiens chromosome 8 open reading frame 41 (C8orf41), tr NM_025115         | -0.30936 | -2.03872 | 8.06E-08 |
| 880762  | A_23_P8913 CA2             | Homo sapiens carbonic anhydrase II (CA2), mRNA [NM_000067] NM_000067            | -0.31018 | -2.04259 | 0.00003  |
| 2317667 | A_19_P00330453             | lincRNA:chr8:69903546-69930946 forward strand                                   | -0.31064 | -2.04474 | 0.00037  |
| 1158004 | A_24_P417586 FLYWCH2       | Homo sapiens FLYWCH family member 2 (FLYWCH2), transcript v NM_138439           | -0.31304 | -2.05609 | 9.37E-06 |
| 1150076 | A_32_P144342 PARP4         | Homo sapiens poly (ADP-ribose) polymerase family, member 4 (P) NM_006437        | -0.31308 | -2.05629 | 7.73E-11 |
| 2336190 | A_19_P00320927             | lincRNA:chr12:1612439-1613590 forward strand                                    | -0.31309 | -2.05632 | 0.00003  |
| 2321673 | A_19_P00320725             | lincRNA:chr2:224569462-224588757 reverse strand                                 | -0.31318 | -2.05677 | 0.0011   |
| 880364  | A_24_P150791 JPH3          | Homo sapiens junctophilin 3 (JPH3), mRNA [NM_020655] NM_020655                  | -0.31472 | -2.06404 | 0.0051   |
| 2328505 | A_33_P3219454              | Unknown                                                                         | -0.31489 | -2.06488 | 3.48E-06 |
| 2328114 | A_33_P3251640 LOC284440    | Homo sapiens hypothetical LOC284440 (LOC284440), non-coding NR_026956           | -0.31516 | -2.06614 | 0.0014   |
| 1137083 | A_23_P28042 ZNF737         | Homo sapiens zinc finger protein 737 (ZNF737), mRNA [NM_00115 NM_001159293]     | -0.31569 | -2.06866 | 3.53E-06 |
| 1156743 | A_24_P353619 ALPL          | Homo sapiens alkaline phosphatase, liver/bone/kidney (ALPL), tra NM_000478      | -0.31614 | -2.07083 | 1.27E-06 |
| 1142797 | A_32_P187683 ZNF596        | Homo sapiens zinc finger protein 596 (ZNF596), transcript variant NM_001042416  | -0.3171  | -2.07541 | 6.29E-06 |
| 2321381 | A_19_P00316050             | lincRNA:chr7:130597213-130598373 forward strand                                 | -0.3172  | -2.07588 | 0.0078   |
| 885220  | A_23_P79360 NOSTRIN        | Homo sapiens nitric oxide synthase trafficker (NOSTRIN), transcri NM_052946     | -0.31759 | -2.07774 | 0.00333  |
| 2312589 | A_33_P3254751 LOC100131355 | Homo sapiens cDNA FLJ42223 fis, clone THYMU2039989. [AK124 AK124217]            | -0.31775 | -2.07848 | 6.25E-06 |
| 2324016 | A_33_P3324228              | similar to hCG1645603 (LOC732275), non-coding RNA [Source:Re AL137562]          | -0.31809 | -2.08012 | 0.00476  |
| 1139911 | A_24_P138868 SLC8A1        | Homo sapiens solute carrier family 8 (sodium/calcium exchanger), NM_021097      | -0.31844 | -2.08179 | 0.00161  |
| 1147915 | A_23_P419764               | Homo sapiens mRNA; cDNA DKFZp761B107 (from clone DKFZp761B107) AL834257         | -0.31915 | -2.0852  | 9.43E-06 |
| 1146751 | A_23_P251881 NCR3          | Homo sapiens natural cytotoxicity triggering receptor 3 (NCR3), tr NM_147130    | -0.31926 | -2.08573 | 0.00003  |
| 2325344 | A_33_P3345623 RREB1        | Homo sapiens ras responsive element binding protein 1 (RREB1), NM_001003700     | -0.31938 | -2.08632 | 0.00049  |
| 1160389 | A_23_P340019 NLR3          | Homo sapiens NLR family, CARD domain containing 3 (NLR3), m NM_178844           | -0.3198  | -2.08832 | 0.00004  |
| 2313683 | A_33_P3276758              | Unknown                                                                         | -0.32027 | -2.09059 | 0.00277  |
| 2329943 | A_19_P00806723             | lincRNA:chr16:72454899-72460874 forward strand                                  | -0.32097 | -2.09397 | 0.00157  |
| 2326697 | A_19_P00812923             | lincRNA:chr11:3402374-3408174 reverse strand                                    | -0.32205 | -2.09919 | 0.00129  |
| 2330783 | A_19_P00803630             | lincRNA:chr8:2522118-2527693 forward strand                                     | -0.32471 | -2.11206 | 2.86E-06 |
| 1154776 | A_23_P377245               | Homo sapiens full length insert cDNA clone YR69B11. [AF085941] BC042172         | -0.32542 | -2.11551 | 8.99E-06 |
| 2319965 | A_19_P00330834             | lincRNA:chr10:65236089-65272719 forward strand                                  | -0.3256  | -2.11643 | 4.92E-06 |

Supplementary Table 1. Continued.

|         |                |              |                                                                                     |          |          |          |
|---------|----------------|--------------|-------------------------------------------------------------------------------------|----------|----------|----------|
| 884591  | A_23_P14892    | IGFALS       | Homo sapiens insulin-like growth factor binding protein, acid labile NM_004970      | -0.32607 | -2.11872 | 0.00959  |
| 2312644 | A_33_P3333033  | SGSM2        | Homo sapiens cDNA FLJ42893 fis, clone BRHIP3008598, [AK124E AK124883                | -0.32609 | -2.11882 | 1.79E-06 |
| 1152414 | A_24_P122636   | BPNT1        | Homo sapiens 3'(2'), 5'-biphosphate nucleotidase 1 (BPNT1), mR NM_006085            | -0.32649 | -2.12075 | 2.32E-06 |
| 2319047 | A_33_P3345309  | LOC646960    | Homo sapiens trypsin serine protease-like (LOC646960), mRNA [I NM_001195129         | -0.32649 | -2.12077 | 0.00358  |
| 2326452 | A_19_P00812589 |              | lincRNA:chr13:36789625-36798125 forward strand                                      | -0.32725 | -2.12446 | 0.0007   |
| 2313913 | A_33_P3356811  | LCE1E        | Homo sapiens late cornified envelope 1E (LCE1E), mRNA [NM_17E NM_178353             | -0.32778 | -2.12708 | 1.64E-06 |
| 1139320 | A_23_P13683    | ZBTB39       | Homo sapiens zinc finger and BTB domain containing 39 (ZBTB39 NM_014830             | -0.32802 | -2.12824 | 5.17E-06 |
| 2316464 | A_33_P3235706  |              | zinc finger, CCHC domain containing 11 [Source:HGNC Symbol;Ac BC048301              | -0.32833 | -2.12976 | 0.00001  |
| 2318598 | A_33_P3343605  |              | Unknown                                                                             | -0.32915 | -2.13378 | 1.51E-06 |
| 2335379 | A_33_P3351536  | PTK2B        | Homo sapiens PTK2B protein tyrosine kinase 2 beta (PTK2B), tra NM_173174            | -0.32966 | -2.13631 | 0.00865  |
| 2334377 | A_19_P00806946 |              | lincRNA:chr1:173758702-173765627 reverse strand                                     | -0.33055 | -2.14066 | 0.00032  |
| 2320523 | A_19_P00810827 |              | lincRNA:chr1:192885227-192945802 forward strand                                     | -0.3312  | -2.14386 | 0.00252  |
| 2329440 | A_19_P00327017 |              | lincRNA:chr8:28543756-28558056 reverse strand                                       | -0.33165 | -2.14611 | 0.00876  |
| 2332298 | A_19_P00329303 |              | lincRNA:chr4:127694975-127709825 reverse strand                                     | -0.33198 | -2.14775 | 0.0014   |
| 2320732 | A_33_P3396089  | SLC38A6      | Homo sapiens solute carrier family 38, member 6 (SLC38A6), tra NM_153811            | -0.33215 | -2.14857 | 2.03E-06 |
| 1141449 | A_23_P132889   | GRMP1        | Homo sapiens collapsin response mediator protein 1 (GRMP1), tra NM_001014809        | -0.33355 | -2.15553 | 4.59E-07 |
| 2329340 | A_19_P00322975 |              | lincRNA:chr20:37049312-37059741 forward strand                                      | -0.33455 | -2.16047 | 7.13E-06 |
| 2318030 | A_19_P00802866 |              | lincRNA:chr1:42389413-42495113 forward strand                                       | -0.33457 | -2.16056 | 0.00009  |
| 878851  | A_23_P131208   | NR4A2        | Homo sapiens nuclear receptor subfamily 4, group A, member 2 (NR4A2 NM_006186       | -0.33585 | -2.16693 | 0.00335  |
| 878842  | A_23_P124108   | ITGAM        | Homo sapiens integrin, alpha M (complement component 3 receptor 1) (ITGAM NM_000632 | -0.33597 | -2.16757 | 1.26E-32 |
| 887147  | A_23_P124252   | CAMK1D       | Homo sapiens calcium/calmodulin-dependent protein kinase ID (C NM_020397            | -0.33601 | -2.16777 | 3.03E-06 |
| 2332182 | A_19_P00808719 |              | lincRNA:chr1:9228160-9228603 forward strand                                         | -0.33623 | -2.16886 | 0.00103  |
| 2325542 | A_19_P00330262 |              | lincRNA:chr5:171274195-171288320 reverse strand                                     | -0.33626 | -2.16902 | 0.00009  |
| 2329734 | A_19_P00319175 |              | lincRNA:chr5:126187125-126189758 forward strand                                     | -0.33656 | -2.17049 | 0.00072  |
| 2327567 | A_19_P00316097 |              | lincRNA:chr18:5245991-5246806 reverse strand                                        | -0.33659 | -2.17064 | 7.71E-06 |
| 2326802 | A_33_P3262022  |              | Unknown                                                                             | -0.33674 | -2.17139 | 1.91E-06 |
| 1164201 | A_23_P56288    | LENG8        | Homo sapiens leukocyte receptor cluster (LRC) member 8 (LENG8 NM_052925             | -0.33675 | -2.17146 | 1.10E-06 |
| 1157338 | A_32_P142440   | PCSK9        | Homo sapiens proprotein convertase subtilisin/kexin type 9 (PCSK9 NM_174936         | -0.33681 | -2.17177 | 0.00004  |
| 2322964 | A_33_P3231262  | LOC257396    | Homo sapiens hypothetical LOC257396 (LOC257396), non-coding NR_034107               | -0.33751 | -2.17526 | 0.0067   |
| 2324351 | A_19_P00811084 |              | lincRNA:chr2:200984605-201020245 forward strand                                     | -0.33784 | -2.17692 | 9.95E-07 |
| 1166471 | A_23_P407206   | GLN8         | Homo sapiens ceroid-lipofuscinosis, neuronal 8 (epilepsy, progress NM_018941        | -0.33835 | -2.17944 | 1.46E-11 |
| 1139034 | A_32_P159334   | RECQL        | Homo sapiens RecQ protein-like (DNA helicase Q1-like) (RECQL) NM_002907             | -0.33842 | -2.17983 | 4.25E-11 |
| 2315600 | A_19_P00801307 |              | lincRNA:chr13:87525274-87925249 reverse strand                                      | -0.3393  | -2.18423 | 0.00001  |
| 880833  | A_24_P274814   | TBXAS1       | Homo sapiens thromboxane A synthase 1 (platelet) (TBXAS1), tra NM_030984            | -0.33976 | -2.18656 | 3.92E-12 |
| 1146624 | A_23_P145681   | ACTL6B       | Homo sapiens actin-like 6B (ACTL6B), mRNA [NM_016188] NM_016188                     | -0.3407  | -2.19127 | 7.28E-06 |
| 2332150 | A_19_P00315571 |              | lincRNA:chr18:2517269-2519259 reverse strand                                        | -0.34092 | -2.19238 | 0.00849  |
| 887527  | A_24_P88991    | TRAF1        | Homo sapiens TNF receptor-associated factor 1 (TRAF1), transcr NM_005658            | -0.34128 | -2.19423 | 4.77E-08 |
| 2314425 | A_33_P3360758  |              | potassium voltage-gated channel, KQT-like subfamily, member 2 [Source:HGNC Sy       | -0.34171 | -2.19638 | 2.35E-06 |
| 1150043 | A_24_P205036   | ZNF676       | Homo sapiens zinc finger protein 676 (ZNF676), mRNA [NM_0010C NM_001001411          | -0.34204 | -2.19804 | 1.33E-06 |
| 1161151 | A_23_P159893   | CHRD1        | Homo sapiens chordin-like 1 (CHRD1), transcript variant 3, mRN NM_145234            | -0.34208 | -2.19824 | 0.00318  |
| 2325362 | A_33_P3371318  |              | Homo sapiens cDNA clone IMAGE:4358137, with apparent retained BC066548              | -0.34228 | -2.19927 | 0.00141  |
| 2321597 | A_33_P3366412  |              | Unknown                                                                             | -0.34383 | -2.20713 | 0.00078  |
| 2329251 | A_33_P3319791  | NR4A1        | Homo sapiens nuclear receptor subfamily 4, group A, member 1 (NR4A1 NM_002135       | -0.34413 | -2.20865 | 4.20E-09 |
| 2331481 | A_19_P00329574 |              | lincRNA:chr5:1544500-1567142 reverse strand                                         | -0.34516 | -2.2139  | 6.17E-07 |
| 2336090 | A_19_P00328880 |              | lincRNA:chr11:117668490-117680359 reverse strand                                    | -0.34518 | -2.214   | 7.25E-06 |
| 2320078 | A_33_P3390217  |              | tubulin tyrosine ligase-like family, member 9 [Source:HGNC Symbol;BC104025          | -0.34587 | -2.21755 | 0.00029  |
| 1159863 | A_24_P323967   | ZNF880       | Homo sapiens zinc finger protein 880 (ZNF880), mRNA [NM_00114 NM_001145434          | -0.34594 | -2.2179  | 7.56E-07 |
| 2327886 | A_19_P00325682 |              | lincRNA:chr14:61529972-61553247 forward strand                                      | -0.34638 | -2.22012 | 5.49E-07 |
| 882336  | A_23_P157404   | AP1S1        | Homo sapiens adaptor-related protein complex 1, sigma 1 subunit NM_001283           | -0.34648 | -2.22064 | 1.41E-12 |
| 2315161 | A_33_P3327270  | TMED7-TICAM2 | Homo sapiens TMED7-TICAM2 readthrough (TMED7-TICAM2), tr NM_001164469               | -0.34712 | -2.22391 | 5.19E-07 |
| 1146523 | A_23_P127013   | TCF7L2       | Homo sapiens transcription factor 7-like 2 (T-cell specific, HMG-I NM_030756        | -0.34756 | -2.22616 | 6.77E-12 |
| 885298  | A_24_P215804   | CKLF         | Homo sapiens chemokine-like factor (OKLF), transcript variant 1, NM_016951          | -0.34763 | -2.22652 | 1.23E-12 |
| 2315334 | A_19_P00800270 |              | lincRNA:chr2:152827254-152853279 reverse strand                                     | -0.34872 | -2.23212 | 0.00662  |
| 2326969 | A_33_P3329187  | DNMT1        | Homo sapiens DNA (cytosine-5)-methyltransferase 1 (DNMT1), t NM_001130823           | -0.34882 | -2.23264 | 1.04E-12 |
| 869932  | A_23_P214080   | EGR1         | Homo sapiens early growth response 1 (EGR1), mRNA [NM_00196 NM_001964               | -0.35136 | -2.24573 | 8.70E-13 |
| 1162429 | A_23_P34233    | QPRT         | Homo sapiens quinolinate phosphoribosyltransferase (QPRT), mRN NM_014298            | -0.35258 | -2.25206 | 0.00004  |
| 2329830 | A_19_P00802433 |              | lincRNA:chr6:53480866-53497141 forward strand                                       | -0.35472 | -2.26317 | 0.0004   |
| 1161430 | A_23_P370479   | POFUT1       | Homo sapiens protein O-fucosyltransferase 1 (POFUT1), transcrip NM_015352           | -0.35475 | -2.26332 | 5.61E-07 |
| 1163490 | A_24_P161813   | LOC441666    | Homo sapiens zinc finger protein 91 pseudogene (LOC441666), no NR_024380            | -0.3554  | -2.26672 | 3.34E-07 |
| 2334317 | A_19_P00807833 |              | lincRNA:chr7:45983575-46089425 forward strand                                       | -0.35691 | -2.27462 | 0.00002  |
| 2314616 | A_19_P00809136 |              | lincRNA:chr21:36977805-37010580 reverse strand                                      | -0.35753 | -2.27789 | 5.50E-06 |
| 2335485 | A_19_P00318845 |              | lincRNA:chr10:4284540-4284771 reverse strand                                        | -0.3578  | -2.27928 | 0.00204  |
| 1143185 | A_23_P353514   | MSL3         | Homo sapiens male-specific lethal 3 homolog (Drosophila) (MSL3) NM_078628           | -0.35848 | -2.28287 | 1.37E-06 |
| 2327419 | A_19_P00319269 |              | lincRNA:chr18:37321093-37380224 reverse strand                                      | -0.35986 | -2.29014 | 0.0042   |
| 2330431 | A_33_P3305250  |              | proteasome (prosome, macropain) 26S subunit, non-ATPase, 5 [Source:HGNC Syn         | -0.3601  | -2.29137 | 0.00183  |
| 2335789 | A_33_P3713035  | LOC221814    | Homo sapiens mRNA; cDNA DKFP564C0371 (from clone DKFPz AL122087                     | -0.36029 | -2.29242 | 0.00025  |
| 2317540 | A_19_P00325785 |              | lincRNA:chr3:162922581-162942606 reverse strand                                     | -0.36116 | -2.29698 | 0.00072  |
| 2331396 | A_19_P00332459 |              | lincRNA:chr4:24517527-24528051 reverse strand                                       | -0.36121 | -2.29727 | 0.00001  |
| 2326344 | A_33_P3357431  |              | Novel protein (FLJ40547) [Source:UniProtKB/TrEMBL;Acc:Q5VZ XR_112173                | -0.36479 | -2.3163  | 0.00092  |
| 887603  | A_23_P44849    | KCTD13       | Homo sapiens potassium channel tetramerisation domain containi NM_178863            | -0.36513 | -2.31809 | 0.00014  |
| 2320500 | A_33_P3305438  |              | Unknown                                                                             | -0.36599 | -2.32267 | 2.19E-07 |
| 1168278 | A_23_P23966    | ZNF488       | Homo sapiens zinc finger protein 488 (ZNF488), mRNA [NM_15303 NM_153034             | -0.36704 | -2.32829 | 0.00149  |

Supplementary Table 1. Continued.

|         |                |              |                                                                               |           |          |          |          |
|---------|----------------|--------------|-------------------------------------------------------------------------------|-----------|----------|----------|----------|
| 2318904 | A_33_P3417459  | SCARNA9L     | Homo sapiens small Cajal body-specific RNA 9-like (retrotransposon)           | NR_023358 | -0.3678  | -2.3324  | 1.55E-07 |
| 2322027 | A_33_P3265415  |              | Unknown                                                                       |           | -0.369   | -2.33882 | 1.41E-07 |
| 2327883 | A_19_P00813006 |              | lincRNA:chr4:53578624-53580302 reverse strand                                 |           | -0.36914 | -2.33956 | 6.42E-07 |
| 1163109 | A_32_P125832   | LOC100128893 | PREDICTED: Homo sapiens hypothetical LOC100128893 (LOC10C XR_109470           |           | -0.36919 | -2.33984 | 0.00383  |
| 1160021 | A_23_P309950   |              | family with sequence similarity 178, member A [Source:HGNC Syn AL833126       |           | -0.36927 | -2.34027 | 0.00318  |
| 1143819 | A_23_P41304    | GYPE         | Homo sapiens glycoporphin E (MNS blood group) (GYPE), transcript NM_002102    |           | -0.36932 | -2.34054 | 0.00089  |
| 1145693 | A_24_P6428     | C20orf177    | Homo sapiens chromosome 20 open reading frame 177 (C20orf177), NM_022106      |           | -0.37038 | -2.34629 | 0.00048  |
| 2316705 | A_19_P00331004 |              | lincRNA:chr2:8001249-8036724 reverse strand                                   |           | -0.37089 | -2.34904 | 0.00003  |
| 883591  | A_23_P50039    | MC5R         | Homo sapiens melanocortin 5 receptor (MC5R), mRNA [NM_00591 NM_005913         |           | -0.37217 | -2.35597 | 0.00725  |
| 2320503 | A_19_P00325227 |              | lincRNA:chr1:234908002-234918952 forward strand                               |           | -0.37238 | -2.3571  | 1.16E-07 |
| 885303  | A_23_P82651    | NPTX2        | Homo sapiens neuronal pentraxin II (NPTX2), mRNA [NM_002523] NM_002523        |           | -0.37444 | -2.36829 | 0.00636  |
| 1153129 | A_24_P357169   | EPPK1        | Homo sapiens epiplakin 1 (EPPK1), mRNA [NM_031308] NM_031308                  |           | -0.37482 | -2.37042 | 0.00121  |
| 2314514 | A_33_P3323058  |              | Homo sapiens cDNA, FLJ97323, [AK307375] AK307375                              |           | -0.37539 | -2.3735  | 0.0059   |
| 2336336 | A_33_P3224730  |              | hemimentin 2 [Source:HGNC Symbol;Acc:21293] [ENST000003024 AK128680           |           | -0.37901 | -2.39335 | 6.38E-06 |
| 2323387 | A_19_P00319756 |              | lincRNA:chr18:54953016-54959126 forward strand                                |           | -0.3795  | -2.39608 | 0.00921  |
| 2330857 | A_33_P3274754  | LOC100131434 | Homo sapiens hypothetical LOC100131434 (LOC100131434), non- NR_027455         |           | -0.38064 | -2.40238 | 0.00037  |
| 1140655 | A_24_P402415   | SYT14        | Homo sapiens synaptotagmin XIV (SYT14), transcript variant 4, ml NM_153262    |           | -0.38123 | -2.40564 | 0.00492  |
| 2318701 | A_33_P3213832  |              | PREDICTED: Homo sapiens hypothetical LOC100130882 (LOC10C XM_001715346        |           | -0.38163 | -2.40785 | 0.0077   |
| 2312755 | A_33_P3359183  | AWAT2        | Homo sapiens acyl-CoA wax alcohol acyltransferase 2 (AWAT2), r NM_001002254   |           | -0.38704 | -2.43805 | 0.0073   |
| 2329693 | A_19_P00329395 |              | lincRNA:chr6:56922016-56934541 reverse strand                                 |           | -0.38762 | -2.44131 | 0.00016  |
| 1145990 | A_32_P180741   | TNK2         | Homo sapiens tyrosine kinase, non-receptor, 2 (TNK2), transcript NM_001010938 |           | -0.38787 | -2.44269 | 0.00059  |
| 2319028 | A_19_P00806762 |              | lincRNA:chrX:73043635-73044133 forward strand                                 |           | -0.38787 | -2.44271 | 0.00194  |
| 2331530 | A_19_P00324780 |              | lincRNA:chr6:151713007-151720482 forward strand                               |           | -0.38899 | -2.44901 | 5.07E-08 |
| 2335618 | A_33_P3285945  | GCL21        | Homo sapiens chemokine (C-C motif) ligand 21 (GCL21), mRNA [NM_002989         |           | -0.3892  | -2.45019 | 0.00006  |
| 2326442 | A_33_P3383816  | LOC400657    | Homo sapiens hypothetical LOC400657 (LOC400657), non-coding NR_024484         |           | -0.38987 | -2.45395 | 0.0009   |
| 2326907 | A_33_P3267482  | KIAA1804     | Homo sapiens mixed lineage kinase 4 (KIAA1804), mRNA [NM_032 NM_032435        |           | -0.39131 | -2.46212 | 3.76E-08 |
| 2329628 | A_33_P3813818  | LOC100505510 | PREDICTED: Homo sapiens hypothetical protein LOC100505510 ( XM_003118976      |           | -0.39253 | -2.46904 | 0.00325  |
| 2328715 | A_33_P3369731  |              | Unknown                                                                       |           | -0.39403 | -2.4776  | 1.34E-06 |
| 2335508 | A_19_P00322909 |              | lincRNA:chr18:53709435-53763540 reverse strand                                |           | -0.39492 | -2.48269 | 0.00001  |
| 1156882 | A_23_P307502   | C9orf53      | Homo sapiens chromosome 9 open reading frame 53 (C9orf53), no NR_024274       |           | -0.3952  | -2.48426 | 0.0029   |
| 2328855 | A_33_P3210228  |              | zinc finger, CCHC domain containing 6 [Source:HGNC Symbol;Acc:25817] [ENST00  |           | -0.39536 | -2.4852  | 0.00542  |
| 2335507 | A_19_P00810151 |              | lincRNA:chr2:134879255-134978205 forward strand                               |           | -0.39538 | -2.4853  | 0.00342  |
| 1146316 | A_24_P522631   | TMEM201      | Homo sapiens transmembrane protein 201 (TMEM201), transcript NM_001130924     |           | -0.39548 | -2.48587 | 2.93E-08 |
| 2329326 | A_33_P3210349  |              | cDNA FLJ44904 fis, clone BRAMY3005656 [Source:UniProtKB/T XNR_111612          |           | -0.39561 | -2.48664 | 0.00039  |
| 2316242 | A_33_P3349384  |              | Unknown                                                                       |           | -0.39657 | -2.49213 | 6.46E-07 |
| 2327596 | A_33_P3220857  |              | UPF0553 protein C9orf64 [Source:UniProtKB/Swiss-Prot;Acc:Q5T6V5] [ENST00      |           | -0.39774 | -2.49886 | 0.0007   |
| 1159779 | A_32_P85042    | LOC100132815 | HCG2000535cDNA FLJ32177 fis, clone PLACE6001294 ; [Source: AK056856           |           | -0.39779 | -2.49916 | 0.00001  |
| 2316880 | A_19_P00807856 |              | lincRNA:chr15:79878505-79877083 forward strand                                |           | -0.39942 | -2.50851 | 0.00258  |
| 1144810 | A_32_P232035   | LOC100270746 | Homo sapiens hypothetical LOC100270746 (LOC100270746), non- NR_026776         |           | -0.39966 | -2.50993 | 5.54E-08 |
| 2330341 | A_19_P00329166 |              | lincRNA:chrX:107264119-107280819 forward strand                               |           | -0.39971 | -2.51018 | 4.12E-08 |
| 2315468 | A_33_P3418576  |              | serine active site containing 1 [Source:HGNC Symbol;Acc:21061] BC048335       |           | -0.4016  | -2.52114 | 0.00294  |
| 2331809 | A_33_P3214052  |              | Homo sapiens cDNA clone IMAGE:5266307, [BC035182] BC035182                    |           | -0.40167 | -2.52155 | 0.00001  |
| 1148676 | A_24_P163237   | STOX2        | Homo sapiens storkhead box 2 (STOX2), mRNA [NM_020225] NM_020225              |           | -0.40211 | -2.52413 | 0.0005   |
| 2322749 | A_33_P3383626  | ZSCAN5D      | PREDICTED: Homo sapiens zinc finger and SCAN domain containi XM_001725568     |           | -0.40265 | -2.52724 | 0.00079  |
| 2334192 | A_33_P3213712  |              | Unknown                                                                       |           | -0.40387 | -2.53438 | 0.00006  |
| 2327189 | A_33_P3297651  | LOC100130540 | Homo sapiens cDNA FLJ43078 fis, clone BRTHA3016845, [AK125 AK125068           |           | -0.40389 | -2.5345  | 0.00146  |
| 2318457 | A_33_P3273000  | PTK2B        | Homo sapiens cDNA FLJ46514 fis, clone THYMU3032798, highly AK128371           |           | -0.4039  | -2.53456 | 1.78E-08 |
| 2327360 | A_33_P3270295  | FRS3         | Homo sapiens fibroblast growth factor receptor substrate 3 (FRS3), NM_006653  |           | -0.40517 | -2.54196 | 1.61E-11 |
| 866880  | A_24_P50245    | HLA-DMA      | Homo sapiens major histocompatibility complex, class II, DM alpha NM_006120   |           | -0.40764 | -2.55644 | 0.00028  |
| 2328042 | A_33_P3299872  | HINT3        | Homo sapiens histidine triad nucleotide binding protein 3 (HINT3), NM_138571  |           | -0.4083  | -2.56034 | 1.38E-08 |
| 2328930 | A_19_P00808319 |              | lincRNA:chr12:68383224-68415107 forward strand                                |           | -0.40849 | -2.56146 | 0.00356  |
| 1150263 | A_24_P67585    | VGLL3        | Homo sapiens vestigial like 3 (Drosophila) (VGLL3), mRNA [NM_01 NM_016206     |           | -0.41185 | -2.58136 | 1.21E-08 |
| 2335532 | A_19_P00323968 |              | lincRNA:chr19:22019985-22034034 forward strand                                |           | -0.41309 | -2.58874 | 0.00445  |
| 2329029 | A_33_P3300635  | PFKFB2       | Homo sapiens 6-phosphofructo-2-kinase/fructose-2,6-biphospha NM_006212        |           | -0.41322 | -2.58954 | 5.99E-16 |
| 880525  | A_23_P366376   | TDGF1        | Homo sapiens teratocarcinoma-derived growth factor 1 (TDGF1), NM_003212       |           | -0.41399 | -2.59412 | 0.00065  |
| 1142265 | A_24_P704878   |              | Unknown                                                                       |           | -0.41571 | -2.60439 | 0.00662  |
| 2330210 | A_33_P3229472  | KRTAP5-10    | Homo sapiens keratin associated protein 5-10 (KRTAP5-10), mRNA NM_001012710   |           | -0.41593 | -2.60571 | 0.00763  |
| 2332458 | A_33_P3221960  | IL18RAP      | Homo sapiens interleukin 18 receptor accessory protein (IL18RAP), NM_003853   |           | -0.41636 | -2.60833 | 8.97E-09 |
| 2318939 | A_19_P00812662 |              | lincRNA:chr12:5377839-5428564 reverse strand                                  |           | -0.41894 | -2.62386 | 2.51E-08 |
| 2327171 | A_33_P3251871  |              | Unknown                                                                       |           | -0.41912 | -2.62492 | 1.19E-08 |
| 2323389 | A_33_P3320533  |              | full-length cDNA clone CSODJ015YB09 of T cells (Jurkat cell line CR594845     |           | -0.41983 | -2.62925 | 0.00405  |
| 2322314 | A_33_P3797403  | LOC283387    | Homo sapiens hypothetical protein LOC283387, mRNA (cDNA clon BC032840         |           | -0.42037 | -2.63248 | 0.00308  |
| 1140270 | A_23_P13294    | OR1S2        | Homo sapiens olfactory receptor, family 1, subfamily S, member 2 NM_001004459 |           | -0.42161 | -2.64002 | 0.001    |
| 1139721 | A_24_P187614   | LOC100129648 | Homo sapiens cDNA FLJ40318 fis, clone TEST12030556, [AK0976 AK097637          |           | -0.42292 | -2.64801 | 0.00366  |
| 2319651 | A_33_P3277883  | LOC100129931 | Homo sapiens hypothetical LOC100129931 (LOC100129931), non- NR_033828         |           | -0.42348 | -2.65141 | 0.00053  |
| 1154881 | A_23_P403284   | OTX1         | Homo sapiens orthodenticle homeobox 1 (OTX1), transcript varian NM_014562     |           | -0.42478 | -2.6594  | 0.00036  |
| 2316725 | A_33_P3329712  |              | Unknown                                                                       |           | -0.43016 | -2.6925  | 0.00108  |
| 2313209 | A_19_P00804779 |              | lincRNA:chr4:47840518-47846712 forward strand                                 |           | -0.43104 | -2.69801 | 0.0002   |
| 1156906 | A_23_P69970    | SOX30        | Homo sapiens SRY (sex determining region Y)-box 30 (SOX30), tr NM_178424      |           | -0.4316  | -2.70148 | 0.00017  |
| 1161897 | A_24_P358868   | ZNF728       | PREDICTED: Homo sapiens zinc finger protein 728 (ZNF728), mRN XM_001720936    |           | -0.43329 | -2.71201 | 3.60E-09 |
| 2331653 | A_19_P00328318 |              | lincRNA:chr2:42562846-42574346 forward strand                                 |           | -0.43405 | -2.71673 | 0.00001  |
| 1140043 | A_23_P416314   | HRASLS5      | Homo sapiens HRAS-like suppressor family, member 5 (HRASLS5), NM_054108       |           | -0.43644 | -2.73177 | 2.63E-09 |



Supplementary Table 1. Continued.

|         |                |                                                                            |                                                                                                               |          |          |          |
|---------|----------------|----------------------------------------------------------------------------|---------------------------------------------------------------------------------------------------------------|----------|----------|----------|
| 2319478 | A_19_P00802496 | lincRNA:chr8:16347304-16355399 reverse strand                              | -0.43718                                                                                                      | -2.73639 | 4.25E-09 |          |
| 2324838 | A_19_P00806973 | lincRNA:chr2:37325696-37331035 forward strand                              | -0.43895                                                                                                      | -2.74757 | 0.00403  |          |
| 1159879 | A_23_P357966   | PCMTD1                                                                     | Homo sapiens protein-L-isoaspartate (D-aspartate) O-methyltransferase (PCMTD1), mRNA [NM_012426]              | -0.43899 | -2.74782 | 3.35E-06 |
| 2321374 | A_23_P3267562  | VAX2                                                                       | Homo sapiens ventral anterior homeobox 2 (VAX2), mRNA [NM_012426]                                             | -0.44038 | -2.75663 | 2.15E-09 |
| 884452  | A_23_P348028   | IL1F6                                                                      | Homo sapiens interleukin 1 family, member 6 (epsilon) (IL1F6), mRNA [NM_014440]                               | -0.44068 | -2.75854 | 0.00943  |
| 2336353 | A_33_P3629247  | ANKMY1                                                                     | Homo sapiens ankyrin repeat and MYND domain containing 1 (ANKMY1), mRNA [NM_017844]                           | -0.44345 | -2.77623 | 2.14E-09 |
| 2335098 | A_19_P00812874 | lincRNA:chr14:91315547-91326047 reverse strand                             | -0.44668                                                                                                      | -2.78689 | 5.05E-06 |          |
| 2316535 | A_33_P3264444  | Prefoldin subunit 6 (Protein Ke2) [Source:UniProtKB/Swiss-Prot; CR609151]  | -0.44982                                                                                                      | -2.8159  | 1.25E-09 |          |
| 1167425 | A_24_P717262   | LOC100131479                                                               | PREDICTED: Homo sapiens zinc finger protein 430-like (LOC1001 XM_001715121)                                   | -0.45234 | -2.83361 | 0.00001  |
| 2325843 | A_19_P00319889 | lincRNA:chr2:224569352-224588757 reverse strand                            | -0.45366                                                                                                      | -2.84227 | 0.00546  |          |
| 2333082 | A_19_P00802597 | lincRNA:chr11:18610699-18619599 reverse strand                             | -0.45442                                                                                                      | -2.84719 | 0.00484  |          |
| 2330488 | A_33_P3418790  | GNRH2                                                                      | gonadotropin-releasing hormone 2 [Source:HGNC Symbol; Acc:4420] [ENST000003]                                  | -0.45637 | -2.86004 | 0.00444  |
| 2321044 | A_19_P00325965 | lincRNA:chr16:54944999-54959642 reverse strand                             | -0.45769                                                                                                      | -2.8687  | 8.85E-08 |          |
| 2315882 | A_33_P3295096  | NAG20                                                                      | PREDICTED: Homo sapiens NAG20 (NAG20), miscRNA [XR_10882 XR_108823]                                           | -0.46094 | -2.88025 | 0.00486  |
| 2315879 | A_33_P3286923  | TMPRSS5                                                                    | Homo sapiens transmembrane protease, serine 5 (TMPRSS5), mRNA [NM_030770]                                     | -0.46127 | -2.89246 | 0.00643  |
| 881987  | A_23_P365679   | full-length cDNA clone CS0DJ012YO23 of T cells (Jurkat cell line CR622757) | -0.46226                                                                                                      | -2.89907 | 0.00518  |          |
| 2319423 | A_33_P3249529  | PCNX                                                                       | Homo sapiens pecanex homolog (Drosophila) (PCNX), mRNA [NM_014982]                                            | -0.46236 | -2.89974 | 5.89E-10 |
| 1150618 | A_23_P252276   | ARHGEF38                                                                   | Homo sapiens Rho guanine nucleotide exchange factor (GEF) 38 (ARHGEF38), mRNA [NM_017700]                     | -0.46256 | -2.9011  | 0.00038  |
| 882554  | A_23_P149613   | FMO1                                                                       | Homo sapiens flavin containing monooxygenase 1 (FMO1), mRNA [NM_002021]                                       | -0.46387 | -2.90985 | 4.81E-10 |
| 1146573 | A_23_P390443   | SHISA7                                                                     | Homo sapiens shisa homolog 7 (Xenopus laevis) (SHISA7), mRNA [NM_001145176]                                   | -0.46983 | -2.95008 | 0.00245  |
| 882483  | A_24_P160380   | PDLIM2                                                                     | Homo sapiens PDZ and LIM domain 2 (mystique) (PDLIM2), transcript variant 1, mRNA [NM_176871]                 | -0.47024 | -2.95283 | 0.00004  |
| 2314346 | A_33_P3351735  | CDC87                                                                      | Homo sapiens coiled-coil domain containing 87 (CDC87), mRNA [NM_018219]                                       | -0.47198 | -2.9647  | 0.00195  |
| 2334462 | A_33_P3231086  | Unknown                                                                    |                                                                                                               | -0.47307 | -2.97217 | 2.90E-08 |
| 2327176 | A_33_P3232173  | PSPC1                                                                      | paraspeckle component 1 [Source:HGNC Symbol; Acc:20320] [ENSEMBL:BE147842]                                    | -0.4746  | -2.9826  | 1.23E-09 |
| 2313969 | A_19_P00324769 | lincRNA:chrX:113008710-113015135 reverse strand                            | -0.47627                                                                                                      | -2.99411 | 0.00914  |          |
| 2315946 | A_19_P00800214 | lincRNA:chr14:71148522-71171347 reverse strand                             | -0.47658                                                                                                      | -2.99828 | 0.0003   |          |
| 882976  | A_32_P130630   | SLC16A7                                                                    | Homo sapiens solute carrier family 16, member 7 (monocarboxylic acid transporter) (SLC16A7), mRNA [NM_004731] | -0.47792 | -3.00556 | 1.87E-13 |
| 884239  | A_24_P47681    | GAND1                                                                      | Homo sapiens cullin-associated and neddylation-dissociated 1 (GAND1), mRNA [NM_018448]                        | -0.48062 | -3.02427 | 2.58E-19 |
| 2328177 | A_33_P336720   | HAMP                                                                       | Homo sapiens hepcidin antimicrobial peptide (HAMP), mRNA [NM_021175]                                          | -0.48171 | -3.03187 | 3.03E-19 |
| 1159870 | A_23_P83579    | ARNT2                                                                      | Homo sapiens aryl-hydrocarbon receptor nuclear translocator 2 (ARNT2), mRNA [NM_014862]                       | -0.48216 | -3.03503 | 8.03E-15 |
| 2335200 | A_19_P00812263 | lincRNA:chr7:112747264-112798839 reverse strand                            | -0.48264                                                                                                      | -3.03833 | 0.00374  |          |
| 1159504 | A_32_P216734   | SPDYE3                                                                     | Homo sapiens speedy homolog E3 (Xenopus laevis) (SPDYE3), mRNA [NM_001004351]                                 | -0.48489 | -3.05417 | 0.00394  |
| 1141478 | A_24_P91701    | C22orf43                                                                   | Homo sapiens chromosome 22 open reading frame 43 (C22orf43), mRNA [NM_016449]                                 | -0.48563 | -3.05939 | 1.80E-10 |
| 1145439 | A_23_P50232    | AURKC                                                                      | Homo sapiens aurora kinase C (AURKC), transcript variant 1, mRNA [NM_001015878]                               | -0.48697 | -3.06881 | 4.25E-09 |
| 2312852 | A_33_P3410232  | LY6G6E                                                                     | Homo sapiens lymphocyte antigen 6 complex, locus G6E (LY6G6E), mRNA [NM_024541]                               | -0.48702 | -3.06918 | 0.00769  |
| 1143171 | A_24_P175187   | SAMD9                                                                      | Homo sapiens sterile alpha motif domain containing 9 (SAMD9), transcript variant 1, mRNA [NM_017654]          | -0.48717 | -3.07019 | 3.71E-08 |
| 2330830 | A_19_P00812238 | lincRNA:chr7:106416539-106423571 reverse strand                            | -0.48724                                                                                                      | -3.07074 | 0.00749  |          |
| 1148028 | A_23_P155463   | LRRC2                                                                      | Homo sapiens leucine rich repeat containing 2 (LRRC2), mRNA [NM_024512]                                       | -0.48728 | -3.071   | 8.04E-10 |
| 1161777 | A_32_P831725   | C3orf62                                                                    | Homo sapiens chromosome 3 open reading frame 62 (C3orf62), mRNA [NM_198562]                                   | -0.48868 | -3.08091 | 0.00019  |
| 2328147 | A_19_P00317828 | lincRNA:chr7:98279734-98293576 reverse strand                              | -0.48945                                                                                                      | -3.08639 | 9.90E-06 |          |
| 1161571 | A_23_P132760   | TRH                                                                        | Homo sapiens thyrotropin-releasing hormone (TRH), mRNA [NM_007117]                                            | -0.49005 | -3.09064 | 0.00002  |
| 2323335 | A_19_P00322448 | lincRNA:chr6:167317185-167318297 reverse strand                            | -0.49058                                                                                                      | -3.09444 | 0.0002   |          |
| 2314330 | A_19_P00330523 | lincRNA:chr8:133071643-133092468 reverse strand                            | -0.49405                                                                                                      | -3.11926 | 0.00013  |          |
| 1161094 | A_23_P325887   | TBC1D8B                                                                    | Homo sapiens TBC1 domain family, member 8B (with GRAM domain) (TBC1D8B), mRNA [NM_017752]                     | -0.49467 | -3.12369 | 0.00002  |
| 2336271 | A_33_P3357516  | SLC10A7                                                                    | Homo sapiens solute carrier family 10 (sodium/bile acid cotransporter) (SLC10A7), mRNA [NM_032128]            | -0.49563 | -3.13063 | 0.00061  |
| 1154628 | A_23_P387537   | PRRG3                                                                      | Homo sapiens proline rich Gla (G-carboxyglutamic acid) 3 (transmembrane) (PRRG3), mRNA [NM_024082]            | -0.4987  | -3.15281 | 0.004    |
| 2318529 | A_33_P3385516  | CBLN4                                                                      | Homo sapiens cerebellin 4 precursor (CBLN4), mRNA [NM_080617 NM_080617]                                       | -0.49995 | -3.16194 | 5.22E-06 |
| 2332950 | A_33_P3379046  | LOC729770                                                                  | PREDICTED: Homo sapiens hypothetical LOC729770 (LOC729770), mRNA [XR_112442]                                  | -0.50106 | -3.17    | 6.78E-11 |
| 2322541 | A_33_P3244224  | LOC100129048                                                               | Homo sapiens cDNA FLJ46195 seq, clone TEST14006539. [AK1280 AK128074]                                         | -0.50344 | -3.18744 | 0.00017  |
| 1151113 | A_32_P70203    | FAMC1                                                                      | Homo sapiens family with sequence similarity 41, member C (FAMC1), mRNA [NM_027055]                           | -0.50364 | -3.18886 | 0.00953  |
| 2329498 | A_33_P3273267  | LOC729863                                                                  | PREDICTED: Homo sapiens putative zinc finger protein ENSP0001 (XM_003120379)                                  | -0.50625 | -3.20811 | 1.93E-07 |
| 2330683 | A_19_P00329806 | lincRNA:chr12:54358095-54362515 reverse strand                             | -0.50667                                                                                                      | -3.2112  | 4.89E-11 |          |
| 1165888 | A_32_P315395   | MGC16275                                                                   | Homo sapiens hypothetical protein MGC16275 (MGC16275), non-coding RNA [NR_026914]                             | -0.50747 | -3.21712 | 0.00356  |
| 2333356 | A_33_P3268686  | FBXW12                                                                     | Homo sapiens F-box and WD repeat domain containing 12 (FBXW12), mRNA [NM_207102]                              | -0.50957 | -3.23276 | 0.00022  |
| 2322857 | A_19_P00802151 | lincRNA:chr3:156894106-156971481 reverse strand                            | -0.5098                                                                                                       | -3.23442 | 6.22E-08 |          |
| 1154119 | A_24_P102650   | MUC5B                                                                      | Homo sapiens mucin 5B, oligomeric mucus/gel-forming (MUC5B), mRNA [NM_002458]                                 | -0.5128  | -3.25685 | 0.00393  |
| 2328588 | A_33_P3250895  | PSMB11                                                                     | Homo sapiens proteasome (prosome, macropain) subunit, beta type 11 (PSMB11), mRNA [NM_001099780]              | -0.51906 | -3.30418 | 0.00344  |
| 2329619 | A_33_P3323989  | Unknown                                                                    |                                                                                                               | -0.52059 | -3.31582 | 0.0005   |
| 2317251 | A_33_P3771741  | Homo sapiens cDNA FLJ34909 fis, clone NT2R12009301, moderately conserved   | -0.52177                                                                                                      | -3.32481 | 0.0028   |          |
| 2322528 | A_19_P00319043 | lincRNA:chr8:52808516-52808934 forward strand                              | -0.52301                                                                                                      | -3.33434 | 0.00775  |          |
| 2333677 | A_33_P3221009  | Homo sapiens cDNA FLJ45966 fis, clone PLACE7015647. [AK127 AK127863]       | -0.52374                                                                                                      | -3.33994 | 1.48E-07 |          |
| 2335603 | A_19_P00806053 | lincRNA:chr8:6516692-6533242 reverse strand                                | -0.52923                                                                                                      | -3.38247 | 0.00754  |          |
| 2333636 | A_33_P3388067  | ZNF735                                                                     | Homo sapiens zinc finger protein 735 (ZNF735), mRNA [NM_00115159524]                                          | -0.52984 | -3.38564 | 1.08E-06 |
| 2325543 | A_33_P3387320  | RPL31                                                                      | full-length cDNA clone CS0D1015Y006 of Placenta Cot 25-normal (RPL31), mRNA [CR595074]                        | -0.53259 | -3.40869 | 0.00282  |
| 2330608 | A_33_P3231252  | NHLH2                                                                      | Homo sapiens nascent helix loop helix 2 (NHLH2), transcript variant 1, mRNA [NM_005599]                       | -0.53442 | -3.42313 | 1.26E-11 |
| 1146199 | A_32_P225659   | UTS2D                                                                      | Homo sapiens urotensin 2 domain containing (UTS2D), mRNA [NM_198152]                                          | -0.53724 | -3.44542 | 2.18E-06 |
| 869406  | A_23_P133408   | CSF2                                                                       | Homo sapiens colony stimulating factor 2 (granulocyte-macrophage) (CSF2), mRNA [NM_000758]                    | -0.5396  | -3.46419 | 0.00713  |
| 2332554 | A_19_P00324198 | lincRNA:chr2:74610317-74618792 forward strand                              | -0.54157                                                                                                      | -3.47995 | 0.00019  |          |
| 881873  | A_23_P319583   | RIMS3                                                                      | Homo sapiens regulating synaptic membrane exocytosis 3 (RIMS3), mRNA [NM_014747]                              | -0.54251 | -3.48747 | 0.00144  |
| 2313679 | A_19_P00321221 | lincRNA:chr5:25413547-25446034 reverse strand                              | -0.54542                                                                                                      | -3.51088 | 0.00812  |          |
| 882121  | A_23_P22761    | SHOX                                                                       | Homo sapiens short stature homeobox (SHOX), transcript variant 1, mRNA [NM_006883]                            | -0.54826 | -3.53388 | 1.18E-09 |
| 1145663 | A_23_P209700   | NMUR1                                                                      | Homo sapiens neuromedin U receptor 1 (NMUR1), mRNA [NM_008 NM_006056]                                         | -0.54919 | -3.54155 | 2.70E-09 |

Supplementary Table 1. Continued.

|         |                |              |                                                                                 |          |          |          |
|---------|----------------|--------------|---------------------------------------------------------------------------------|----------|----------|----------|
| 2327340 | A_33_P3281728  | LOC388692    | PREDICTED: Homo sapiens hypothetical LOC100133075 (LOC10C XR_039086             | -0.55051 | -3.55233 | 0.00961  |
| 2319854 | A_19_P00807924 |              | lincRNA:chr4:103337452-103350952 forward strand                                 | -0.55237 | -3.56755 | 0.00006  |
| 2335869 | A_33_P3403666  | NDOR1        | Homo sapiens NADPH dependent diflavin oxidoreductase 1 (NDOF NM_001144026       | -0.55822 | -3.61591 | 0.00006  |
| 2320991 | A_19_P00807986 |              | lincRNA:chr9:123606154-123611279 reverse strand                                 | -0.55843 | -3.61767 | 0.0053   |
| 2327178 | A_19_P00809587 |              | lincRNA:chr8:96297524-96413824 reverse strand                                   | -0.56038 | -3.63392 | 5.74E-08 |
| 2335229 | A_33_P3411384  |              | Unknown                                                                         | -0.56193 | -3.64698 | 2.58E-12 |
| 2325276 | A_19_P00325176 |              | lincRNA:chr2:43102921-43110596 reverse strand                                   | -0.5637  | -3.66189 | 3.62E-12 |
| 2325528 | A_33_P3382281  |              | Unknown                                                                         | -0.56478 | -3.67093 | 0.00385  |
| 2331355 | A_33_P3216694  | HIVEP3       | Homo sapiens human immunodeficiency virus type I enhancer binc NM_024503        | -0.56903 | -3.70704 | 0.0027   |
| 1152611 | A_23_P165239   | ZNF208       | Homo sapiens zinc finger protein 208 (ZNF208), mRNA [NM_00715 NM_007153         | -0.57273 | -3.73878 | 3.36E-11 |
| 2323294 | A_33_P3420704  |              | Unknown                                                                         | -0.58178 | -3.81752 | 0.00071  |
| 2320939 | A_19_P00322282 |              | lincRNA:chr3:185003349-185009534 reverse strand                                 | -0.58273 | -3.82586 | 0.00697  |
| 2319257 | A_19_P00331179 |              | lincRNA:chr15:42773808-42780958 forward strand                                  | -0.5837  | -3.83445 | 0.00512  |
| 2325170 | A_33_P3278220  |              | Rab9 effector protein with kelch motifs [Source:HGNC Symbol;Acc: AL832249       | -0.58573 | -3.85241 | 7.68E-13 |
| 1148030 | A_23_P349398   | ZAR1         | Homo sapiens zygote arrest 1 (ZAR1), mRNA [NM_175619] NM_175619                 | -0.58606 | -3.85535 | 0.00857  |
| 2322787 | A_33_P3213311  |              | Unknown                                                                         | -0.58715 | -3.86498 | 3.51E-12 |
| 2320949 | A_33_P3230558  | OR2T12       | Homo sapiens olfactory receptor, family 2, subfamily T, member 1; NM_001004692  | -0.58788 | -3.87152 | 0.00107  |
| 2335604 | A_33_P3230558  | EML5         | Homo sapiens echinoderm microtubule associated protein like 5 (E NM_183387      | -0.58843 | -3.87639 | 8.77E-08 |
| 1142166 | A_32_P206735   |              | Unknown                                                                         | -0.59521 | -3.93739 | 0.0013   |
| 2334404 | A_33_P3372094  | LLGL1        | Homo sapiens lethal giant larvae homolog 1 (Drosophila) (LLGL1), NM_004140      | -0.59566 | -3.94152 | 0.0066   |
| 1162289 | A_23_P791068   | ATP8B3       | Homo sapiens ATPase, aminophospholipid transporter, class I, typ NM_138813      | -0.59704 | -3.95407 | 0.0009   |
| 2328169 | A_19_P00804666 |              | lincRNA:chr19:57769688-57777413 reverse strand                                  | -0.60622 | -4.03854 | 2.81E-13 |
| 2333954 | A_33_P3226761  | SOX18        | Homo sapiens SRY (sex determining region Y)-box 18 (SOX18), m NM_018419         | -0.6081  | -4.05604 | 6.74E-21 |
| 2322919 | A_19_P00805860 |              | lincRNA:chr1:9229531-9229931 reverse strand                                     | -0.61013 | -4.07504 | 6.71E-13 |
| 1159657 | A_24_P628932   | LOC100510579 | PREDICTED: Homo sapiens hypothetical protein LOC100510579 ( XM_003120527        | -0.61293 | -4.10141 | 0.0029   |
| 2320579 | A_33_P3235721  | G11orf87     | Homo sapiens chromosome 11 open reading frame 87 (G11orf87), NM_207645          | -0.62185 | -4.18653 | 0.00164  |
| 2331566 | A_33_P3570974  |              | Homo sapiens chromosome 8 open reading frame 50, mRNA (cDN, BC043205            | -0.62369 | -4.20423 | 1.00E-06 |
| 1157213 | A_23_P402331   | WFDC5        | Homo sapiens WAP four-disulfide core domain 5 (WFDC5), mRNA NM_145652           | -0.62622 | -4.22881 | 0.00004  |
| 2329264 | A_19_P00316615 |              | lincRNA:chr1:234794725-234795953 reverse strand                                 | -0.63139 | -4.27948 | 0.00128  |
| 2321677 | A_33_P3319276  | FAM178B      | Homo sapiens family with sequence similarity 178, member B (FAM NM_001122646    | -0.63217 | -4.28718 | 0.00221  |
| 2323682 | A_33_P3484806  | FLJ21408     | Homo sapiens cDNA: FLJ21408 fis, clone COL03917, [AK025061] AK025061            | -0.63232 | -4.28864 | 3.13E-06 |
| 2330028 | A_33_P3285799  |              | adenylate kinase domain containing 1 [Source:HGNC Symbol;Acc: AK131244          | -0.63272 | -4.29257 | 0.00831  |
| 2329247 | A_33_P3345126  | ZNF568       | Homo sapiens zinc finger protein 568 (ZNF568), mRNA [NM_19853 NM_198539         | -0.63524 | -4.31753 | 0.00954  |
| 2331609 | A_19_P00326827 |              | lincRNA:chr15:75201097-75208047 forward strand                                  | -0.64889 | -4.45548 | 4.06E-14 |
| 2316268 | A_19_P00322295 |              | lincRNA:chr8:90737074-90737855 forward strand                                   | -0.64959 | -4.46259 | 9.69E-12 |
| 2331703 | A_19_P00809021 |              | lincRNA:chr5:127385751-127405576 forward strand                                 | -0.66278 | -4.6002  | 0.00726  |
| 1138723 | A_24_P211842   | FADS6        | Homo sapiens fatty acid desaturase domain family, member 6 (FAL NM_178128       | -0.66304 | -4.60298 | 0.0018   |
| 2324909 | A_19_P00326849 |              | lincRNA:chr3:182651981-182660175 forward strand                                 | -0.66375 | -4.61055 | 0.00097  |
| 2327787 | A_33_P3357097  | LOC100132741 | Homo sapiens hypothetical LOC100132741 (LOC100132741), non- NR_034004           | -0.66506 | -4.62448 | 0.00018  |
| 886537  | A_24_P151      | KCNAB2       | Homo sapiens potassium voltage-gated channel, shaker-related s1 NM_003636       | -0.67317 | -4.71161 | 0.00009  |
| 2318600 | A_33_P3209130  | LOC100128496 | CR738909 Soares_testis_NHT Homo sapiens cDNA clone IMAGp9 <sup>9</sup> CR738909 | -0.67401 | -4.72075 | 0.00907  |
| 880854  | A_24_P156769   | MPL          | Homo sapiens myeloproliferative leukemia virus oncogene (MPL), l NM_005373      | -0.67443 | -4.72534 | 0.00065  |
| 2316633 | A_33_P3694746  |              | Homo sapiens cDNA FLJ32224 fis, clone PLACE6004336, [AK056 AK056786             | -0.68716 | -4.86583 | 0.00028  |
| 2332331 | A_19_P00318912 |              | lincRNA:chr2:8029554-8037881 forward strand                                     | -0.69311 | -4.93303 | 0.00104  |
| 2318513 | A_33_P3544856  | LOC100292680 | Homo sapiens cDNA FLJ33297 fis, clone BNGH42001406, [AK090 AK090616             | -0.69358 | -4.93837 | 0.00207  |
| 2322152 | A_19_P00801407 |              | lincRNA:chr5:169624950-169625424 reverse strand                                 | -0.69375 | -4.94024 | 0.00082  |
| 2322825 | A_33_P3394252  | C2orf67      | Homo sapiens chromosome 2 open reading frame 67 (C2orf67), ml NM_152519         | -0.69879 | -4.99793 | 0.00885  |
| 2335021 | A_19_P00809030 |              | lincRNA:chr2:156877046-157111432 reverse strand                                 | -0.69946 | -5.0057  | 0.00109  |
| 1149764 | A_23_P127663   | PRRG4        | Homo sapiens proline rich Gla (G-carboxyglutamic acid) 4 (transm NM_024081      | -0.70201 | -5.03509 | 0.00823  |
| 2316577 | A_33_P3297630  | LOC729966    | Homo sapiens hypothetical LOC729966 (LOC729966), non-coding NR_036575           | -0.708   | -5.10502 | 0.00794  |
| 2334561 | A_33_P3301097  |              | Unknown                                                                         | -0.71103 | -5.14085 | 7.37E-15 |
| 2324976 | A_19_P00808521 |              | lincRNA:chr1:247365199-247365322 forward strand                                 | -0.71235 | -5.15646 | 0.00802  |
| 2319510 | A_33_P3655646  | LOC100130354 | Homo sapiens hypothetical protein LOC100130354, mRNA (cDNA BC069735             | -0.71256 | -5.15895 | 0.00865  |
| 2314874 | A_33_P3408514  | SCNN1D       | Homo sapiens sodium channel, nonvoltage-gated 1, delta (SCNN1D NM_001130413     | -0.71703 | -5.21236 | 0.00004  |
| 2327353 | A_33_P3326667  |              | Unknown                                                                         | -0.71994 | -5.2474  | 0.00397  |
| 2332442 | A_33_P3212072  | GORAB        | Homo sapiens golgin, RAB6-interacting (GORAB), transcript variant NM_001146039  | -0.72089 | -5.2589  | 0.00577  |
| 2319706 | A_19_P00319435 |              | lincRNA:chr5:42985502-43010278 forward strand                                   | -0.72783 | -5.34355 | 0.00003  |
| 2325467 | A_33_P3355937  | LOC284276    | Homo sapiens hypothetical LOC284276 (LOC284276), non-coding NR_015417           | -0.73337 | -5.41215 | 0.00414  |
| 2318966 | A_33_P3358815  | DEFB103A     | Homo sapiens defensin, beta 103A (DEFB103A), mRNA [NM_00101 NM_001081551        | -0.73746 | -5.46339 | 0.00396  |
| 1158286 | A_23_P144746   | ZNF454       | Homo sapiens zinc finger protein 454 (ZNF454), transcript variant NM_182594     | -0.73768 | -5.46615 | 0.00402  |
| 2327859 | A_19_P00800915 |              | lincRNA:chr2:156244304-156300229 reverse strand                                 | -0.74204 | -5.52131 | 0.00336  |
| 2333532 | A_33_P3416644  |              | Unknown                                                                         | -0.74391 | -5.54506 | 0.00361  |
| 2327991 | A_19_P00806227 |              | lincRNA:chr5:151189307-151195107 reverse strand                                 | -0.75106 | -5.63717 | 0.0027   |
| 1168250 | A_24_P940086   | NXPH3        | Homo sapiens neurexophilin 3 (NXPH3), mRNA [NM_007225] NM_007225                | -0.75369 | -5.67145 | 0.00281  |
| 2319986 | A_33_P3413808  | PABPC1L      | Homo sapiens poly(A) binding protein, cytoplasmic 1-like (PABPC NM_001124756    | -0.77001 | -5.88861 | 0.00221  |
| 2325738 | A_33_P3414494  |              | Unknown                                                                         | -0.7768  | -5.98134 | 2.15E-06 |
| 2324715 | A_33_P3402211  | LOC100506220 | PREDICTED: Homo sapiens hypothetical LOC100506220 (LOC10C XR_110895             | -0.77875 | -6.00823 | 0.00142  |
| 2320789 | A_19_P00318614 |              | lincRNA:chr3:63110000-63110663 forward strand                                   | -0.78144 | -6.04561 | 0.00173  |
| 2324039 | A_19_P00805400 |              | lincRNA:chr1:211564402-211589752 reverse strand                                 | -0.78789 | -6.136   | 1.91E-08 |
| 1144183 | A_23_P131588   | BMP10        | Homo sapiens bone morphogenetic protein 10 (BMP10), mRNA [N NM_014482           | -0.78819 | -6.14027 | 3.30E-06 |
| 2335486 | A_33_P3280521  | MFAP3L       | Homo sapiens microfibrillar-associated protein 3-like (MFAP3L), t NM_021647     | -0.80384 | -6.36556 | 0.00076  |
| 2334108 | A_19_P00812045 |              | lincRNA:chr4:129215150-129232550 forward strand                                 | -0.81184 | -6.48401 | 0.00061  |

Supplementary Table 1. Continued.

|         |                |              |                                                                               |          |           |          |
|---------|----------------|--------------|-------------------------------------------------------------------------------|----------|-----------|----------|
| 2327609 | A_33_P3408137  | LOG100130248 | Homo sapiens cDNA FLJ42222 fis, clone THYMU2039411. [AK124 AK124216           | -0.81343 | -6.50775  | 0.0005   |
| 881671  | A_23_P325606   | ESX1         | Homo sapiens ESX homeobox 1 (ESX1), mRNA [NM_153448] NM_153448                | -0.82135 | -6.62752  | 1.41E-13 |
| 2326429 | A_19_P00328380 |              | lincRNA:chr3:175987356-176039381 reverse strand                               | -0.82722 | -6.71762  | 4.67E-17 |
| 2326639 | A_19_P00325058 |              | lincRNA:chr14:101389472-101539847 reverse strand                              | -0.83251 | -6.80009  | 0.00034  |
| 2327579 | A_33_P3320212  |              | Unknown                                                                       | -0.84105 | -6.93511  | 0.00021  |
| 2320045 | A_33_P3379081  |              | 601191189F1 NIH_MGC_7 Homo sapiens cDNA clone IMAGE:35351 BE265920            | -0.8414  | -6.94072  | 0.00022  |
| 869436  | A_23_P106194   | FOS          | Homo sapiens FBJ murine osteosarcoma viral oncogene homolog NM_005252         | -0.84277 | -6.96253  | 2.36E-32 |
| 2324247 | A_33_P3264524  |              | Unknown                                                                       | -0.85296 | -7.12795  | 9.90E-09 |
| 1152443 | A_24_P15877    |              | Homo sapiens FKSG41 (FKSG41) mRNA, complete cds. [AF33376 AF333762            | -0.86157 | -7.27055  | 0.00014  |
| 1158569 | A_23_P152330   | DOC2A        | Homo sapiens double C2-like domains, alpha (DOC2A), mRNA [NM_003586           | -0.86457 | -7.321    | 1.10E-07 |
| 1167892 | A_23_P136571   | C1orf14      | Homo sapiens chromosome 1 open reading frame 14 (C1orf14), ml NM_030933       | -0.86562 | -7.33885  | 0.00011  |
| 2314250 | A_33_P3389168  |              | Unknown                                                                       | -0.92293 | -8.37387  | 0.00001  |
| 878987  | A_23_P84661    | ARHGAP9      | Homo sapiens Rho GTPase activating protein 9 (ARHGAP9), trans NM_032496       | -0.92986 | -8.50869  | 8.11E-09 |
| 1155346 | A_24_P59236    | RESP18       | Homo sapiens regulated endocrine-specific protein 18 homolog (rs NM_001007089 | -0.9385  | -8.67957  | 2.10E-06 |
| 2333913 | A_33_P3400302  | TTYT18       | Homo sapiens testis-specific transcript, Y-linked 18 (non-protein NR_001550   | -0.94197 | -8.74916  | 0.0016   |
| 2322698 | A_33_P3311994  | KIAA1239     | Homo sapiens KIAA1239 (KIAA1239), mRNA [NM_001144990] NM_001144990            | -0.94575 | -8.82563  | 4.13E-06 |
| 2334705 | A_33_P3230439  | LOC100130148 | Homo sapiens hypothetical LOC100130148 (LOC100130148), non- NR_024560         | -0.96351 | -9.19422  | 1.07E-06 |
| 2334680 | A_19_P00806038 |              | lincRNA:chr8:125471969-125486269 reverse strand                               | -1.01827 | -10.42959 | 2.45E-19 |
| 2313467 | A_33_P3280346  | LOC100130857 | Homo sapiens cDNA FLJ39731 fis, clone SMINT2015745. [AK097( AK097050          | -1.05551 | -11.36357 | 2.45E-08 |
| 1142788 | A_32_P135517   | LOC100506105 | PREDICTED: Homo sapiens hypothetical LOC100506105 (LOC100 XR_109318           | -1.0714  | -11.78697 | 1.21E-15 |
| 2334587 | A_33_P3350744  |              | Unknown                                                                       | -1.13207 | -13.55419 | 3.10E-12 |
| 2330300 | A_33_P3809497  | FLJ37505     | Homo sapiens hypothetical LOC400087 (FLJ37505), non-coding F NR_033987        | -1.17876 | -15.0925  | 7.23E-19 |
| 2314863 | A_33_P3337569  | C4orf40      | Homo sapiens chromosome 4 open reading frame 40 (C4orf40), ml NM_214711       | -1.18137 | -15.18356 | 1.74E-11 |
| 2326840 | A_19_P00801412 |              | lincRNA:chr21:10701104-10873604 forward strand                                | -1.19385 | -15.62617 | 5.73E-12 |
| 2334781 | A_33_P3358277  |              | potassium channel, subfamily K, member 1 [Source:HGNC Symbol: AK090902        | -1.21173 | -16.28278 | 2.36E-12 |
| 2327788 | A_33_P3300747  | ADHFE1       | Homo sapiens alcohol dehydrogenase, iron containing, 1 (ADHFE1), NM_144650    | -1.28046 | -19.07485 | 3.76E-19 |
| 2316576 | A_19_P00806426 |              | lincRNA:chr14:64116297-64131817 forward strand                                | -1.2808  | -19.08983 | 5.06E-14 |
| 2333644 | A_33_P3283974  |              | PREDICTED: Homo sapiens hypothetical LOC399829 (LOC39982E XR_109033           | -1.37034 | -23.46043 | 3.37E-16 |
| 2334403 | A_33_P3322348  | LOC100128942 | cDNA FLJ46600 fis, clone THYMUJ3047144 [Source:UniProtKB/T AK128457           | -1.5982  | -39.64566 | 5.24E-20 |
| 2334194 | A_19_P00802785 |              | lincRNA:chr3:72644685-72734460 reverse strand                                 | -1.64633 | -44.2923  | 1.48E-20 |
| 2334273 | A_33_P3601802  |              | AGENCOURT_13978263 NIH_MGC_172 Homo sapiens cDNA 5', mf CD049182              | -1.71019 | -51.30877 | 3.73E-21 |
| 1150505 | A_23_P155539   | POU1F1       | Homo sapiens POU class 1 homeobox 1 (POU1F1), transcript vari NM_000306       | -1.85572 | -71.73266 | 8.83E-23 |
| 2334402 | A_19_P00805097 |              | lincRNA:chr5:88390860-88394207 forward strand                                 | -1.86434 | -73.17128 | 3.73E-22 |
| 1140924 | A_23_P259003   | PEX5L        | Homo sapiens peroxisomal biogenesis factor 5-like (PEX5L), mRN. NM_016559     | -2       | -100      | 2.22E-23 |
| 1153025 | A_32_P26401    | C21orf54     | Homo sapiens chromosome 21 open reading frame 54 (C21orf54), NR_024102        | -2       | -100      | 1.12E-22 |

Supplementary Table 2. Changes in gene expression of no infection with respect to TW295.

| Sequence ID | Sequence Code  | Primary Sequence | Sequence Description                                                                        | Accession #  | Log(Ratio) | Fold Change | P-value  |
|-------------|----------------|------------------|---------------------------------------------------------------------------------------------|--------------|------------|-------------|----------|
| 2314508     | A_19_P00806374 |                  | lincRNA:chr11:123940940-123956165 reverse strand                                            |              | 1.88621    | 76.95079    | 2.69E-22 |
| 2328902     | A_33_P3492042  |                  | Homo sapiens D21S2091E mRNA sequence                                                        | AY063455     | 1.73744    | 54.63136    | 1.83E-21 |
| 1161927     | A_32_P12202    | FAM9C            | family with sequence similarity 9, member 1                                                 | BX648919     | 1.67738    | 47.57545    | 1.20E-18 |
| 882839      | A_23_P503059   | CNTN5            | Homo sapiens contactin 5 (CNTN5), transmembrane protein                                     | NM_014361    | 1.27888    | 19.0056     | 2.29E-14 |
| 2329077     | A_33_P3417840  | C16orf47         | Homo sapiens cDNA FLJ26184 fis, clone AAK129695                                             |              | 1.23972    | 17.36683    | 5.07E-09 |
| 2313252     | A_19_P00807378 |                  | lincRNA:chr8:102201249-102207349 forward strand                                             |              | 1.1023     | 12.65601    | 6.38E-19 |
| 1162083     | A_32_P88240    | KBTBD12          | Homo sapiens kelch repeat and BTB (POZ) domain containing 12                                | NM_207335    | 1.09276    | 12.3812     | 1.46E-11 |
| 2313939     | A_33_P3374971  | TRIM53           | Homo sapiens tripartite motif-containing 5                                                  | NR_028346    | 1.03313    | 10.79269    | 2.85E-08 |
| 2314004     | A_33_P3255051  | LOC100509927     | PREDICTED: Homo sapiens histone H2A tyrosine phosphorylation variant                        | XM_003119551 | 1.01002    | 10.23342    | 9.57E-08 |
| 2333629     | A_19_P00327304 |                  | lincRNA:chr15:49013058-49023258 forward strand                                              |              | 0.93141    | 8.53902     | 1.52E-06 |
| 2313107     | A_33_P3044633  |                  | Homo sapiens mRNA; cDNA DKFZp686i04 BX648590                                                |              | 0.92824    | 8.47697     | 5.08E-06 |
| 2317313     | A_19_P00801752 |                  | lincRNA:chr21:44751672-44819297 reverse strand                                              |              | 0.90495    | 8.03435     | 0.00001  |
| 879364      | A_23_P155057   | CYTH4            | Homo sapiens cytohesin 4 (CYTH4), mRNA                                                      | NM_013385    | 0.88451    | 7.66504     | 0.00003  |
| 2329571     | A_33_P3352887  | LOC388692        | Homo sapiens hypothetical LOC388692 (LOC10027002)                                           |              | 0.83947    | 6.90989     | 0.00014  |
| 2325759     | A_33_P3310588  |                  | Unknown                                                                                     |              | 0.83064    | 6.77072     | 0.00008  |
| 887362      | A_24_P205994   | EPGN             | Homo sapiens epithelial mitogen homolog (epithelial growth factor receptor tyrosine kinase) | NM_001013442 | 0.82579    | 6.69555     | 0.00022  |
| 2322494     | A_19_P00318045 |                  | lincRNA:chr2:20069253-20072338 reverse strand                                               |              | 0.80532    | 6.38738     | 0.00039  |
| 2320265     | A_33_P3283535  |                  | Unknown                                                                                     |              | 0.78895    | 6.15105     | 0.00089  |
| 2331081     | A_19_P00322249 |                  | lincRNA:chr2:47558964-47559494 forward strand                                               |              | 0.78712    | 6.12516     | 1.26E-10 |
| 2314565     | A_19_P00323009 |                  | lincRNA:chr13:114598075-114624290 forward strand                                            |              | 0.78092    | 6.03842     | 0.00089  |
| 1137521     | A_24_P550924   | BTBD19           | Homo sapiens BTB (POZ) domain containing 19                                                 | NM_001136537 | 0.77171    | 5.91168     | 0.00121  |
| 2331548     | A_19_P00810108 |                  | lincRNA:chrX:38716431-38792681 reverse strand                                               |              | 0.76067    | 5.76323     | 0.00029  |
| 2332022     | A_33_P3314073  |                  | Unknown                                                                                     |              | 0.75978    | 5.75154     | 0.00165  |
| 2314005     | A_33_P3411165  | MAGEA2B          | Homo sapiens melanoma antigen family A, member 2B                                           | NM_153488    | 0.74781    | 5.59509     | 0.00234  |
| 1158762     | A_24_P214858   | TREML2           | Homo sapiens triggering receptor expressed on myeloid cells 2                               | NM_024807    | 0.73936    | 5.48729     | 0.00289  |
| 2322838     | A_33_P3244249  |                  | SH3 domain and tetratricopeptide repeats domain containing 1                                | AK127248     | 0.73281    | 5.40516     | 0.00331  |
| 2320008     | A_33_P3420500  | ZDHHC20          | Homo sapiens zinc finger, DHHC-type containing 20                                           | BC034944     | 0.73194    | 5.39436     | 0.00308  |
| 2325731     | A_33_P3277688  | LOC100132344     | Homo sapiens cDNA FLJ43495 fis, clone PAK125484                                             |              | 0.73123    | 5.38551     | 9.02E-14 |
| 1160709     | A_23_P90980    | NEU2             | Homo sapiens sialidase 2 (cytosolic sialidase)                                              | NM_005383    | 0.72957    | 5.36502     | 0.00004  |
| 2317613     | A_19_P00811555 |                  | lincRNA:chr14:96505728-96560235 reverse strand                                              |              | 0.72933    | 5.36206     | 0.00171  |
| 1142822     | A_24_P6449     | SAMD7            | Homo sapiens sterile alpha motif domain containing 7                                        | NM_182610    | 0.72864    | 5.35349     | 0.0036   |
| 2319999     | A_33_P3396562  | LOC642414        | PREDICTED: Homo sapiens putative tripartite repeat domain containing 1                      | XM_003119181 | 0.72714    | 5.33505     | 7.74E-12 |
| 1138717     | A_24_P15898    |                  | Uncharacterized protein C1orf145 [Source:Ensembl]                                           | BC027909     | 0.72383    | 5.29454     | 0.00373  |
| 2322483     | A_19_P00327099 |                  | lincRNA:chr8:138387843-138421643 reverse strand                                             |              | 0.71839    | 5.22871     | 0.00435  |
| 2330307     | A_33_P3384492  | LOC100127946     | PREDICTED: Homo sapiens hypothetical protein                                                | XM_001717040 | 0.70844    | 5.11017     | 0.00265  |
| 2313950     | A_33_P3279276  | GRIP2            | Homo sapiens glutamate receptor interacting protein 2                                       | NM_001080423 | 0.70789    | 5.10382     | 0.00559  |
| 2331563     | A_33_P3284611  |                  | Unknown                                                                                     |              | 0.70451    | 5.06423     | 0.00576  |
| 2330387     | A_19_P00320251 |                  | lincRNA:chr4:79567153-79602239 forward strand                                               |              | 0.69449    | 4.94867     | 0.00818  |
| 2319844     | A_33_P3231858  | LOC100133991     | Homo sapiens similar to hCG1995169 (LOC10024435)                                            |              | 0.68964    | 4.89369     | 0.00485  |
| 1146028     | A_23_P341527   | DCST1            | Homo sapiens DC-STAMP domain containing 1                                                   | NM_152494    | 0.68693    | 4.86331     | 0.00265  |
| 2314563     | A_33_P3224181  |                  | DA918960 SMIINT2 Homo sapiens cDNA cl DA918960                                              |              | 0.68652    | 4.85871     | 0.00013  |
| 2327901     | A_19_P00800621 |                  | lincRNA:chr21:29918229-30215104 reverse strand                                              |              | 0.68482    | 4.83967     | 0.00952  |
| 2318719     | A_33_P3410274  |                  | Unknown                                                                                     |              | 0.68478    | 4.83929     | 0.00874  |
| 2334309     | A_33_P3258772  | LOC100506816     | PREDICTED: Homo sapiens hypothetical protein                                                | LR_108400    | 0.68433    | 4.83431     | 3.30E-07 |
| 1158774     | A_32_P154223   | LOC100505683     | PREDICTED: Homo sapiens hypothetical protein                                                | LR_109654    | 0.68292    | 4.81855     | 0.00947  |
| 2314589     | A_19_P00321664 |                  | lincRNA:chr4:6672454-6675524 forward strand                                                 |              | 0.68289    | 4.81828     | 0.00024  |
| 2317444     | A_33_P3354574  |                  | Unknown                                                                                     |              | 0.67313    | 4.71121     | 0.00007  |
| 2312990     | A_33_P3246774  | LOC649201        | PREDICTED: Homo sapiens paraneoplastic protein                                              | XM_001127211 | 0.67091    | 4.68714     | 0.00627  |
| 2312477     | A_33_P3295029  | KBTBD12          | Homo sapiens kelch repeat and BTB (POZ) domain containing 12                                | NM_207335    | 0.66604    | 4.63495     | 0.00099  |
| 2313938     | A_33_P3236628  |                  | branched chain keto acid dehydrogenase E1                                                   | AL833143     | 0.65987    | 4.56957     | 0.0011   |
| 1155912     | A_23_P114210   | POU3F4           | Homo sapiens POU class 3 homeobox 4 (POU3F4)                                                | NM_000307    | 0.65701    | 4.53953     | 0.00062  |
| 1159480     | A_24_P56330    | C13orf16         | Homo sapiens chromosome 13 open reading frame 16                                            | NM_152324    | 0.65596    | 4.52859     | 0.00165  |
| 1157226     | A_23_P421811   | C20orf132        | Homo sapiens chromosome 20 open reading frame 132                                           | NM_152503    | 0.65342    | 4.5022      | 0.00065  |
| 1143909     | A_23_P55632    | SERPINB3         | Homo sapiens serpin peptidase inhibitor, clade B, member 3                                  | NM_006919    | 0.64229    | 4.3882      | 0.00007  |
| 1167454     | A_23_P143512   | HSF2BP           | Homo sapiens heat shock transcription factor 2 binding protein                              | NM_007031    | 0.63119    | 4.27747     | 0.00544  |
| 1142763     | A_23_P2317     | DDN              | Homo sapiens dendrin (DDN), mRNA                                                            | NM_015086    | 0.61958    | 4.16467     | 9.35E-07 |
| 2322364     | A_33_P3353630  |                  | Unknown                                                                                     |              | 0.6071     | 4.04673     | 3.68E-07 |
| 2316961     | A_33_P3224190  | SLC29A4          | Homo sapiens solute carrier family 29 (nucleoside transporter)                              | NM_001040661 | 0.60657    | 4.04178     | 0.00132  |
| 2314124     | A_19_P00315627 |                  | lincRNA:chr9:2493073-2521995 reverse strand                                                 |              | 0.60254    | 4.00446     | 2.77E-08 |
| 885025      | A_23_P421379   | IGF2             | Homo sapiens insulin-like growth factor 2 (IGF2)                                            | NM_000612    | 0.60111    | 3.9913      | 3.14E-10 |
| 2314046     | A_33_P3244433  | FAM188B          | Homo sapiens cDNA FLJ33507 fis, clone BAK090826                                             |              | 0.5865     | 3.85926     | 0.00213  |

Supplementary Table 2. Continued.

|         |                |              |                                                           |         |         |          |
|---------|----------------|--------------|-----------------------------------------------------------|---------|---------|----------|
| 2331256 | A_19_P00807573 |              | lincRNA:chr11:64259424-64274774 reverse strand            | 0.58551 | 3.85041 | 0.00599  |
| 1155450 | A_23_P399797   | SMAD5OS      | Homo sapiens SMAD family member 5 opp:NR_026763           | 0.57417 | 3.75121 | 0.00026  |
| 883443  | A_23_P74928    | MR1          | Homo sapiens major histocompatibility com:NM_001531       | 0.55375 | 3.57891 | 0.001    |
| 2316221 | A_19_P00328916 |              | lincRNA:chr12:32555233-32563808 reverse strand            | 0.55289 | 3.57179 | 0.00573  |
| 2327311 | A_33_P3241184  |              | Unknown                                                   | 0.54875 | 3.53793 | 1.43E-11 |
| 2314232 | A_33_P3366824  |              | trafficking protein particle complex 2 pseud:AK310542     | 0.54839 | 3.53502 | 0.00089  |
| 2334855 | A_33_P3418838  |              | PREDICTED: Homo sapiens hypothetical protein XM_001716008 | 0.54106 | 3.4758  | 0.00069  |
| 2318173 | A_33_P3334205  | TMEM184A     | Homo sapiens transmembrane protein 184:NM_001097620       | 0.53748 | 3.44732 | 0.00861  |
| 2335884 | A_33_P3285877  |              | Unknown                                                   | 0.53557 | 3.43219 | 0.004    |
| 2325148 | A_19_P00802270 |              | lincRNA:chr2:121828880-121902705 forward strand           | 0.51937 | 3.30652 | 0.0069   |
| 886458  | A_23_P300100   | PLA2G2D      | Homo sapiens phospholipase A2, group IID:NM_012400        | 0.5179  | 3.29536 | 0.00138  |
| 2320762 | A_19_P00324706 |              | lincRNA:chr11:72446627-72462602 forward strand            | 0.5153  | 3.27566 | 0.00121  |
| 2318395 | A_33_P3382849  | ACR          | Homo sapiens acrosin (ACR), mRNA:NM_001097                | 0.51073 | 3.24139 | 3.29E-07 |
| 1146757 | A_23_P170574   | SNAI3        | Homo sapiens snail homolog 3 (Drosophila):NM_178310       | 0.50549 | 3.20253 | 0.00944  |
| 2324523 | A_19_P00801392 |              | lincRNA:chr5:93988844-94003469 forward strand             | 0.50358 | 3.18846 | 0.00258  |
| 2332901 | A_19_P00317818 |              | lincRNA:chr9:102564752-102567347 reverse strand           | 0.50088 | 3.16866 | 0.00838  |
| 2315445 | A_33_P3276112  |              | Homo sapiens cDNA FLJ44789 fis, clone BAK126743           | 0.49152 | 3.10112 | 0.00021  |
| 1152070 | A_23_P97096    | OPTC         | Homo sapiens opticin (OPTC), mRNA:NM_014359               | 0.48939 | 3.08594 | 1.21E-08 |
| 2312785 | A_33_P3314559  | RAB3C        | Homo sapiens RAB3C, member RAS oncog:NM_138453            | 0.48797 | 3.0759  | 5.84E-06 |
| 2323865 | A_19_P00802508 |              | lincRNA:chr2:12453499-12466124 forward strand             | 0.48247 | 3.03721 | 0.00042  |
| 1165450 | A_23_P151975   | RHCG         | Homo sapiens Rh family, C glycoprotein (R):NM_016321      | 0.47328 | 2.97358 | 0.00037  |
| 2318111 | A_19_P00801580 |              | lincRNA:chr22:25588075-25594350 reverse strand            | 0.47237 | 2.96737 | 1.04E-06 |
| 2317956 | A_33_P3267198  |              | cDNA FLJ43696 fis, clone TBAES2007964 XR_110423           | 0.47106 | 2.95841 | 0.00853  |
| 2318218 | A_19_P00811414 |              | lincRNA:chr1:84108887-84316837 forward strand             | 0.46861 | 2.94181 | 0.00076  |
| 2323910 | A_19_P00805265 |              | lincRNA:chr6:29701971-29740296 forward strand             | 0.4615  | 2.89403 | 0.00002  |
| 1137800 | A_23_P20578    | FAM166B      | Homo sapiens family with sequence similar:NM_001164310    | 0.45625 | 2.85926 | 0.0012   |
| 2330888 | A_33_P3232066  |              | Unknown                                                   | 0.45584 | 2.85651 | 2.66E-08 |
| 1164435 | A_23_P24311    | ALDH3B2      | Homo sapiens aldehyde dehydrogenase 3 f:NM_000695         | 0.45438 | 2.84693 | 0.00075  |
| 2322491 | A_33_P3390236  | LOC338963    | Homo sapiens epididymal protein pseudogene:NR_034139      | 0.454   | 2.84445 | 0.00971  |
| 2313311 | A_33_P3226557  | PRR23B       | Homo sapiens proline rich 23B (PRR23B), mRNA:NM_001013650 | 0.45102 | 2.82503 | 0.00612  |
| 880992  | A_23_P69497    | CLEC3B       | Homo sapiens C-type lectin domain family:NM_003278        | 0.45085 | 2.82392 | 0.00024  |
| 2313054 | A_19_P00807342 |              | lincRNA:chr1:55833137-55834447 forward strand             | 0.43458 | 2.72005 | 0.00433  |
| 2317358 | A_19_P00813235 |              | lincRNA:chr2:75201792-75213492 reverse strand             | 0.43176 | 2.70247 | 0.0027   |
| 2332068 | A_19_P00809429 |              | lincRNA:chr19:37454235-37517910 reverse strand            | 0.4297  | 2.68969 | 0.00556  |
| 2321441 | A_19_P00317854 |              | lincRNA:chr19:56784137-56813412 forward strand            | 0.42942 | 2.68794 | 0.00042  |
| 1158076 | A_24_P395814   | CGB          | Homo sapiens chorionic gonadotropin, beta:NM_000737       | 0.42675 | 2.67145 | 0.00084  |
| 2317276 | A_33_P3216200  |              | Unknown                                                   | 0.41982 | 2.62918 | 0.00507  |
| 2321338 | A_19_P00325628 |              | lincRNA:chr14:23764510-23770183 forward strand            | 0.41832 | 2.62011 | 0.00316  |
| 2323946 | A_19_P00316437 |              | lincRNA:chr4:15686304-15690595 forward strand             | 0.41812 | 2.61888 | 0.00524  |
| 2329623 | A_33_P3255531  | LOC100129216 | Putative uncharacterized protein ENSP000:XM_001721605     | 0.41554 | 2.60341 | 0.00106  |
| 1155891 | A_23_P100660   | SERPINF1     | Homo sapiens serpin peptidase inhibitor, cl:NM_002615     | 0.41494 | 2.59983 | 0.00123  |
| 2326983 | A_33_P3271470  | GREB1L       | Homo sapiens growth regulation by estrogen:NM_001142966   | 0.41355 | 2.59147 | 0.00154  |
| 2322406 | A_19_P00811931 |              | lincRNA:chr5:88215119-88544444 forward strand             | 0.41302 | 2.58833 | 0.00573  |
| 2329768 | A_19_P00318328 |              | lincRNA:chr16:11466321-11477551 forward strand            | 0.408   | 2.55857 | 0.00112  |
| 2314569 | A_33_P3315819  | LOC728208    | PREDICTED: Homo sapiens hypothetical protein L:XR_108453  | 0.40605 | 2.54715 | 0.00052  |
| 2318919 | A_33_P3424367  | TRIM14       | Homo sapiens tripartite motif-containing 14:NM_033219     | 0.39892 | 2.50566 | 0.00153  |
| 2329085 | A_19_P00330004 |              | lincRNA:chr12:28168533-28183008 reverse strand            | 0.39822 | 2.5016  | 0.0073   |
| 1154635 | A_23_P50276    | ANGPTL6      | Homo sapiens angiopoietin-like 6 (ANGPTL6):NM_031917      | 0.39708 | 2.49507 | 0.00083  |
| 2334687 | A_33_P3262167  |              | Unknown                                                   | 0.39477 | 2.4818  | 0.00617  |
| 2322332 | A_19_P00322412 |              | lincRNA:chr6:6794382-6801404 reverse strand               | 0.39447 | 2.48012 | 0.00317  |
| 2328638 | A_33_P3281010  |              | Homo sapiens cDNA FLJ43862 fis, clone T AK125850          | 0.39289 | 2.47108 | 0.00001  |
| 2320515 | A_19_P00323268 |              | lincRNA:chr6:48044816-48070216 forward strand             | 0.39212 | 2.46671 | 0.00566  |
| 2316950 | A_19_P00331084 |              | lincRNA:chr2:203179805-203194480 forward strand           | 0.39014 | 2.45551 | 0.00187  |
| 2329312 | A_33_P3224362  | PCBP3        | Homo sapiens poly(rC) binding protein 3 (P):NM_020528     | 0.38934 | 2.45098 | 0.00662  |
| 2317335 | A_33_P3234540  |              | Unknown                                                   | 0.38927 | 2.45058 | 4.24E-08 |
| 1146452 | A_23_P122134   | NMUR2        | Homo sapiens neuromedin U receptor 2 (N):NM_020167        | 0.38619 | 2.43326 | 0.00055  |
| 2331899 | A_19_P00329800 |              | lincRNA:chr1:204525202-204541352 forward strand           | 0.38559 | 2.42989 | 5.41E-08 |
| 2329972 | A_19_P00805336 |              | lincRNA:chr15:56580983-56592133 forward strand            | 0.38387 | 2.42033 | 0.00002  |
| 1150116 | A_23_P303101   | PCDHGC4      | Homo sapiens protocadherin gamma subfamily:NM_032406      | 0.38328 | 2.41705 | 0.0003   |
| 2322385 | A_19_P00800632 |              | lincRNA:chr2:152619954-152626029 reverse strand           | 0.38306 | 2.41581 | 8.31E-07 |
| 2315276 | A_33_P3265866  |              | Unknown                                                   | 0.38201 | 2.40996 | 1.42E-06 |
| 2319580 | A_19_P00326743 |              | lincRNA:chr2:32237771-32245946 forward strand             | 0.3771  | 2.38287 | 0.00373  |
| 2325776 | A_19_P00316039 |              | lincRNA:chr3:106531384-106556814 reverse strand           | 0.37642 | 2.37913 | 1.73E-07 |
| 887395  | A_23_P1452     | NPFRR1       | Homo sapiens neuropeptide FF receptor 1:NM_022146         | 0.37249 | 2.35771 | 0.00493  |

Supplementary Table 2. Continued.

|         |                |              |                                                         |          |          |          |
|---------|----------------|--------------|---------------------------------------------------------|----------|----------|----------|
| 2322405 | A_19_P00322979 |              | lincRNA:chr20:37049674-37050891 forward strand          | 0.37173  | 2.35361  | 5.76E-06 |
| 1154483 | A_23_P47709    | FOLR2        | Homo sapiens folate receptor 2 (fetal) (FO NM_000803    | 0.37074  | 2.34821  | 0.00043  |
| 2314133 | A_33_P3233731  |              | PREDICTED: Homo sapiens hypothetical L XM_001716016     | 0.36944  | 2.34122  | 0.00113  |
| 884962  | A_23_P157593   | CHRNA6       | Homo sapiens cholinergic receptor, nicotini NM_004198   | 0.36826  | 2.33487  | 0.00331  |
| 2318660 | A_19_P00322102 |              | lincRNA:chr20:37075627-37079447 reverse strand          | 0.36787  | 2.33277  | 0.00611  |
| 2324370 | A_33_P3367396  | FAM177B      | Homo sapiens family with sequence similar NM_207468     | 0.36758  | 2.33121  | 3.73E-07 |
| 2325163 | A_33_P3332166  | PRSS38       | Homo sapiens protease, serine, 38 (PRSS3 NM_183062      | 0.36444  | 2.31441  | 0.00016  |
| 1158752 | A_24_P791040   | FBXW2        | Homo sapiens F-box and WD repeat domai NM_012164        | 0.36406  | 2.31237  | 0.00532  |
| 2330340 | A_33_P3410659  | CLEC12B      | Homo sapiens C-type lectin domain family NM_001129998   | 0.36088  | 2.29551  | 0.00345  |
| 1156982 | A_23_P131683   | MAPRE3       | Homo sapiens microtubule-associated prot NM_012326      | 0.35318  | 2.2552   | 0.00332  |
| 2315477 | A_33_P3245952  | LOC648570    | PREDICTED: Homo sapiens hypothetical L XR_114251        | 0.3528   | 2.25319  | 0.00641  |
| 2318589 | A_19_P00316576 |              | lincRNA:chrX:15693589-15706981 forward strand           | 0.3498   | 2.23767  | 5.29E-07 |
| 2332526 | A_33_P3229577  |              | Unknown                                                 | 0.34964  | 2.23685  | 0.00021  |
| 2329608 | A_33_P3345051  | LOC645971    | Homo sapiens hypothetical protein LOC64: NM_001195256   | 0.34675  | 2.22203  | 0.00031  |
| 2325487 | A_19_P00800754 |              | lincRNA:chr17:67543555-67550405 reverse strand          | 0.34306  | 2.20325  | 3.25E-06 |
| 881436  | A_23_P349025   | SAMD15       | Homo sapiens sterile alpha motif domain c NM_001010860  | 0.3405   | 2.19026  | 0.00702  |
| 1163020 | A_23_P28598    | DLX2         | Homo sapiens distal-less homeobox 2 (DL NM_004405       | 0.34041  | 2.18984  | 8.48E-06 |
| 2332264 | A_33_P3305655  | BCL8         | Homo sapiens B-cell CLL/lymphoma 8 (BC NR_027992        | 0.33954  | 2.18544  | 0.00503  |
| 2327154 | A_33_P3299921  | LOC100128869 | PREDICTED: Homo sapiens hypothetical pi XM_001719518    | 0.33802  | 2.17782  | 0.00151  |
| 2317623 | A_33_P3223106  | ZNF890P      | Homo sapiens zinc finger protein 890, pseu NR_034163    | 0.33742  | 2.17479  | 0.00085  |
| 2333960 | A_19_P00808290 |              | lincRNA:chr1:173968527-173991054 reverse strand         | 0.33539  | 2.16468  | 1.04E-06 |
| 883113  | A_23_P26325    | CCL17        | Homo sapiens chemokine (C-C motif) ligan NM_002987      | 0.33438  | 2.15965  | 0.00546  |
| 2335320 | A_33_P3375541  | CD3D         | Homo sapiens CD3d molecule, delta (CD3- NM_000732       | 0.33356  | 2.15554  | 0.00003  |
| 2326691 | A_19_P00813402 |              | lincRNA:chr6:107214007-107223757 reverse strand         | 0.33326  | 2.15408  | 0.00761  |
| 2334397 | A_33_P3389599  |              | Unknown BX457161                                        | 0.33103  | 2.14305  | 0.00543  |
| 2331879 | A_33_P3274134  | TMEM151B     | Homo sapiens transmembrane protein 151E NM_001137560    | 0.33039  | 2.13986  | 1.40E-06 |
| 2333296 | A_33_P3313528  |              | Synthetic construct Homo sapiens gatewa: CU693037       | 0.32982  | 2.13708  | 0.00738  |
| 2335629 | A_33_P3296975  | LOC390251    | Homo sapiens cDNA FLJ36034 fis, clone T AK093353        | 0.32922  | 2.13413  | 0.00615  |
| 879351  | A_23_P398566   | NR4A3        | Homo sapiens nuclear receptor subfamily 4 NM_006981     | 0.327    | 2.12324  | 1.65E-10 |
| 882169  | A_24_P606538   | GGNBP1       | Homo sapiens gametogenetin binding prote NR_028361      | 0.32685  | 2.12249  | 0.00006  |
| 2321184 | A_19_P00321910 |              | lincRNA:chr15:69373187-69383734 forward strand          | 0.32619  | 2.11929  | 0.00013  |
| 2314868 | A_19_P00321645 |              | lincRNA:chr6:147185594-147232742 forward strand         | 0.32408  | 2.10901  | 0.00515  |
| 2316407 | A_33_P3370875  |              | Unknown                                                 | 0.32325  | 2.10498  | 0.00348  |
| 2315860 | A_33_P3260974  |              | DA734158 NT2RP2 Homo sapiens cDNA cl DA734158           | 0.32109  | 2.09455  | 5.20E-06 |
| 2328112 | A_33_P3291160  |              | Unknown                                                 | 0.31965  | 2.0876   | 0.00027  |
| 1165393 | A_24_P100190   | C21orf93     | PREDICTED: Homo sapiens chromosome 2 XR_109883          | 0.31937  | 2.08626  | 4.96E-06 |
| 2326919 | A_33_P3315704  |              | Unknown                                                 | 0.31749  | 2.07728  | 0.00065  |
| 2320663 | A_33_P3365988  |              | full-length cDNA clone CS0DB007YO17 of CR621509         | 0.317    | 2.07491  | 0.00013  |
| 2324288 | A_19_P00805392 |              | lincRNA:chr11:34718449-34894824 reverse strand          | 0.31167  | 2.04959  | 0.00451  |
| 2333360 | A_19_P00331325 |              | lincRNA:chr14:101389472-101539847 forward strand        | 0.31037  | 2.04347  | 0.00628  |
| 1151529 | A_23_P83234    | ZBTB6        | Homo sapiens zinc finger and BTB domain NM_008626       | 0.30982  | 2.04088  | 0.00005  |
| 2332117 | A_33_P3219121  |              | Homo sapiens cDNA FLJ16443 fis, clone B AK131379        | 0.3091   | 2.0375   | 0.00305  |
| 1154014 | A_24_P917819   | ANKRD30BP2   | Homo sapiens ankyrin repeat domain 30B f NR_026916      | 0.30636  | 2.02472  | 7.21E-06 |
| 2312945 | A_19_P00809185 |              | lincRNA:chr19:15400850-15442450 forward strand          | 0.306    | 2.02303  | 0.00461  |
| 2329759 | A_19_P00316778 |              | lincRNA:chr2:114727021-114764885 reverse strand         | 0.30509  | 2.01878  | 0.00791  |
| 2327242 | A_33_P3357283  |              | gamma-glutamyltransferase 2 [Source:HG XM_001715205     | 0.30406  | 2.01401  | 0.00717  |
| 2322510 | A_33_P3383084  |              | Unknown                                                 | 0.30349  | 2.01134  | 0.00187  |
| 2327319 | A_19_P00316467 |              | lincRNA:chr3:98700043-98701392 forward strand           | 0.30349  | 2.01134  | 0.00063  |
| 1152101 | A_23_P144071   | COL7A1       | Homo sapiens collagen, type VII, alpha 1 (C NM_000094   | 0.30264  | 2.00743  | 0.00022  |
| 2329178 | A_19_P00315726 |              | lincRNA:chrX:16498858-16499989 reverse strand           | 0.30218  | 2.00528  | 0.00157  |
| 2324678 | A_33_P3303956  |              | PREDICTED: Homo sapiens hypothetical L XR_110658        | 0.30144  | 2.0019   | 0.00422  |
| 2322404 | A_33_P3414113  |              | PREDICTED: Homo sapiens fatty-acid ami XM_001129139     | 0.30125  | 2.001    | 0.00174  |
| 2315944 | A_33_P3225630  | LOC400706    | PREDICTED: Homo sapiens hypothetical L XR_111876        | -0.30193 | -2.00413 | 0.004    |
| 2326005 | A_19_P00803131 |              | lincRNA:chr1:247136652-247145277 forward strand         | -0.30215 | -2.00519 | 0.00068  |
| 2313209 | A_19_P00804779 |              | lincRNA:chr4:47840518-47846712 forward strand           | -0.30216 | -2.0052  | 0.00389  |
| 1155991 | A_24_P723735   |              | zinc finger protein 720 pseudogene 1 [Source:HGNC Symbc | -0.30283 | -2.0083  | 0.00021  |
| 2313469 | A_33_P3647427  | ZNF29P       | Human Kox26 mRNA for zinc finger proteir X52357         | -0.3031  | -2.00955 | 0.00001  |
| 2331829 | A_19_P00327983 |              | lincRNA:chr3:13807699-13818124 forward strand           | -0.30364 | -2.01208 | 0.00001  |
| 1156388 | A_24_P933011   | TMEM200C     | Homo sapiens transmembrane protein 200C NM_001080209    | -0.30376 | -2.01263 | 0.00004  |
| 1148946 | A_24_P230282   | VCX2         | Homo sapiens variable charge, X-linked 2 ( NM_016378    | -0.30385 | -2.01305 | 0.00672  |
| 2318281 | A_19_P00801549 |              | lincRNA:chr9:2756150-2773400 forward strand             | -0.30386 | -2.01308 | 0.00003  |
| 2319144 | A_19_P00327578 |              | lincRNA:chr8:90726603-90741628 forward strand           | -0.30397 | -2.01358 | 0.00012  |
| 1154471 | A_24_P330633   | TAT          | Homo sapiens tyrosine aminotransferase (1 NM_000353     | -0.30409 | -2.01413 | 0.00012  |
| 886284  | A_23_P301846   | CALCA        | Homo sapiens calcitonin-related polypeptic NM_001033952 | -0.30464 | -2.01672 | 0.002    |

Supplementary Table 2. Continued.

|         |                |              |                                                                    |          |          |          |
|---------|----------------|--------------|--------------------------------------------------------------------|----------|----------|----------|
| 1150043 | A_24_P205036   | ZNF676       | Homo sapiens zinc finger protein 676 (ZNF NM_001001411             | -0.30729 | -2.02902 | 9.08E-06 |
| 2313404 | A_19_P00327216 |              | lincRNA:chr2:238021286-238040461 forward strand                    | -0.30927 | -2.03829 | 5.33E-06 |
| 2329399 | A_19_P00327193 |              | lincRNA:chr5:131798076-131807951 reverse strand                    | -0.30966 | -2.04015 | 5.40E-06 |
| 2328505 | A_33_P3219454  |              | Unknown                                                            | -0.31027 | -2.04299 | 4.53E-06 |
| 2326359 | A_19_P00319351 |              | lincRNA:chr1:177994047-177994786 reverse strand                    | -0.31097 | -2.04632 | 0.00092  |
| 1151888 | A_24_P119131   | TMEM120B     | Homo sapiens transmembrane protein 120i NM_001080825               | -0.31147 | -2.04864 | 4.59E-06 |
| 2316705 | A_19_P00331004 |              | lincRNA:chr2:8001249-8036724 reverse strand                        | -0.31208 | -2.05154 | 0.00022  |
| 879966  | A_24_P131589   | GD86         | Homo sapiens CD86 molecule (CD86), tran NM_006889                  | -0.3127  | -2.05449 | 8.16E-11 |
| 2335390 | A_19_P00322365 |              | lincRNA:chr1:65195730-65196514 forward strand                      | -0.31426 | -2.06189 | 6.49E-06 |
| 2330431 | A_33_P3305250  |              | proteasome (prosome, macropain) 26S subunit, non-ATPase            | -0.3144  | -2.06253 | 0.00765  |
| 1157213 | A_23_P402331   | WFDC5        | Homo sapiens WAP four-disulfide core domain NM_145652              | -0.31518 | -2.06622 | 0.00806  |
| 1141309 | A_24_P366122   | ACBD4        | Homo sapiens acyl-CoA binding domain co NM_024722                  | -0.3154  | -2.06728 | 3.53E-06 |
| 2333356 | A_33_P3268686  | FBXW12       | Homo sapiens F-box and WD repeat domain NM_207102                  | -0.31559 | -2.06818 | 0.00698  |
| 2322123 | A_19_P00331381 |              | lincRNA:chr4:1036950-1047200 reverse strand                        | -0.31645 | -2.07229 | 5.90E-06 |
| 2312881 | A_33_P3262575  | BAIAP2L1     | Homo sapiens BAI1-associated protein 2-1 NM_018842                 | -0.31677 | -2.07379 | 0.00003  |
| 2319594 | A_33_P3350549  |              | Unknown                                                            | -0.3171  | -2.0754  | 3.20E-06 |
| 2332603 | A_19_P00320413 |              | lincRNA:chr6:158658627-15866616 forward strand                     | -0.31712 | -2.0755  | 0.00004  |
| 2336321 | A_33_P3377346  | LOC100132526 | Homo sapiens FYVE, RhoGEF and PH domain NR_036481                  | -0.3178  | -2.07873 | 0.00074  |
| 2316068 | A_33_P3403254  | ZNF878       | Homo sapiens zinc finger protein 878 (ZNF NM_001080404             | -0.31918 | -2.08538 | 0.00098  |
| 2327568 | A_33_P3397613  |              | Unknown                                                            | -0.31937 | -2.08628 | 0.00794  |
| 2326697 | A_19_P00812923 |              | lincRNA:chr11:3402374-3408174 reverse strand                       | -0.31938 | -2.08629 | 0.00155  |
| 2315562 | A_33_P3216621  |              | Unknown                                                            | -0.31952 | -2.08697 | 0.00013  |
| 2320519 | A_33_P3519223  |              | Unknown                                                            | -0.3197  | -2.08786 | 2.84E-06 |
| 2316242 | A_33_P3349384  |              | Unknown                                                            | -0.31986 | -2.08861 | 0.00002  |
| 2312589 | A_33_P3254751  | LOC100131355 | Homo sapiens cDNA FLJ42223 fis, clone T AK124217                   | -0.32007 | -2.08961 | 5.55E-06 |
| 2322341 | A_33_P3327762  |              | dedicator of cytokinesis 8 [Source:HGNC Symbol;Acc:1919]           | -0.3204  | -2.0912  | 0.00033  |
| 2331396 | A_19_P00332459 |              | lincRNA:chr4:24517527-24528051 reverse strand                      | -0.32073 | -2.09281 | 0.00005  |
| 2331481 | A_19_P00329574 |              | lincRNA:chr5:1544500-1567142 reverse strand                        | -0.32081 | -2.09318 | 2.57E-06 |
| 880649  | A_24_P183150   | CXCL3        | Homo sapiens chemokine (C-X-C motif) ligand 3 NM_002090            | -0.32102 | -2.0942  | 0.00011  |
| 2329459 | A_33_P3309526  | PTPRC        | Homo sapiens protein tyrosine phosphatase NM_002838                | -0.32232 | -2.10051 | 5.96E-11 |
| 2328114 | A_33_P3251640  | LOC284440    | Homo sapiens hypothetical LOC284440 (L1 NR_026956                  | -0.32318 | -2.10465 | 0.00108  |
| 1138925 | A_23_P397543   | NCRNA00174   | Homo sapiens non-protein coding RNA 174 NR_026873                  | -0.32328 | -2.10513 | 9.08E-06 |
| 2319869 | A_33_P3209326  |              | Homo sapiens cDNA FLJ39676 fis, clone S AK096995                   | -0.32448 | -2.11095 | 0.00585  |
| 1161430 | A_33_P370479   | POFUT1       | Homo sapiens protein O-fucosyltransferase NM_015352                | -0.32596 | -2.11816 | 2.83E-06 |
| 2335951 | A_19_P00324030 |              | lincRNA:chr1:79897287-79954287 reverse strand                      | -0.32609 | -2.11879 | 0.00556  |
| 2326964 | A_33_P3728979  | FAM151B      | Homo sapiens family with sequence similar NM_205548                | -0.32806 | -2.12843 | 0.0001   |
| 1159779 | A_32_P85042    | LOC100132815 | HCG2000535cDNA FLJ32177 fis, clone PL AK056856                     | -0.32956 | -2.13578 | 0.00012  |
| 2312680 | A_33_P3391105  | LRP1         | Homo sapiens low density lipoprotein receptor NM_002332            | -0.3298  | -2.13696 | 0.00016  |
| 2330012 | A_19_P00331635 |              | lincRNA:chr17:72093980-72101705 reverse strand                     | -0.3304  | -2.13993 | 1.65E-06 |
| 2326661 | A_33_P3396010  |              | Advanced glycosylation end product-specific A755628                | -0.33171 | -2.14637 | 0.00056  |
| 1163530 | A_23_P319859   | EYA2         | Homo sapiens eyes absent homolog 2 (Drosophila) NM_005244          | -0.33191 | -2.14737 | 0.00392  |
| 2321196 | A_33_P3324655  | C8orf41      | Homo sapiens chromosome 8 open reading frame 41 NM_025115          | -0.3325  | -2.15032 | 2.23E-06 |
| 2313913 | A_33_P3356811  | LCE1E        | Homo sapiens late cornified envelope 1E (L1) NM_178353             | -0.33318 | -2.15367 | 1.19E-06 |
| 882236  | A_23_P252236   | KLKB1        | Homo sapiens kallikrein B, plasma (Fletcher) NM_000892             | -0.33366 | -2.15605 | 0.00693  |
| 1159863 | A_24_P323967   | ZNF880       | Homo sapiens zinc finger protein 880 (ZNF NM_001145434             | -0.33376 | -2.15656 | 1.52E-06 |
| 1157638 | A_23_P106906   | PPL          | Homo sapiens periplakin (PPL), mRNA [NM NM_002705                  | -0.33904 | -2.18292 | 0.00789  |
| 1137083 | A_23_P28042    | ZNF737       | Homo sapiens zinc finger protein 737 (ZNF NM_001159293             | -0.34014 | -2.18849 | 8.43E-07 |
| 2319028 | A_19_P00806762 |              | lincRNA:chrX:73043635-73044133 forward strand                      | -0.34216 | -2.19866 | 0.00433  |
| 2329744 | A_19_P00327350 |              | lincRNA:chr9:114435054-114447929 forward strand                    | -0.34442 | -2.21013 | 0.00002  |
| 2332554 | A_19_P00324198 |              | lincRNA:chr2:74610317-74618792 forward strand                      | -0.34445 | -2.21028 | 0.00536  |
| 2336326 | A_19_P00800183 |              | lincRNA:chr2:81861889-82101789 forward strand                      | -0.34474 | -2.2118  | 4.12E-06 |
| 2329846 | A_19_P00319795 |              | lincRNA:chr19:56795502-56798051 reverse strand                     | -0.34488 | -2.21248 | 0.0038   |
| 2320559 | A_19_P00319186 |              | lincRNA:chr2:39197219-39200415 forward strand                      | -0.34525 | -2.21439 | 0.00562  |
| 2325344 | A_33_P3345623  | RREB1        | Homo sapiens ras responsive element binding protein 1 NM_001003700 | -0.34588 | -2.21758 | 0.00021  |
| 2319965 | A_19_P00330834 |              | lincRNA:chr10:65236069-65272719 forward strand                     | -0.34598 | -2.21809 | 1.58E-06 |
| 2335098 | A_19_P00812874 |              | lincRNA:chr14:91315547-91326047 reverse strand                     | -0.34656 | -2.22105 | 0.00015  |
| 2329987 | A_19_P00803183 |              | lincRNA:chr15:55466383-55471758 forward strand                     | -0.34774 | -2.22711 | 0.00373  |
| 2314049 | A_19_P00329233 |              | lincRNA:chr22:25408700-25464025 reverse strand                     | -0.34812 | -2.22907 | 4.90E-07 |
| 2327116 | A_19_P00324431 |              | lincRNA:chr7:55030831-55040930 forward strand                      | -0.34881 | -2.2326  | 2.12E-06 |
| 2334740 | A_33_P3243405  | GPR182       | Homo sapiens G protein-coupled receptor NM_007264                  | -0.3493  | -2.23514 | 0.00012  |
| 887556  | A_24_P322229   | RASL10B      | Homo sapiens RAS-like, family 10, member NM_033315                 | -0.34938 | -2.23551 | 0.00095  |
| 1165847 | A_32_P211248   | LOC100131138 | Homo sapiens hypothetical LOC100131138 NR_036513                   | -0.34981 | -2.23773 | 4.45E-07 |
| 2319651 | A_33_P3277883  | LOC100129931 | Homo sapiens hypothetical LOC100129931 NR_033828                   | -0.3507  | -2.24232 | 0.00213  |
| 2315796 | A_33_P3408034  |              | Unknown                                                            | -0.35151 | -2.24651 | 0.00448  |

Supplementary Table 2. Continued.

|         |                |              |                                                               |          |          |          |
|---------|----------------|--------------|---------------------------------------------------------------|----------|----------|----------|
| 2328255 | A_19_P00806091 |              | lincRNA:chr18:14053400-14102850 reverse strand                | -0.35236 | -2.25093 | 0.00684  |
| 1167425 | A_24_P717262   | LOC100131479 | PREDICTED: Homo sapiens zinc finger pro XM_001715121          | -0.35405 | -2.25971 | 0.00024  |
| 2320801 | A_19_P00810084 |              | lincRNA:chr2:37980796-38018431 reverse strand                 | -0.35411 | -2.25999 | 1.23E-06 |
| 2316022 | A_19_P00321087 |              | lincRNA:chrX:149129110-149131024 reverse strand               | -0.35482 | -2.26371 | 0.00002  |
| 1154604 | A_23_P161968   | SLC22A10     | Homo sapiens solute carrier family 22, men NM_001039752       | -0.35498 | -2.26451 | 0.0026   |
| 1159879 | A_23_P357966   | PCMTD1       | Homo sapiens protein-L-isoaspartate (D-a NM_052937            | -0.35735 | -2.27695 | 0.00005  |
| 2319480 | A_33_P3305203  | LOC283588    | PREDICTED: Homo sapiens hypothetical L:XR_110237              | -0.35912 | -2.28621 | 3.26E-06 |
| 1160021 | A_23_P309950   |              | family with sequence similarity 178, membe AL833126           | -0.35927 | -2.28704 | 0.00425  |
| 882121  | A_23_P22761    | SHOX         | Homo sapiens short stature homeobox (SH NM_006883             | -0.35962 | -2.28886 | 3.23E-06 |
| 2320503 | A_19_P00325227 |              | lincRNA:chr1:234908002-234918952 forward strand               | -0.36062 | -2.29416 | 2.33E-07 |
| 2328687 | A_19_P00321979 |              | lincRNA:chr15:58538381-58623829 reverse strand                | -0.36069 | -2.29449 | 0.00106  |
| 2326907 | A_33_P3267482  | KIAA1804     | Homo sapiens mixed lineage kinase 4 (KIA/ NM_032435           | -0.36099 | -2.2961  | 2.28E-07 |
| 2330783 | A_19_P00803630 |              | lincRNA:chr8:2522118-2527693 forward strand                   | -0.36121 | -2.29727 | 3.53E-07 |
| 2336271 | A_33_P3357516  | SLC10A7      | Homo sapiens solute carrier family 10 (sod NM_032128          | -0.36125 | -2.29749 | 0.00594  |
| 2336353 | A_33_P3629247  | ANKMY1       | Homo sapiens ankyrin repeat and MYND d NM_017844              | -0.36177 | -2.30023 | 2.50E-07 |
| 1152258 | A_23_P379789   | ST8SIA5      | Homo sapiens ST8 alpha-N-acetyl-neuram NM_013305              | -0.36192 | -2.30103 | 0.00051  |
| 885197  | A_32_P79434    | PTPRN2       | Homo sapiens protein tyrosine phosphatas NM_002847            | -0.36504 | -2.31761 | 6.12E-06 |
| 2319271 | A_19_P00331620 |              | lincRNA:chr12:96953169-96992769 forward strand                | -0.36531 | -2.31902 | 1.92E-07 |
| 886537  | A_24_P151      | KCNAB2       | Homo sapiens potassium voltage-gated ch NM_003636             | -0.36732 | -2.32979 | 0.00482  |
| 2313467 | A_33_P3280346  | LOC100130857 | Homo sapiens cDNA FLJ39731 fis, clone SAK097050               | -0.36783 | -2.33257 | 0.00067  |
| 2333726 | A_33_P3437283  | LOC643551    | Homo sapiens cDNA FLJ46123 fis, clone T AK128004              | -0.36814 | -2.33421 | 0.00012  |
| 2327234 | A_33_P3272808  | PTCD3        | Homo sapiens Pentatricopeptide repeat do NM_017952            | -0.36833 | -2.33525 | 0.00787  |
| 2335759 | A_19_P00317364 |              | lincRNA:chr17:75084917-75089529 reverse strand                | -0.36887 | -2.33814 | 0.00387  |
| 2326572 | A_33_P3311473  | ATP10D       | Homo sapiens ATPase, class V, type 10D (NM_020453             | -0.36959 | -2.34204 | 0.00136  |
| 2321740 | A_33_P3344504  |              | amyloid beta (A4) precursor protein-binding AK124794          | -0.36976 | -2.34294 | 8.74E-06 |
| 2320227 | A_19_P00330815 |              | lincRNA:chr11:2016408-2017024 forward strand                  | -0.36992 | -2.34382 | 0.00072  |
| 2315161 | A_33_P3327270  | TMED7-TICAM2 | Homo sapiens TMED7-TICAM2 readthroug NM_001164469             | -0.37207 | -2.35544 | 1.18E-07 |
| 2316746 | A_33_P3229809  | FLJ25363     | Homo sapiens similar to hypothetical prote NM_001145553       | -0.3724  | -2.35722 | 0.00047  |
| 2332458 | A_33_P3221980  | IL18RAP      | Homo sapiens interleukin 18 receptor acce NM_003853           | -0.37264 | -2.35853 | 1.18E-07 |
| 2327178 | A_19_P00809587 |              | lincRNA:chr8:96297524-96413824 reverse strand                 | -0.3728  | -2.35941 | 0.00003  |
| 2335651 | A_33_P3286011  |              | Unknown                                                       | -0.37388 | -2.36417 | 0.00685  |
| 2321044 | A_19_P00325965 |              | lincRNA:chr16:54944999-54959642 reverse strand                | -0.37497 | -2.37118 | 3.15E-06 |
| 2321597 | A_33_P3366412  |              | Unknown                                                       | -0.37499 | -2.3713  | 0.00033  |
| 2315363 | A_19_P00813490 |              | lincRNA:chr19:42419485-42425035 reverse strand                | -0.37566 | -2.37496 | 4.55E-07 |
| 2313344 | A_19_P00804439 |              | lincRNA:chr21:44751672-44819297 forward strand                | -0.37651 | -2.37965 | 0.00934  |
| 2327912 | A_33_P3259740  |              | PREDICTED: Homo sapiens FLJ44881 (FL:XR_110159                | -0.37662 | -2.38025 | 0.00156  |
| 2318457 | A_33_P3273000  | PTK2B        | Homo sapiens cDNA FLJ46514 fis, clone T AK128371              | -0.38015 | -2.39964 | 7.29E-08 |
| 1157164 | A_23_P346982   | DTWD2        | Homo sapiens DTW domain containing 2 (DNM_173666              | -0.38107 | -2.40477 | 0.00004  |
| 2320500 | A_33_P3305438  |              | Unknown                                                       | -0.38195 | -2.40961 | 8.54E-08 |
| 2327886 | A_19_P00325682 |              | lincRNA:chr14:61529972-61553247 forward strand                | -0.38453 | -2.42397 | 5.70E-08 |
| 2329943 | A_19_P00806723 |              | lincRNA:chr16:72454899-72460874 forward strand                | -0.38526 | -2.42807 | 0.00032  |
| 2333681 | A_19_P00812013 |              | lincRNA:chr17:54898751-54910251 forward strand                | -0.3862  | -2.43332 | 0.00662  |
| 1148028 | A_23_P155463   | LRRC2        | Homo sapiens leucine rich repeat containir NM_024512          | -0.38679 | -2.43663 | 1.59E-07 |
| 887803  | A_23_P44849    | KCTD13       | Homo sapiens potassium channel tetramer NM_178863             | -0.38946 | -2.45165 | 0.0001   |
| 2334377 | A_19_P00806946 |              | lincRNA:chr1:173758702-173765627 reverse strand               | -0.38992 | -2.45427 | 0.00005  |
| 2321374 | A_33_P3267562  | VAX2         | Homo sapiens ventral anterior homeobox 2 NM_012476            | -0.39112 | -2.46104 | 3.87E-08 |
| 1154114 | A_23_P79572    | MGC16025     | Homo sapiens hypothetical LOC85009 (MC NR_026664              | -0.39164 | -2.46401 | 1.68E-06 |
| 2324351 | A_19_P00811084 |              | lincRNA:chr2:200984605-201020245 forward strand               | -0.39271 | -2.47009 | 3.94E-08 |
| 1136711 | A_24_P174775   | NNT          | nicotinamide nucleotide transhydrogenase [Source:HGNC S       | -0.39282 | -2.4707  | 0.00001  |
| 2324601 | A_19_P00327469 |              | lincRNA:chr3:160980856-160994006 forward strand               | -0.39557 | -2.48638 | 0.00021  |
| 2334779 | A_33_P3403913  |              | H.sapiens mRNA sequence (16p11.2). [X69: X69637               | -0.39574 | -2.48736 | 0.00166  |
| 2331302 | A_19_P00330505 |              | lincRNA:chr5:1544500-1567142 reverse strand                   | -0.39604 | -2.48907 | 3.20E-08 |
| 2335532 | A_19_P00323968 |              | lincRNA:chr19:22019985-22034034 forward strand                | -0.3973  | -2.4963  | 0.0066   |
| 1162429 | A_23_P34233    | QPRT         | Homo sapiens quinolate phosphoribosyltr NM_014298             | -0.39844 | -2.50288 | 7.50E-06 |
| 1146316 | A_24_P522631   | TMEM201      | Homo sapiens transmembrane protein 201 NM_001130924           | -0.39847 | -2.50303 | 2.46E-08 |
| 2315981 | A_33_P3267463  |              | regulatory factor X, 3 (influences HLA class II expression) [ | -0.39976 | -2.5105  | 0.00038  |
| 2331565 | A_19_P00330145 |              | lincRNA:chr2:192556480-192568755 forward strand               | -0.3999  | -2.51133 | 0.00313  |
| 2315941 | A_33_P3212919  |              | BX092453 Soares_testis_NHT Homo sapien BX092453               | -0.40131 | -2.51946 | 0.00003  |
| 2327803 | A_33_P3279019  | SERPINB13    | Homo sapiens serpin peptidase inhibitor, cl NM_012397         | -0.4015  | -2.52059 | 6.99E-06 |
| 2325356 | A_33_P3254375  |              | PREDICTED: Homo sapiens similar to hCG XR_078855              | -0.40239 | -2.52573 | 0.00917  |
| 2327883 | A_19_P00813006 |              | lincRNA:chr4:53578624-53580302 reverse strand                 | -0.40469 | -2.53916 | 9.59E-08 |
| 1142797 | A_32_P187663   | ZNF596       | Homo sapiens zinc finger protein 596 (ZNF NM_001042416        | -0.4066  | -2.55038 | 4.52E-08 |
| 2316073 | A_33_P3244568  | LOC100128675 | Homo sapiens hypothetical LOC100128675 NR_024561              | -0.40676 | -2.55129 | 0.00372  |
| 2319478 | A_19_P00802496 |              | lincRNA:chr8:16347304-16355399 reverse strand                 | -0.40816 | -2.55955 | 2.16E-08 |



Supplementary Table 2. Continued.

|         |                |              |                                                          |              |          |          |          |
|---------|----------------|--------------|----------------------------------------------------------|--------------|----------|----------|----------|
| 1163490 | A_24_P161813   | LOC441666    | Homo sapiens zinc finger protein 91 pseud                | NR_024380    | -0.40862 | -2.56225 | 1.43E-08 |
| 2313118 | A_19_P00326936 |              | lincRNA:chr13:54673999-54701589 forward strand           |              | -0.40888 | -2.5638  | 0.00169  |
| 1141478 | A_24_P91701    | C22orf43     | Homo sapiens chromosome 22 open reading frame            | NM_016449    | -0.40897 | -2.56431 | 1.34E-08 |
| 2334462 | A_33_P3231086  |              | Unknown                                                  |              | -0.40964 | -2.56827 | 4.72E-07 |
| 2312458 | A_19_P00808500 |              | lincRNA:chr9:4869500-4896050 forward strand              |              | -0.4098  | -2.5692  | 0.00265  |
| 2333677 | A_33_P3221009  |              | Homo sapiens cDNA FLJ45966 fis, clone P AK127863         |              | -0.41    | -2.57042 | 6.64E-06 |
| 1141449 | A_23_P132889   | CRMP1        | Homo sapiens collapsin response mediator                 | NM_001014809 | -0.41333 | -2.59017 | 6.07E-09 |
| 1140043 | A_23_P416314   | HRASLS5      | Homo sapiens HRAS-like suppressor family                 | NM_054108    | -0.41342 | -2.59072 | 1.02E-08 |
| 1150263 | A_24_P67585    | VGLL3        | Homo sapiens vestigial like 3 ( <i>Drosophila</i> )      | (NM_016206)  | -0.41424 | -2.59561 | 1.05E-08 |
| 2331415 | A_19_P00802019 |              | lincRNA:chr6:3897476-3911792 forward strand              |              | -0.41629 | -2.60792 | 0.00417  |
| 2320097 | A_33_P3383009  |              | Unknown                                                  |              | -0.41704 | -2.6124  | 0.00544  |
| 2316820 | A_33_P3216438  | SPATA21      | Homo sapiens spermatogenesis associated                  | NM_198546    | -0.41932 | -2.62616 | 7.25E-09 |
| 1145439 | A_23_P50232    | AURKC        | Homo sapiens aurora kinase C (AURKC), tr                 | NM_001015878 | -0.41941 | -2.6267  | 7.18E-08 |
| 2327171 | A_33_P3251871  |              | Unknown                                                  |              | -0.41963 | -2.62803 | 1.17E-08 |
| 2331566 | A_33_P3570974  |              | Homo sapiens chromosome 8 open reading frame             | BC043205     | -0.42094 | -2.63597 | 0.00009  |
| 1144810 | A_32_P232035   | LOC100270746 | Homo sapiens hypothetical LOC100270746                   | NR_026776    | -0.42131 | -2.63822 | 1.66E-08 |
| 2326802 | A_33_P3262022  |              | Unknown                                                  |              | -0.42443 | -2.65723 | 1.47E-08 |
| 2322698 | A_33_P3311994  | KIAA1239     | Homo sapiens KIAA1239 (KIAA1239), mRNA                   | NM_001144990 | -0.42523 | -2.66213 | 0.00133  |
| 1143154 | A_32_P790284   | KATNAL2      | Homo sapiens katanin p60 subunit A-like 2                | NM_031303    | -0.42541 | -2.66327 | 0.00309  |
| 2318562 | A_33_P3229672  |              | PREDICTED: Homo sapiens similar to tubu                  | XR_016188    | -0.42913 | -2.68613 | 0.00985  |
| 2322027 | A_33_P3265415  |              | Unknown                                                  |              | -0.42934 | -2.68744 | 3.99E-09 |
| 2315136 | A_33_P3381613  |              | Unknown                                                  |              | -0.43038 | -2.69389 | 0.0028   |
| 2334265 | A_33_P3369920  | LOC100128402 | Homo sapiens cDNA FLJ42583 fis, clone BAK124574          |              | -0.43239 | -2.70637 | 0.00023  |
| 2328345 | A_19_P00806932 |              | lincRNA:chr18:4424357-4425507 reverse strand             |              | -0.43284 | -2.70922 | 0.00516  |
| 2316153 | A_19_P00328923 |              | lincRNA:chr5:127407926-127417781 reverse strand          |              | -0.43297 | -2.71001 | 5.49E-07 |
| 2335106 | A_19_P00319939 |              | lincRNA:chr2:114726900-114764885 reverse strand          |              | -0.43313 | -2.71102 | 0.00554  |
| 1167364 | A_23_P92650    | SLC25A2      | Homo sapiens solute carrier family 25 (mito)             | NM_031947    | -0.43457 | -2.72    | 0.00628  |
| 2327915 | A_19_P00319155 |              | lincRNA:chrX:115944898-115951828 reverse strand          |              | -0.43596 | -2.72874 | 0.00003  |
| 2335485 | A_19_P00318845 |              | lincRNA:chr10:4284540-4284771 reverse strand             |              | -0.43612 | -2.72973 | 0.00052  |
| 2325738 | A_33_P3414494  |              | Unknown                                                  |              | -0.438   | -2.74156 | 0.00038  |
| 2329029 | A_33_P3300635  | PFKFB2       | Homo sapiens 6-phosphofructo-2-kinase/                   | NM_008212    | -0.43825 | -2.74314 | 3.59E-17 |
| 2325276 | A_19_P00325176 |              | lincRNA:chr2:43102921-43110596 reverse strand            |              | -0.44044 | -2.75701 | 2.79E-09 |
| 2333678 | A_33_P3423420  | ZNF750       | Homo sapiens zinc finger protein 750 (ZNF)               | NM_024702    | -0.44085 | -2.75962 | 0.00021  |
| 2328177 | A_33_P3336720  | HAMP         | Homo sapiens hepcidin antimicrobial peptic               | NM_021175    | -0.44241 | -2.76956 | 2.51E-17 |
| 2328696 | A_19_P00811331 |              | lincRNA:chr5:135519476-135525376 reverse strand          |              | -0.44347 | -2.77635 | 0.00115  |
| 2322846 | A_33_P3380582  |              | PREDICTED: Homo sapiens hypothetical L                   | XR_108331    | -0.44375 | -2.77811 | 0.00019  |
| 1147621 | A_24_P910060   |              | Unknown                                                  |              | -0.44873 | -2.81013 | 0.00016  |
| 2329734 | A_19_P00319175 |              | lincRNA:chr5:126187125-126189758 forward strand          |              | -0.44883 | -2.81082 | 0.00005  |
| 2318939 | A_19_P00812662 |              | lincRNA:chr12:5377839-5428564 reverse strand             |              | -0.45419 | -2.84568 | 3.70E-09 |
| 2319423 | A_33_P3249529  | PCNX         | Homo sapiens pecanex homolog ( <i>Drosophila</i> )       | NM_014982    | -0.45932 | -2.87952 | 7.01E-10 |
| 2320680 | A_19_P00327912 |              | lincRNA:chr12:48037808-48056882 reverse strand           |              | -0.46179 | -2.89594 | 0.00019  |
| 2316033 | A_33_P3423017  |              | Unknown                                                  |              | -0.46196 | -2.89706 | 0.00139  |
| 2314425 | A_33_P3360758  |              | potassium voltage-gated channel, KQT-like subfamily, mem |              | -0.46376 | -2.90913 | 3.82E-09 |
| 880525  | A_23_P366376   | TDGF1        | Homo sapiens teratocarcinoma-derived growth              | NM_003212    | -0.46795 | -2.93729 | 0.00036  |
| 2326972 | A_19_P00806886 |              | lincRNA:chr7:26681650-26696300 reverse strand            |              | -0.46827 | -2.93945 | 0.00084  |
| 2332902 | A_19_P00812871 |              | lincRNA:chr14:74163472-74168555 reverse strand           |              | -0.47017 | -2.95236 | 0.0001   |
| 1159870 | A_23_P83579    | ARNT2        | Homo sapiens aryl-hydrocarbon receptor                   | r NM_014862  | -0.47109 | -2.95863 | 1.91E-14 |
| 2330341 | A_19_P00329166 |              | lincRNA:chrX:107264119-107280819 forward strand          |              | -0.4716  | -2.96208 | 7.50E-10 |
| 1152611 | A_23_P165239   | ZNF208       | Homo sapiens zinc finger protein 208 (ZNF)               | NM_007153    | -0.47211 | -2.9656  | 3.44E-09 |
| 2335381 | A_33_P3402943  | LOC100128591 | Homo sapiens cDNA FLJ46872 fis, clone UAK128705          |              | -0.47718 | -3.00038 | 0.00129  |
| 2332298 | A_19_P00329303 |              | lincRNA:chr4:127694975-127709825 reverse strand          |              | -0.47764 | -3.00355 | 0.00005  |
| 880639  | A_23_P424900   | C1orf88      | Homo sapiens chromosome 1 open reading frame             | NM_181643    | -0.47944 | -3.01607 | 0.00004  |
| 2326061 | A_33_P3349466  | ANKRD12      | Homo sapiens ankyrin repeat domain 12 (A)                | NM_015208    | -0.48053 | -3.02363 | 4.75E-08 |
| 2319462 | A_33_P3343972  | RSPH1        | Homo sapiens radial spoke head 1 homolog                 | NM_080860    | -0.48068 | -3.02466 | 0.00985  |
| 2334959 | A_19_P00323076 |              | lincRNA:chr2:3172193-3183118 reverse strand              |              | -0.48138 | -3.02957 | 0.00012  |
| 2324247 | A_33_P3264524  |              | Unknown                                                  |              | -0.484   | -3.04791 | 9.97E-06 |
| 2313588 | A_19_P00325431 |              | lincRNA:chr13:50657699-50697649 forward strand           |              | -0.48438 | -3.05054 | 0.00552  |
| 1156906 | A_23_P69970    | SOX30        | Homo sapiens SRY (sex determining region)                | NM_178424    | -0.48507 | -3.05542 | 0.00006  |
| 2319706 | A_19_P00319435 |              | lincRNA:chr5:42985502-43010278 forward strand            |              | -0.48525 | -3.0567  | 0.0006   |
| 882976  | A_32_P130630   | SLC16A7      | Homo sapiens solute carrier family 16, men               | NM_004731    | -0.48885 | -3.0821  | 1.17E-13 |
| 2331303 | A_19_P00329868 |              | lincRNA:chr12:97876744-97905794 reverse strand           |              | -0.48917 | -3.0844  | 0.00686  |
| 884239  | A_24_P47681    | CAND1        | Homo sapiens cullin-associated and neddy                 | NM_018448    | -0.49041 | -3.0932  | 9.29E-20 |
| 2322919 | A_19_P00805860 |              | lincRNA:chr1:9229531-9229931 reverse strand              |              | -0.49184 | -3.10341 | 2.37E-10 |
| 1147079 | A_23_P337849   | CELF3        | Homo sapiens CUGBP, Elav-like family member              | NM_007185    | -0.49186 | -3.10358 | 0.00032  |

Supplementary Table 2. Continued.

|         |                |              |                                                               |          |          |          |
|---------|----------------|--------------|---------------------------------------------------------------|----------|----------|----------|
| 2330683 | A_19_P00329806 |              | lincRNA:chr12:54356095-54362515 reverse strand                | -0.49253 | -3.10837 | 1.07E-10 |
| 2327579 | A_33_P3320212  |              | Unknown                                                       | -0.49435 | -3.12144 | 0.00331  |
| 1152443 | A_24_P15877    |              | Homo sapiens FKSG41 (FKSG41) mRNA, c AF333762                 | -0.49692 | -3.13996 | 0.0033   |
| 2335604 | A_33_P3230558  | EML5         | Homo sapiens echinoderm microtubule ass NM_183387             | -0.5075  | -3.21736 | 1.00E-06 |
| 2316268 | A_19_P00322295 |              | lincRNA:chr8:90737074-90737855 forward strand                 | -0.51111 | -3.24425 | 2.23E-09 |
| 869406  | A_23_P133408   | CSF2         | Homo sapiens colony stimulating factor 2 ( NM_000758          | -0.51236 | -3.25358 | 0.00871  |
| 2313109 | A_33_P3229017  |              | Unknown                                                       | -0.51301 | -3.25843 | 0.00065  |
| 2319903 | A_33_P3412463  | C10orf81     | Homo sapiens chromosome 10 open readin NM_001193434           | -0.51526 | -3.27535 | 0.0028   |
| 2318904 | A_33_P3417459  | SCARNA9L     | Homo sapiens small Cajal body-specific RN NR_023358           | -0.51602 | -3.28109 | 3.02E-11 |
| 2328020 | A_19_P00319946 |              | lincRNA:chr4:123621596-123626001 forward strand               | -0.51765 | -3.29344 | 0.00315  |
| 2333872 | A_19_P00321375 |              | lincRNA:chr15:25245397-25265969 reverse strand                | -0.52211 | -3.32742 | 0.00461  |
| 878987  | A_23_P64661    | ARHGAP9      | Homo sapiens Rho GTPase activating prot NM_032496             | -0.52456 | -3.34624 | 6.86E-06 |
| 2319854 | A_19_P00807924 |              | lincRNA:chr4:103337452-103350952 forward strand               | -0.52505 | -3.35002 | 0.0001   |
| 2325170 | A_33_P3278220  |              | Rab9 effector protein with kelch motifs [Sc AL832249          | -0.52621 | -3.35902 | 1.69E-11 |
| 2332950 | A_33_P3379046  | LOC729770    | PREDICTED: Homo sapiens hypothetical L: XR_112442             | -0.52955 | -3.38495 | 1.44E-11 |
| 2324069 | A_33_P3342720  | ATP2A1       | Homo sapiens ATPase, Ca <sup>++</sup> transporting, NM_173201 | -0.53156 | -3.40062 | 0.00253  |
| 2322084 | A_33_P3286552  | NOX1         | Homo sapiens NADPH oxidase 1 (NOX1), t NM_013955              | -0.53255 | -3.40837 | 0.00966  |
| 2333954 | A_33_P3226761  | SOX18        | Homo sapiens SRY (sex determining region NM_018419            | -0.53357 | -3.41638 | 2.45E-18 |
| 2335229 | A_33_P3411384  |              | Unknown                                                       | -0.53376 | -3.41787 | 1.13E-11 |
| 2319827 | A_33_P3236416  | GPR179       | Homo sapiens G protein-coupled receptor NM_001004334          | -0.53695 | -3.44314 | 8.91E-06 |
| 1150618 | A_23_P252276   | ARHGGEF38    | Homo sapiens Rho guanine nucleotide exci NM_017700            | -0.54082 | -3.47389 | 0.0001   |
| 2328169 | A_19_P00804666 |              | lincRNA:chr19:57769688-57777413 reverse strand                | -0.54653 | -3.51987 | 5.72E-12 |
| 2314874 | A_33_P3408514  | SCNN1D       | Homo sapiens sodium channel, nonvoltage- NM_001130413         | -0.54892 | -3.53931 | 0.00032  |
| 2318529 | A_33_P3385516  | CBLN4        | Homo sapiens cerebellin 4 precursor (CBLI NM_080617           | -0.55017 | -3.54954 | 1.40E-06 |
| 1167892 | A_23_P136571   | C1orf14      | Homo sapiens chromosome 1 open reading NM_030933              | -0.55178 | -3.56273 | 0.00146  |
| 2335869 | A_33_P3403666  | NDOR1        | Homo sapiens NADPH dependent diflavin c NM_001144026          | -0.55493 | -3.58866 | 0.00008  |
| 2314085 | A_19_P00321339 |              | lincRNA:chr3:158458205-158461305 forward strand               | -0.56196 | -3.64716 | 0.0001   |
| 1162299 | A_23_P79108    | ATP8B3       | Homo sapiens ATPase, aminophospholipid NM_138813              | -0.56509 | -3.67355 | 0.00155  |
| 2314250 | A_33_P3389168  |              | Unknown                                                       | -0.56811 | -3.69919 | 0.00035  |
| 1156659 | A_23_P350005   | TRIML2       | Homo sapiens tripartite motif family-like 2 NM_173553         | -0.58515 | -3.84728 | 0.0003   |
| 2334404 | A_33_P3372094  | LLGL1        | Homo sapiens lethal giant larvae homolog 1 NM_004140          | -0.58558 | -3.85104 | 0.00764  |
| 1161697 | A_24_P358868   | ZNF728       | PREDICTED: Homo sapiens zinc finger, pro XM_001720936         | -0.58892 | -3.88081 | 8.00E-13 |
| 1156823 | A_23_P426835   | LOC729652    | Homo sapiens mRNA; cDNA DKFZp434L05 AL834536                  | -0.59516 | -3.93691 | 0.00503  |
| 2330608 | A_33_P3231252  | NHLH2        | Homo sapiens nascent helix loop helix 2 ( NM_005599           | -0.59724 | -3.95586 | 5.17E-13 |
| 2312755 | A_33_P3359183  | AWAT2        | Homo sapiens acyl-CoA with alcohol acyltr NM_001002254        | -0.59744 | -3.95768 | 0.00078  |
| 2330830 | A_19_P00812238 |              | lincRNA:chr7:106416539-106423571 reverse strand               | -0.60631 | -4.03938 | 0.00295  |
| 879661  | A_23_P321846   | KCNS1        | Homo sapiens potassium voltage-gated ch: NM_002251            | -0.61442 | -4.11546 | 0.00341  |
| 1142128 | A_23_P335388   | C17orf78     | Homo sapiens chromosome 17 open readin NM_173625              | -0.61938 | -4.16274 | 0.00458  |
| 2328283 | A_33_P3218491  |              | Unknown                                                       | -0.62034 | -4.17199 | 0.00062  |
| 2334258 | A_33_P3558740  | LOC254100    | Homo sapiens cDNA FLJ33054 fis, clone T AK057616              | -0.623   | -4.19759 | 0.00557  |
| 886248  | A_24_P380349   | HTR1E        | Homo sapiens 5-hydroxytryptamine (serotr NM_000865            | -0.62516 | -4.21848 | 0.0026   |
| 2322787 | A_33_P3213311  |              | Unknown                                                       | -0.62975 | -4.26333 | 5.47E-13 |
| 2325467 | A_33_P3355937  | LOC284276    | Homo sapiens hypothetical LOC284276 (L: NR_015417             | -0.63559 | -4.32102 | 0.00743  |
| 889063  | A_23_P1682     | TMEM45B      | Homo sapiens transmembrane protein 45B NM_138788              | -0.63674 | -4.3325  | 0.00366  |
| 2321140 | A_33_P3346618  | LOC441179    | PREDICTED: Homo sapiens hypothetical L: XR_112948             | -0.63788 | -4.3439  | 0.00004  |
| 1161571 | A_23_P132760   | TRH          | Homo sapiens thyrotropin-releasing hormo NM_007117            | -0.63889 | -4.354   | 1.18E-06 |
| 2328115 | A_19_P00328772 |              | lincRNA:chr14:71971647-71983097 reverse strand                | -0.64132 | -4.37845 | 0.00714  |
| 2333743 | A_33_P3547141  | LOC100131298 | Homo sapiens clone FLB4228 PRO1095 ml AF130053                | -0.64866 | -4.45307 | 0.00273  |
| 880654  | A_24_P156769   | MPL          | Homo sapiens myeloproliferative leukemia NM_005373            | -0.66797 | -4.6555  | 0.00076  |
| 1145663 | A_23_P209700   | NMUR1        | Homo sapiens neuromedin U receptor 1 (N NM_006056             | -0.67388 | -4.71928 | 3.67E-11 |
| 2328855 | A_33_P3210228  |              | zinc finger, CCHC domain containing 6 [Source:HGNC Symbl      | -0.67879 | -4.77302 | 0.00021  |
| 2331609 | A_19_P00326527 |              | lincRNA:chr15:75201097-75208047 forward strand                | -0.68055 | -4.79234 | 1.01E-14 |
| 886083  | A_23_P501722   | TSPAN32      | Homo sapiens tetraspanin 32 (TSPAN32), r NM_139022            | -0.69226 | -4.9233  | 0.00954  |
| 2312658 | A_19_P00330893 |              | lincRNA:chr11:129133890-129145940 reverse strand              | -0.69638 | -4.97032 | 0.00931  |
| 2328761 | A_33_P3400278  |              | Unknown                                                       | -0.69736 | -4.98149 | 0.00768  |
| 2318600 | A_33_P3209130  | LOC100128496 | CR738909 Soares_testis_NHT Homo sapien CR738909               | -0.69904 | -5.00076 | 0.00911  |
| 2333066 | A_33_P3400309  |              | Homo sapiens cDNA FLJ40251 fis, clone T AK097570              | -0.7004  | -5.01653 | 1.87E-07 |
| 2326278 | A_33_P3350268  |              | Unknown                                                       | -0.70327 | -5.04971 | 0.00848  |
| 2335976 | A_33_P3302577  | GPR133       | Homo sapiens G protein-coupled receptor NM_198827             | -0.71011 | -5.1299  | 0.00708  |
| 2321118 | A_33_P3266769  |              | Unknown                                                       | -0.71668 | -5.20806 | 0.00678  |
| 2322484 | A_33_P3421053  | SELE         | Homo sapiens selectin E (SELE), mRNA [N NM_000450             | -0.73631 | -5.44897 | 0.00421  |
| 1142788 | A_32_P135517   | LOC100506105 | PREDICTED: Homo sapiens hypothetical L: XR_109318             | -0.7395  | -5.48914 | 7.55E-13 |
| 2313679 | A_19_P00321221 |              | lincRNA:chr5:25413547-25446034 reverse strand                 | -0.74314 | -5.53523 | 0.00331  |
| 2327353 | A_33_P3326667  |              | Unknown                                                       | -0.74382 | -5.54397 | 0.0034   |

Supplementary Table 2. Continued.

|         |                |              |                                                        |          |           |          |
|---------|----------------|--------------|--------------------------------------------------------|----------|-----------|----------|
| 2327859 | A_19_P00800915 |              | lincRNA:chr2:156244304-156300229 reverse strand        | -0.74771 | -5.59387  | 0.00316  |
| 2318966 | A_33_P3358815  | DEFB103A     | Homo sapiens defensin, beta 103A (DEFB1 NM_001081551   | -0.74796 | -5.59709  | 0.00345  |
| 2327609 | A_33_P3408137  | LOC100130248 | Homo sapiens cDNA FLJ42222 fis, clone T AK124216       | -0.74815 | -5.59947  | 0.00072  |
| 869436  | A_23_P106194   | FOS          | Homo sapiens FBJ murine osteosarcoma v NM_005252       | -0.75    | -5.62342  | 1.13E-29 |
| 2315643 | A_33_P3305288  | PAQR9        | Homo sapiens progesterin and adipoQ recept NM_198504   | -0.7526  | -5.65719  | 0.00299  |
| 1159504 | A_32_P216734   | SPDYE3       | Homo sapiens speedy homolog E3 (Xenopus NM_001004351   | -0.7555  | -5.69508  | 0.00037  |
| 2320939 | A_19_P00322282 |              | lincRNA:chr3:185003349-185009534 reverse strand        | -0.75667 | -5.71047  | 0.00254  |
| 2319943 | A_19_P00331241 |              | lincRNA:chr13:24717800-24728575 forward strand         | -0.76386 | -5.80575  | 0.00163  |
| 2322749 | A_33_P3383626  | ZSCAN5D      | PREDICTED: Homo sapiens zinc finger and XM_001725568   | -0.77343 | -5.93519  | 2.98E-06 |
| 2319020 | A_33_P3237393  | ZNF140       | Homo sapiens zinc finger protein 140 (ZNF NM_003440    | -0.77577 | -5.96716  | 0.00058  |
| 2335021 | A_19_P00809030 |              | lincRNA:chr2:156877046-157111432 reverse strand        | -0.77756 | -5.99185  | 0.00078  |
| 881348  | A_23_P157007   | TMEM176B     | Homo sapiens transmembrane protein 176f NM_014020      | -0.77776 | -5.99461  | 0.00149  |
| 2312852 | A_33_P3410232  | LY6G6E       | Homo sapiens lymphocyte antigen 6 compl NR_024541      | -0.78134 | -6.04419  | 0.00123  |
| 2320045 | A_33_P3379081  |              | 601191189F1 NIH_MGC_7 Homo sapiens cf BE265920         | -0.78569 | -6.1051   | 0.00043  |
| 2314907 | A_33_P3395848  | VSIG10L      | Homo sapiens V-set and immunoglobulin d NM_001163922   | -0.78681 | -6.12085  | 0.00094  |
| 2335486 | A_33_P3280521  | MFAP3L       | Homo sapiens microfibrillar-associated pro NM_021647   | -0.78994 | -6.16504  | 0.00098  |
| 2318772 | A_33_P3350858  |              | Unknown                                                | -0.79366 | -6.21811  | 0.00044  |
| 2326429 | A_19_P00328380 |              | lincRNA:chr3:175987356-176039381 reverse strand        | -0.79594 | -6.25082  | 1.32E-16 |
| 2327988 | A_33_P3724157  | DERL3        | Homo sapiens Der1-like domain family, mem NM_198440    | -0.80575 | -6.39371  | 0.00069  |
| 1158569 | A_23_P152330   | DOC2A        | Homo sapiens double C2-like domains, alp1 NM_003586    | -0.80614 | -6.39941  | 2.90E-07 |
| 2334561 | A_33_P3301097  |              | Unknown                                                | -0.80975 | -6.45289  | 2.18E-16 |
| 2321677 | A_33_P3319276  | FAM178B      | Homo sapiens family with sequence similar NM_001122646 | -0.81043 | -6.46291  | 0.00065  |
| 2324809 | A_19_P00326849 |              | lincRNA:chr3:182651981-182660175 forward strand        | -0.86309 | -7.29609  | 0.00026  |
| 881671  | A_23_P325606   | ESX1         | Homo sapiens ESX homeobox 1 (ESX1), ml NM_153448       | -0.86696 | -7.36147  | 5.84E-14 |
| 2317540 | A_19_P00325785 |              | lincRNA:chr3:162922581-162942606 reverse strand        | -0.88275 | -7.63401  | 1.94E-07 |
| 2334680 | A_19_P00806038 |              | lincRNA:chr8:125471969-125486269 reverse strand        | -0.90779 | -8.08711  | 3.66E-18 |
| 2333913 | A_33_P3400302  | TTYT18       | Homo sapiens testis-specific transcript, Y- NR_001550  | -0.9151  | -8.22426  | 0.00196  |
| 1155346 | A_24_P59236    | RESP18       | Homo sapiens regulated endocrine-specific NM_001007089 | -0.93375 | -8.58523  | 2.39E-06 |
| 2334705 | A_33_P3230439  | LOC100130148 | Homo sapiens hypothetical LOC100130148 NR_024560       | -0.95808 | -9.07981  | 1.20E-06 |
| 2333644 | A_33_P3283974  |              | PREDICTED: Homo sapiens hypothetical L XR_109033       | -0.96951 | -9.32198  | 3.16E-14 |
| 2330300 | A_33_P3809497  | FLJ37505     | Homo sapiens hypothetical LOC400087 (FI NR_033987      | -1.03264 | -10.78065 | 7.50E-18 |
| 2327788 | A_33_P3300747  | ADHFE1       | Homo sapiens alcohol dehydrogenase, iron NM_144650     | -1.04097 | -10.98942 | 1.06E-17 |
| 2323682 | A_33_P3484806  | FLJ21408     | Homo sapiens cDNA: FLJ21408 fis, clone AK025061        | -1.05854 | -11.44295 | 2.01E-08 |
| 2316576 | A_19_P00806426 |              | lincRNA:chr14:64116297-64131817 forward strand         | -1.06559 | -11.63031 | 3.42E-13 |
| 882483  | A_24_P160380   | PDLIM2       | Homo sapiens PDZ and LIM domain 2 (mys NM_176871       | -1.0757  | -11.90407 | 8.28E-09 |
| 1144183 | A_23_P131588   | BMP10        | Homo sapiens bone morphogenetic protein NM_014482      | -1.10293 | -12.67441 | 1.51E-09 |
| 2334587 | A_33_P3350744  |              | Unknown                                                | -1.13005 | -13.49115 | 3.49E-12 |
| 2314863 | A_33_P3337569  | C4orf40      | Homo sapiens chromosome 4 open reading NM_214711       | -1.18329 | -15.25076 | 1.64E-11 |
| 2326840 | A_19_P00801412 |              | lincRNA:chr21:10701104-10873604 forward strand         | -1.20468 | -16.02052 | 4.16E-12 |
| 2334781 | A_33_P3358277  |              | potassium channel, subfamily K, member 1 AK090902      | -1.20969 | -16.20643 | 2.52E-12 |
| 2334273 | A_33_P3601802  |              | AGENCOURT_13978263 NIH_MGC_172 Hor CD049182            | -1.33241 | -21.49884 | 4.65E-20 |
| 2334403 | A_33_P3322348  | LOC100128942 | cDNA FLJ46600 fis, clone THYMU3047144 AK128457         | -1.59547 | -39.3979  | 5.49E-20 |
| 2334194 | A_19_P00802785 |              | lincRNA:chr3:72644685-72734460 reverse strand          | -1.64462 | -44.11792 | 1.53E-20 |
| 1150505 | A_23_P155539   | POU1F1       | Homo sapiens POU class 1 homeobox 1 (P NM_000306       | -1.85697 | -71.93966 | 8.77E-23 |
| 2334402 | A_19_P00805097 |              | lincRNA:chr5:88390860-88394207 forward strand          | -1.86544 | -73.35722 | 3.70E-22 |
| 1153025 | A_32_P26401    | C21orf54     | Homo sapiens chromosome 21 open readin NR_024102       | -2       | -100      | 1.10E-22 |
| 1140924 | A_23_P259003   | PEX5L        | Homo sapiens peroxisomal biogenesis factt NM_016559    | -2       | -100      | 2.21E-23 |

Supplementary Table 3. Changes in gene expression of no infection with respect to TW295CND.

| Sequence ID | Sequence Code  | Primary Sequence | Sequence Description                                              | Accession #    | Log(Ratio) | Fold Change | P-value  |
|-------------|----------------|------------------|-------------------------------------------------------------------|----------------|------------|-------------|----------|
| 2314508     | A_19_P00806374 |                  | lincRNA:chr11:123940940-123956165 reverse strand                  |                | 1.90317    | 80.01509    | 2.43E-22 |
| 1161927     | A_32_P12202    | FAM9C            | family with sequence similarity 9, member C [Source:HGNC BX648919 |                | 1.68436    | 48.34593    | 1.12E-18 |
| 2328902     | A_33_P3492042  |                  | Homo sapiens D21S2091E mRNA sequence. [AY063455]                  | AY063455       | 1.62944    | 42.60312    | 2.84E-21 |
| 882839      | A_23_P503059   | CNTN5            | Homo sapiens contactin 5 (CNTN5), transcript variant 1, mf        | NM_014361      | 1.31443    | 20.82667    | 7.64E-15 |
| 2331081     | A_19_P00322249 |                  | lincRNA:chr2:47558964-47559494 forward strand                     |                | 1.26467    | 18.39372    | 9.49E-14 |
| 2312785     | A_33_P3314559  | RAB3C            | Homo sapiens RAB3C, member RAS oncogene family (RAB;              | NM_138453      | 1.15607    | 14.32425    | 5.11E-11 |
| 1162083     | A_32_P88240    | KBTBD12          | Homo sapiens kelch repeat and BTB (POZ) domain containi           | NM_207335      | 1.12843    | 13.37922    | 3.05E-12 |
| 2313939     | A_33_P3374971  | TRIM53           | Homo sapiens tripartite motif-containing 53 (TRIM53), non-        | NR_028346      | 1.0753     | 11.89314    | 7.93E-09 |
| 2334309     | A_33_P3258772  | LOC100506816     | PREDICTED: Homo sapiens hypothetical LOC100506816 (L              | XR_108400      | 1.04514    | 11.09533    | 1.08E-09 |
| 2313252     | A_19_P00807378 |                  | lincRNA:chr8:102201249-102207349 forward strand                   |                | 0.99436    | 9.87086     | 3.86E-18 |
| 2313107     | A_33_P3344633  |                  | Homo sapiens mRNA; cDNA DKFZp88804191 (from clone [               | BX648590       | 0.96599    | 9.24674     | 1.98E-06 |
| 2317313     | A_19_P00801752 |                  | lincRNA:chr21:44751672-138421929 reverse strand                   |                | 0.93959    | 8.70132     | 4.62E-08 |
| 2314563     | A_33_P3224181  |                  | DA918960 SMINT2 Homo sapiens cDNA clone SMINT20039                | DA918960       | 0.92048    | 8.32677     | 0.00001  |
| 2329077     | A_33_P3417840  | C1orf47          | Homo sapiens cDNA FLJ26184 fis, clone ADG04431. [AK12             | AK129695       | 0.90927    | 8.11464     | 4.94E-08 |
| 1137600     | A_23_P20578    | FAM166B          | Homo sapiens family with sequence similarity 166, member          | NM_001164310   | 0.89564    | 7.86401     | 6.53E-06 |
| 2325731     | A_33_P3277688  | LOC100132344     | Homo sapiens cDNA FLJ43495 fis, clone PEBLM2000338. [             | AK125484       | 0.86967    | 7.40742     | 9.11E-16 |
| 887362      | A_24_P205894   | EPGN             | Homo sapiens epithelial mitogen homolog (mouse) (EPGN),           | i NM_001013442 | 0.8549     | 7.15977     | 0.00012  |
| 2312477     | A_33_P3295029  | KBTBD12          | Homo sapiens kelch repeat and BTB (POZ) domain containi           | NM_207335      | 0.84136    | 6.93998     | 0.00021  |
| 2314565     | A_19_P00323009 |                  | lincRNA:chr13:114598075-114624260 forward strand                  |                | 0.8108     | 6.46842     | 0.00053  |
| 2314005     | A_33_P3411165  | MAGEA2B          | Homo sapiens melanoma antigen family A, 2B (MAGEA2B),             | i NM_153488    | 0.78697    | 6.12308     | 0.00128  |
| 1143909     | A_23_P55632    | SERPINB3         | Homo sapiens serpin peptidase inhibitor, clade B (ovalbumi        | NM_008919      | 0.78693    | 6.12255     | 9.99E-06 |
| 1152070     | A_23_P97096    | OPTC             | Homo sapiens opticin (OPTC), mRNA [NM_014359]                     | NM_014359      | 0.78241    | 6.05918     | 3.02E-13 |
| 1158762     | A_24_P214858   | TREML2           | Homo sapiens triggering receptor expressed on myeloid cell        | NM_024807      | 0.7777     | 5.99373     | 0.00165  |
| 1138717     | A_24_P15898    |                  | Uncharacterized protein C1orf145 [Source:UniProtKB/Swi:           | BC027909       | 0.73879    | 5.48018     | 0.00299  |
| 2322483     | A_19_P00327099 |                  | lincRNA:chr8:138387843-138421643 reverse strand                   |                | 0.73821    | 5.47285     | 0.00323  |
| 2314004     | A_33_P3255051  | LOC100509927     | PREDICTED: Homo sapiens histone H2A type 1-like (LOC1             | XM_003119551   | 0.73676    | 5.4546      | 6.53E-07 |
| 2327998     | A_19_P00322181 |                  | lincRNA:chr9:132285766-132275963 reverse strand                   |                | 0.72252    | 5.27865     | 0.00544  |
| 1147952     | A_23_P92120    | SNTN             | Homo sapiens sentan, cilia apical structure protein (SNTN),       | NM_001080537   | 0.71986    | 5.24643     | 0.00671  |
| 2323167     | A_33_P3223488  | FRY              | Homo sapiens furry homolog (Drosophila) (FRY), mRNA [NV           | NM_023037      | 0.71923    | 5.23881     | 0.00181  |
| 2317358     | A_19_P00813235 |                  | lincRNA:chr2:75201792-75213492 reverse strand                     |                | 0.71402    | 5.17626     | 0.00007  |
| 885025      | A_23_P421379   | IGF2             | Homo sapiens insulin-like growth factor 2 (somatomedin A)         | NM_000612      | 0.71329    | 5.16758     | 2.60E-12 |
| 1168250     | A_24_P940086   | NXPH3            | Homo sapiens neurexophillin 3 (NXPH3), mRNA [NM_007225            | NM_007225      | 0.71218    | 5.15437     | 0.00651  |
| 2316833     | A_33_P3694746  |                  | Homo sapiens cDNA FLJ32224 fis, clone PLACE6004336. [             | AK056786       | 0.70889    | 5.11556     | 0.00009  |
| 2318719     | A_33_P3410274  |                  | Unknown                                                           |                | 0.70841    | 5.10987     | 0.00646  |
| 2313467     | A_33_P3280346  | LOC100130857     | Homo sapiens cDNA FLJ39731 fis, clone SMINT2015745. [A            | AK097050       | 0.70703    | 5.09364     | 0.00726  |
| 2316180     | A_19_P00802762 |                  | lincRNA:chr11:68040524-68046124 forward strand                    |                | 0.70684    | 5.09143     | 0.00647  |
| 2327743     | A_33_P3236322  |                  | Homo sapiens cDNA FLJ46124 fis, clone TESTI2040372. [A            | AK128005       | 0.70521    | 5.07237     | 0.00666  |
| 2314124     | A_19_P00315627 |                  | lincRNA:chr9:2493073-2521995 reverse strand                       |                | 0.69971    | 5.00853     | 1.01E-09 |
| 1158774     | A_32_P154223   | LOC100505683     | PREDICTED: Homo sapiens hypothetical LOC100505683 (L              | XR_109654      | 0.69863    | 4.99613     | 0.0077   |
| 1142822     | A_24_P6449     | SAMD7            | Homo sapiens sterile alpha motif domain containing 7 (SAM         | NM_182810      | 0.68887    | 4.88504     | 0.00331  |
| 2331574     | A_33_P3248405  | NRK              | Homo sapiens Nrk related kinase, mRNA (cDNA clone IMAG            | BC108702       | 0.68723    | 4.86662     | 0.00584  |
| 2329623     | A_33_P3255531  | LOC100129216     | Putative uncharacterized protein ENSP00000408391 [Sour            | XM_001721605   | 0.67661    | 4.74906     | 0.00001  |
| 2313788     | A_33_P3226395  | LOC389634        | Homo sapiens hypothetical LOC389634 (LOC389634), non-             | NR_024420      | 0.67279    | 4.70746     | 0.00504  |
| 2322295     | A_19_P00322426 |                  | lincRNA:chr7:26438479-26533639 forward strand                     |                | 0.66829    | 4.65897     | 0.00061  |
| 1136696     | A_32_P79591    | ZNF665           | Homo sapiens zinc finger protein 665 (ZNF665), mRNA [NM           | NM_024733      | 0.64473    | 4.41295     | 0.00918  |
| 2319999     | A_33_P3396562  | LOC642414        | PREDICTED: Homo sapiens putative tripartite motif-containi        | XM_003119181   | 0.63358    | 4.30109     | 8.20E-11 |
| 2327911     | A_33_P3331831  | DKFZp451A211     | PREDICTED: Homo sapiens DKFZp451A211 protein (DKFZ;               | XR_114721      | 0.6292     | 4.25796     | 0.0034   |
| 2316429     | A_33_P3222228  | FUT6             | Homo sapiens fucosyltransferase 6 (alpha (1,3) fucosyltrans       | NM_000150      | 0.62622    | 4.22879     | 0.00713  |
| 2320579     | A_33_P3235721  | C11orf87         | Homo sapiens chromosome 11 open reading frame 87 (C11c            | NM_207645      | 0.6155     | 4.12569     | 0.00169  |
| 2334591     | A_19_P00806184 |                  | lincRNA:chr5:81650244-81658219 reverse strand                     |                | 0.61245    | 4.09683     | 0.00915  |
| 2313712     | A_19_P00801712 |                  | lincRNA:chr17:73586330-73600280 reverse strand                    |                | 0.61005    | 4.07431     | 0.0088   |
| 2319826     | A_19_P00317553 |                  | lincRNA:chr16:83967316-83967785 forward strand                    |                | 0.60328    | 4.01123     | 0.00625  |
| 2314544     | A_33_P3352677  |                  | Novel protein [Source:UniProtKB/TrEMBL;Acc:G1AHE6] [E             | BG222044       | 0.60216    | 4.00095     | 1.66E-06 |
| 2318895     | A_33_P3228510  | EPB41L1          | Homo sapiens erythrocyte membrane protein band 4.1-like           | NM_177996      | 0.58544    | 3.84983     | 0.00502  |
| 2331563     | A_33_P3284611  |                  | Unknown                                                           |                | 0.58234    | 3.8224      | 0.00945  |
| 2322531     | A_19_P00810346 |                  | lincRNA:chr14:35749974-35756874 reverse strand                    |                | 0.57197    | 3.73227     | 0.0009   |
| 2324039     | A_19_P00805400 |                  | lincRNA:chr1:211564402-211589752 reverse strand                   |                | 0.56982    | 3.71382     | 0.00376  |
| 2329272     | A_33_P3372647  |                  | V1-11 protein fragment [Source:UniProtKB/TrEMBL;Acc:G             | DQ098690       | 0.58759    | 3.69477     | 0.00552  |
| 2322838     | A_33_P3244249  |                  | SH3 domain and tetratricopeptide repeats 2 [Source:HGNC           | AK127248       | 0.56205    | 3.64797     | 0.008    |
| 2317586     | A_19_P00320207 |                  | lincRNA:chr2:242832785-242833476 reverse strand                   |                | 0.5615     | 3.64337     | 0.00049  |
| 881873      | A_23_P319583   | RIMS3            | Homo sapiens regulating synaptic membrane exocytosis 3 (i         | NM_014747      | 0.54866    | 3.53718     | 0.00095  |
| 886673      | A_23_P126613   | AQP10            | Homo sapiens aquaporin 10 (AQP10), mRNA [NM_080429]               | NM_080429      | 0.5486     | 3.53674     | 0.00874  |
| 2328621     | A_33_P3317483  | CEMP1            | Homo sapiens cementum protein 1 (CEMP1), mRNA [NM_0C              | NM_001048212   | 0.54136    | 3.47822     | 0.0026   |
| 2331740     | A_19_P00812454 |                  | lincRNA:chr7:22666693-22667114 reverse strand                     |                | 0.5353     | 3.43008     | 0.00058  |
| 882611      | A_32_P14721    | DNAH12           | Homo sapiens dynein, axonemal, heavy chain 12 (DNAH12),           | NM_178504      | 0.51989    | 3.31048     | 0.00241  |
| 2313938     | A_33_P3236628  |                  | branched chain keto acid dehydrogenase E1, alpha polypept         | AL833143       | 0.51407    | 3.26642     | 0.00253  |
| 2328317     | A_19_P00811207 |                  | lincRNA:chr6:108346507-108355057 reverse strand                   |                | 0.51283    | 3.25712     | 0.00489  |
| 2325078     | A_33_P3246523  | OR2T1            | Homo sapiens olfactory receptor, family 2, subfamily T, men       | NM_030904      | 0.51199    | 3.25083     | 0.0014   |

Supplementary Table 3. Continued.

|         |                |              |                                                                          |         |         |          |
|---------|----------------|--------------|--------------------------------------------------------------------------|---------|---------|----------|
| 2321730 | A_33_P3503408  | LOC221946    | Homo sapiens hypothetical protein LOC221946, mRNA (cDI BC044606)         | 0.51086 | 3.24237 | 0.00686  |
| 2328383 | A_19_P00805092 |              | lincRNA:chr2:172618479-172626629 reverse strand                          | 0.51046 | 3.2394  | 0.0087   |
| 2322364 | A_33_P3353630  |              | Unknown                                                                  | 0.49993 | 3.16175 | 3.20E-06 |
| 2334182 | A_19_P00316874 |              | lincRNA:chr2:129153697-129402710 forward strand                          | 0.49322 | 3.11329 | 0.00861  |
| 2334835 | A_33_P3371341  | FAM66C       | Homo sapiens family with sequence similarity 66, member C NR_026788      | 0.49106 | 3.09782 | 0.00286  |
| 2315322 | A_19_P00319407 |              | lincRNA:chr4:53609750-53611888 reverse strand                            | 0.48737 | 3.07165 | 0.00325  |
| 1144046 | A_24_P291231   | PER3         | Homo sapiens period homolog 3 (Drosophila) (PER3), mRNA NM_016831        | 0.48207 | 3.03437 | 0.0002   |
| 2325373 | A_33_P3398693  | MFS2B        | Homo sapiens major facilitator superfamily domain containir NM_001080473 | 0.48168 | 3.03163 | 0.00164  |
| 2329418 | A_33_P3550818  | LOC400541    | Homo sapiens cDNA FLJ38747 fis, clone KIDNE2012361. [A AK096066          | 0.48073 | 3.025   | 0.00553  |
| 1164008 | A_24_P203315   | CNIH2        | Homo sapiens cornichon homolog 2 (Drosophila) (CNIH2), m NM_182553       | 0.47543 | 2.98833 | 0.00292  |
| 1159204 | A_32_P146113   | C6orf81      | Homo sapiens chromosome 6 open reading frame 81 (C6orf81), r NM_145028   | 0.47373 | 2.97666 | 0.00718  |
| 1142175 | A_23_P33558    | LOC729164    | PREDICTED: Homo sapiens hCG1732469 (LOC729164), mis XR_109936            | 0.4714  | 2.98072 | 0.00715  |
| 2319581 | A_33_P3257252  | ZNF551       | Homo sapiens zinc finger protein 551 (ZNF551), mRNA [NM_138347           | 0.46794 | 2.93726 | 0.00642  |
| 2325148 | A_19_P00802270 |              | lincRNA:chr2:121828880-121802705 forward strand                          | 0.46572 | 2.92229 | 0.0095   |
| 2325475 | A_19_P00800274 |              | lincRNA:chr8:91113099-91397399 forward strand                            | 0.46411 | 2.91148 | 0.00274  |
| 885032  | A_23_P332221   | ARHGEF4      | Homo sapiens Rho guanine nucleotide exchange factor (GEI) NM_032995      | 0.4612  | 2.89201 | 0.00821  |
| 1139721 | A_24_P187614   | LOC100129648 | Homo sapiens cDNA FLJ40318 fis, clone TEST12030556. [A AK097637          | 0.45723 | 2.86572 | 0.00097  |
| 2319130 | A_33_P3384078  | AKD1         | Homo sapiens cDNA FLJ16163 fis, clone BRCAN2014229. [ AK131244           | 0.4544  | 2.84708 | 0.00884  |
| 1146573 | A_23_P390443   | SHISA7       | Homo sapiens shisa homolog 7 (Xenopus laevis) (SHISA7), r NM_001145176   | 0.45424 | 2.84606 | 0.00314  |
| 2332583 | A_33_P33241696 |              | solute carrier family 45, member 2 [Source:HGNC Symbol;A BC003597        | 0.45286 | 2.83697 | 0.00081  |
| 2321613 | A_33_P3331125  | SLOC2A12     | Homo sapiens solute carrier family 2 (facilitated glucose tra NM_145176  | 0.45142 | 2.82761 | 0.0076   |
| 2316065 | A_33_P3242632  | LOC646743    | Homo sapiens hypothetical LOC646743 (LOC646743), non- NR_033930          | 0.45049 | 2.82153 | 0.00354  |
| 2331898 | A_33_P3406811  |              | Unknown                                                                  | 0.43876 | 2.74638 | 0.00004  |
| 2314514 | A_33_P3323059  |              | Homo sapiens cDNA, FLJ97323. [AK307375] AK307375                         | 0.43319 | 2.71136 | 0.00069  |
| 2329571 | A_33_P3352887  | LOC388692    | Homo sapiens hypothetical LOC388692 (LOC388692), non- NR_027002          | 0.4295  | 2.68846 | 0.00478  |
| 1145990 | A_32_P180741   | TNK2         | Homo sapiens tyrosine kinase, non-receptor, 2 (TNK2), tran NM_001010938  | 0.42253 | 2.64563 | 0.00009  |
| 1140655 | A_24_P402415   | SYT14        | Homo sapiens synaptotagmin XIV (SYT14), transcript varior NM_153262      | 0.41972 | 2.62858 | 0.0011   |
| 2325268 | A_19_P00811072 |              | lincRNA:chr7:45019225-45026725 forward strand                            | 0.41115 | 2.5772  | 0.00007  |
| 2335146 | A_19_P00324823 |              | lincRNA:chr12:13116233-13122083 reverse strand                           | 0.40683 | 2.55171 | 0.00277  |
| 2333360 | A_19_P00331325 |              | lincRNA:chr14:101389472-101539847 forward strand                         | 0.40178 | 2.52218 | 0.00047  |
| 881215  | A_23_P63158    | SPTA1        | Homo sapiens spectrin, alpha, erythrocytic 1 (elliptocytosis NM_003126   | 0.3988  | 2.50496 | 0.0022   |
| 2318879 | A_19_P00327442 |              | lincRNA:chr4:56803193-56814239 forward strand                            | 0.39721 | 2.49578 | 0.00016  |
| 2316456 | A_33_P3380493  | SH3BGL3      | Homo sapiens SH3 domain binding glutamic acid-rich protei NM_031288      | 0.39538 | 2.48533 | 0.00003  |
| 1160422 | A_23_P165380   | CRYGA        | Homo sapiens crystallin, gamma A (CRYGA), mRNA [NM_01_014617             | 0.39447 | 2.48013 | 0.00014  |
| 1146142 | A_23_P63432    | RHBDL2       | Homo sapiens rhomboid, veinlet-like 2 (Drosophila) (RHBDL NM_017821      | 0.39444 | 2.47991 | 0.00232  |
| 2334855 | A_33_P3418838  |              | PREDICTED: Homo sapiens hypothetical protein LOC10013 XM_001716008       | 0.38759 | 2.44112 | 0.00401  |
| 1160709 | A_23_P90980    | NEU2         | Homo sapiens sialidase 2 (cytosolic sialidase) (NEU2), mRN. NM_005383    | 0.38578 | 2.43097 | 0.0025   |
| 2322406 | A_19_P00811931 |              | lincRNA:chr5:88215119-88544444 forward strand                            | 0.38417 | 2.42195 | 0.00664  |
| 2322510 | A_33_P3383084  |              | Unknown                                                                  | 0.38039 | 2.40099 | 0.00018  |
| 2332526 | A_33_P3229577  |              | Unknown                                                                  | 0.37881 | 2.39225 | 0.00006  |
| 2321048 | A_33_P3314500  | MUC6         | Homo sapiens mucin 6, oligomeric mucus/gel-forming (MUC NM_005961        | 0.37765 | 2.38591 | 0.00809  |
| 2320006 | A_33_P3323939  | LIPN         | Homo sapiens lipase, family member N (LIPN), mRNA [NM_01_00102469        | 0.36945 | 2.34129 | 3.80E-07 |
| 1143171 | A_24_P175187   | SAMD9        | Homo sapiens sterile alpha motif domain containing 9 (SAM NM_017654      | 0.3688  | 2.33775 | 0.00061  |
| 1165812 | A_33_P3416069  |              | Human mRNA for T cell receptor V alpha gene segment V- X58747            | 0.36684 | 2.32722 | 0.00511  |
| 1158752 | A_24_P791040   | FBXW2        | Homo sapiens F-box and WD repeat domain containing 2 (F NM_012164        | 0.36671 | 2.32652 | 0.0041   |
| 1144104 | A_23_P128993   | GZMH         | Homo sapiens granzyme H (cathepsin G-like 2, protein h-C NM_033423       | 0.36577 | 2.32149 | 0.00158  |
| 1164435 | A_23_P24311    | ALDH3B2      | Homo sapiens aldehyde dehydrogenase 3 family, member B: NM_000695        | 0.36295 | 2.30647 | 0.00272  |
| 2329028 | A_19_P00316047 |              | lincRNA:chr18:37236595-37243620 reverse strand                           | 0.36198 | 2.30135 | 0.00136  |
| 2333629 | A_19_P00327304 |              | lincRNA:chr15:49013058-49023258 forward strand                           | 0.36127 | 2.29759 | 0.00215  |
| 1165207 | A_24_P212234   | SLC6A18      | Homo sapiens solute carrier family 6, member 18 (SLC6A18 NM_182632       | 0.35541 | 2.2668  | 0.00008  |
| 1161094 | A_23_P325887   | TBC1D8B      | Homo sapiens TBC1 domain family, member 8B (with GRAN NM_017752          | 0.35285 | 2.25348 | 0.0046   |
| 2331931 | A_19_P00812681 |              | lincRNA:chr2:39721271-39800646 forward strand                            | 0.35208 | 2.24945 | 0.00009  |
| 1155891 | A_23_P100660   | SERPINF1     | Homo sapiens serpin peptidase inhibitor, clade F (alpha-2 ai NM_002615   | 0.35171 | 2.24754 | 0.00289  |
| 1153205 | A_23_P26072    |              | HCG37415PRO1914 ; [Source:UniProtKB/TR/EMBL;Acc:Q9L AF118084             | 0.35166 | 2.24731 | 0.0001   |
| 1163020 | A_23_P28598    | DLX2         | Homo sapiens distal-less homeobox 2 (DLX2), mRNA [NM_C NM_004405         | 0.35137 | 2.24578 | 2.74E-06 |
| 2333034 | A_19_P00810219 |              | lincRNA:chr6:12005039-12011214 forward strand                            | 0.34903 | 2.23375 | 6.72E-06 |
| 2321189 | A_19_P00322525 |              | lincRNA:chr4:6672449-6675450 forward strand                              | 0.34585 | 2.21745 | 0.0044   |
| 2320879 | A_33_P3232742  |              | Unknown                                                                  | 0.33795 | 2.17746 | 0.0088   |
| 1146199 | A_32_P225659   | UTS2D        | Homo sapiens urotensin 2 domain containing (UTS2D), mRN NM_198152        | 0.3368  | 2.17172 | 0.00704  |
| 2332005 | A_33_P3240972  | LOC100134285 | PREDICTED: Homo sapiens hypothetical protein LOC10013 XM_003119593       | 0.33523 | 2.16385 | 0.00063  |
| 2327319 | A_19_P00316467 |              | lincRNA:chr3:98700043-98701392 forward strand                            | 0.33481 | 2.16175 | 0.00018  |
| 2327088 | A_33_P3313456  | CXorf30      | Homo sapiens chromosome X open reading frame 30 (CXorf NM_001098843      | 0.33126 | 2.14418 | 0.00545  |
| 881965  | A_23_P399078   | TIMP3        | Homo sapiens TIMP metalloproteinase inhibitor 3 (TIMP3), m NM_000362     | 0.33077 | 2.14174 | 0.00058  |
| 2318111 | A_19_P00801580 |              | lincRNA:chr22:25588075-25594350 reverse strand                           | 0.32967 | 2.13633 | 0.0001   |
| 2324929 | A_33_P3356070  | LPIN1        | Homo sapiens lipin 1 (LPIN1), mRNA [NM_145693] NM_145693                 | 0.32938 | 2.1349  | 0.0001   |
| 2326442 | A_33_P3383816  | LOC400657    | Homo sapiens hypothetical LOC400657 (LOC400657), non- NR_024484          | 0.32693 | 2.12289 | 0.00806  |
| 2324386 | A_19_P00802741 |              | lincRNA:chr2:179375079-179386329 reverse strand                          | 0.32542 | 2.11555 | 1.89E-06 |
| 2329326 | A_33_P3210349  |              | cDNA FLJ44904 fis, clone BRAMY3005656 [Source:UniPro XR_111612           | 0.32348 | 2.1061  | 0.00436  |
| 2336081 | A_33_P3388822  | ZNF233       | Homo sapiens zinc finger protein 233 (ZNF233), mRNA [NM_NM_181756        | 0.31811 | 2.08022 | 0.00169  |
| 1162207 | A_23_P166526   | RIBC2        | Homo sapiens RIB43A domain with coiled-coils 2 (RIBC2), r NM_015653      | 0.3172  | 2.07585 | 0.00705  |
| 1146871 | A_23_P722      | SYCP1        | Homo sapiens synaptonemal complex protein 1 (SYCP1), m: NM_003176        | 0.31452 | 2.0631  | 0.00383  |

Supplementary Table 3. Continued.

|         |                |              |                                                                                               |           |          |          |          |
|---------|----------------|--------------|-----------------------------------------------------------------------------------------------|-----------|----------|----------|----------|
| 2317335 | A_33_P3234540  |              | Unknown                                                                                       |           | 0.31417  | 2.06143  | 3.61E-06 |
| 2323001 | A_33_P3254708  | ARHGAP40     | Homo sapiens Rho GTPase activating protein 40 (ARHGAP40), NM_001164431                        |           | 0.31331  | 2.05735  | 0.00387  |
| 1136902 | A_23_P322116   | TFAP2E       | Homo sapiens transcription factor AP-2 epsilon (activating transcription factor 2), NM_178548 |           | 0.31236  | 2.05288  | 0.00821  |
| 2331879 | A_33_P3274134  | TMEM151B     | Homo sapiens transmembrane protein 151B (TMEM151B), n NM_001137560                            |           | 0.3101   | 2.04222  | 4.60E-06 |
| 2336008 | A_19_P00805168 |              | lincRNA:chr18:88805249-88810399 forward strand                                                |           | 0.30948  | 2.03928  | 0.00115  |
| 882428  | A_24_P314451   | F8           | Homo sapiens coagulation factor VIII, procoagulant component, NM_000132                       |           | 0.30946  | 2.03921  | 0.00362  |
| 1147167 | A_23_P211198   | C21orf67     | Homo sapiens chromosome 21 open reading frame 67 (C21orf67), NR_027129                        |           | 0.30935  | 2.03866  | 0.00022  |
| 2313537 | A_33_P3220853  |              | PREDICTED: Homo sapiens hCG1645016 (LOC646249), mis XR_041014                                 |           | 0.30808  | 2.03273  | 0.00973  |
| 2314068 | A_33_P3454679  |              | Unknown                                                                                       |           | 0.30617  | 2.02379  | 9.70E-06 |
| 2320078 | A_33_P3390217  |              | tubulin tyrosine ligase-like family, member 9 [Source:HGNC BC104025]                          |           | 0.30286  | 2.00845  | 0.00131  |
| 2321506 | A_33_P3347787  | LOC652022    | PREDICTED: Homo sapiens e3 ubiquitin-protein ligase MIB3, XM_941322                           |           | 0.30266  | 2.00754  | 0.00386  |
| 2327713 | A_33_P3305058  |              | Homo sapiens cDNA FLJ43238 fis, clone HCHON2007881. [AK125228]                                |           | -0.3031  | -2.00955 | 0.00253  |
| 2316603 | A_19_P00324072 |              | lincRNA:chr1:173968527-173991068 forward strand                                               |           | -0.30476 | -2.01724 | 0.00389  |
| 2317602 | A_33_P3303309  | LOC150622    | Homo sapiens hypothetical LOC150622 (LOC150622), non-coding, NR_026832                        |           | -0.30687 | -2.02709 | 0.00677  |
| 2334990 | A_33_P3212244  | KLRAP1       | Homo sapiens killer cell lectin-like receptor subfamily A pseudogene 1, NR_028045             |           | -0.31121 | -2.04743 | 0.00334  |
| 2316714 | A_19_P00808928 |              | lincRNA:chr2:74212792-74262017 forward strand                                                 |           | -0.3153  | -2.06681 | 0.00007  |
| 1165423 | A_24_P119201   | MBD2         | Homo sapiens methyl-CpG binding domain protein 2 (MBD2), NM_015832                            |           | -0.31984 | -2.08855 | 0.0024   |
| 2325438 | A_33_P3299634  | OR1L8        | olfactory receptor, family 1, subfamily L, member 8 [Source:AB529307]                         |           | -0.32191 | -2.09852 | 0.00243  |
| 2320227 | A_19_P00330815 |              | lincRNA:chr11:2016408-2017024 forward strand                                                  |           | -0.32444 | -2.11078 | 0.00276  |
| 2333098 | A_19_P00802503 |              | lincRNA:chr9:21879775-21938825 reverse strand                                                 |           | -0.32456 | -2.11137 | 0.00004  |
| 2315583 | A_33_P3257993  | RNF125       | Homo sapiens ring finger protein 125 (RNF125), mRNA [NM_017831]                               |           | -0.32501 | -2.11352 | 0.00581  |
| 2315617 | A_19_P00323876 |              | lincRNA:chr12:130608397-130621372 forward strand                                              |           | -0.32676 | -2.12205 | 0.00908  |
| 1145392 | A_23_P355776   |              | non-protein coding RNA 266B [Source:HGNC Symbol;Acc:3 XM_002342011]                           |           | -0.32723 | -2.12435 | 0.00339  |
| 2328665 | A_33_P3226129  |              | PREDICTED: Homo sapiens similar to ribosomal protein S7, XR_036913                            |           | -0.32759 | -2.12612 | 0.00658  |
| 2329097 | A_33_P3254320  | SH2D3A       | Homo sapiens SH2 domain containing 3A (SH2D3A), mRNA, NM_005490                               |           | -0.33216 | -2.14861 | 0.00278  |
| 1163975 | A_23_P57492    | SLC5A4       | Homo sapiens solute carrier family 5 (low affinity glucose), member 4, NM_014227              |           | -0.33705 | -2.17294 | 0.00487  |
| 2312680 | A_33_P3391105  | LRP1         | Homo sapiens low density lipoprotein receptor-related protein 1, NM_002332                    |           | -0.34238 | -2.19978 | 0.00006  |
| 2328986 | A_19_P00331229 |              | lincRNA:chr8:17355272-17386123 forward strand                                                 |           | -0.34696 | -2.22311 | 0.00002  |
| 2322777 | A_19_P00812893 |              | lincRNA:chr8:90815284-90628709 forward strand                                                 |           | -0.34798 | -2.22834 | 0.00831  |
| 889890  | A_23_P18078    | RARRES1      | Homo sapiens retinoic acid receptor responder (tazarotene), NM_002888                         |           | -0.34869 | -2.23198 | 2.90E-07 |
| 2328084 | A_33_P3338853  | LOC401233    | Homo sapiens HIV-1 Tat specific factor 1 pseudogene (LOC401233), NR_024561                    |           | -0.3525  | -2.25167 | 0.00549  |
| 1152502 | A_23_P362759   | PRDM5        | Homo sapiens PR domain containing 5 (PRDM5), mRNA [NM_018699]                                 |           | -0.35416 | -2.26025 | 0.00003  |
| 2329130 | A_19_P00316238 |              | lincRNA:chr1:26210871-26219098 reverse strand                                                 |           | -0.35856 | -2.2833  | 0.00205  |
| 2336026 | A_33_P3250055  | MAPK12       | Homo sapiens cDNA, FLJ98809. [AK308768]                                                       | AK308768  | -0.36282 | -2.3058  | 0.00005  |
| 2316073 | A_33_P3244568  | LOC100128675 | Homo sapiens hypothetical LOC100128675 (LOC100128675), NR_024561                              |           | -0.36656 | -2.32573 | 0.00885  |
| 883692  | A_23_P62588    | CALML6       | Homo sapiens calmodulin-like 6 (CALML6), mRNA [NM_138705]                                     |           | -0.37398 | -2.36579 | 0.00213  |
| 2335735 | A_33_P3287731  | MYST4        | Homo sapiens MYST histone acetyltransferase (monocytic), NM_012330                            |           | -0.37405 | -2.36618 | 0.0008   |
| 2313814 | A_19_P00321176 |              | lincRNA:chrX:110799569-110812724 reverse strand                                               |           | -0.37549 | -2.37406 | 0.00339  |
| 2313020 | A_33_P3410584  | LOC645586    | Homo sapiens cDNA FLJ25208 fis, clone RECO5984. [AK05 AK057937]                               |           | -0.37997 | -2.39865 | 0.00034  |
| 2313824 | A_33_P3651282  | SNORA20      | SNORA20 Human liver regeneration after partial hepatectomy, DW418857                          |           | -0.38413 | -2.42175 | 8.92E-08 |
| 2336113 | A_19_P00802450 |              | lincRNA:chr9:132236854-132272279 forward strand                                               |           | -0.38468 | -2.42482 | 0.00045  |
| 2313742 | A_33_P3347152  |              | suppressor of Ty 3 homolog (S. cerevisiae) [Source:HGNC Symbol;Acc:11466]                     |           | -0.38601 | -2.43225 | 0.00031  |
| 2335472 | A_33_P3260086  | BEAN1        | Homo sapiens brain expressed, associated with NEDD4, 1 (BEAN1), NM_001178020                  |           | -0.38682 | -2.43677 | 0.00913  |
| 2313782 | A_33_P3240773  |              | Unknown                                                                                       | CR607250  | -0.3884  | -2.44567 | 0.00355  |
| 2332215 | A_19_P00802011 |              | lincRNA:chr9:4869500-4896050 reverse strand                                                   |           | -0.39417 | -2.47841 | 4.23E-07 |
| 1150646 | A_23_P41314    | F11          | Homo sapiens coagulation factor XI (F11), mRNA [NM_000128]                                    |           | -0.39485 | -2.48228 | 0.00259  |
| 2319869 | A_33_P3209326  |              | Homo sapiens cDNA FLJ39876 fis, clone SMINT2009832. [AK096995]                                |           | -0.39715 | -2.49544 | 0.0003   |
| 2317707 | A_19_P00330956 |              | lincRNA:chr2:43148721-43166396 reverse strand                                                 |           | -0.39988 | -2.51118 | 0.00835  |
| 2333265 | A_33_P3615334  |              | Homo sapiens cDNA FLJ46134 fis, clone TEST12051873. [AK128015]                                |           | -0.40792 | -2.55811 | 0.00437  |
| 2312886 | A_33_P3331711  | LOC100130463 | Homo sapiens cDNA FLJ42307 fis, clone TRACH2005068. [AK124300]                                |           | -0.41029 | -2.57214 | 1.60E-08 |
| 1139580 | A_32_P129950   | NHLRC3       | Homo sapiens NHL repeat containing 3 (NHLRC3), transcript, NM_001012754                       |           | -0.41161 | -2.57992 | 1.41E-08 |
| 2327085 | A_33_P3300740  |              | PMO-GN0344-190201-003-d05 GN0344 Homo sapiens cDNA BI056255                                   |           | -0.41819 | -2.61931 | 0.00799  |
| 2315065 | A_33_P3809328  | PRO0471      | Homo sapiens PRO0471 mRNA, complete cds. [AF111846]                                           | AF111846  | -0.42324 | -2.64997 | 0.00258  |
| 2312878 | A_19_P00810938 |              | lincRNA:chr6:3176201-3194126 forward strand                                                   |           | -0.42796 | -2.67893 | 0.00024  |
| 2324488 | A_33_P3299122  | HNF1A        | H.sapiens HNF1-C mRNA. [X71347]                                                               | X71347    | -0.4296  | -2.68905 | 0.00654  |
| 2318015 | A_33_P3323934  |              | PREDICTED: Homo sapiens similar to JTV1 (LOC10012823), XR_038083                              |           | -0.45335 | -2.84017 | 0.00308  |
| 886923  | A_23_P32115    | LCN12        | Homo sapiens lipocalin 12 (LCN12), mRNA [NM_178536]                                           | NM_178536 | -0.45378 | -2.84303 | 0.00223  |
| 2329975 | A_33_P3277808  |              | Unknown                                                                                       |           | -0.45898 | -2.87726 | 2.06E-06 |
| 2319657 | A_33_P3383079  |              | Unknown                                                                                       |           | -0.46029 | -2.88593 | 0.00688  |
| 1160842 | A_23_P163697   | SYT17        | Homo sapiens synaptotagmin XVII (SYT17), mRNA [NM_016 NM_016524]                              |           | -0.46121 | -2.89206 | 3.20E-07 |
| 1145578 | A_32_P223173   |              | PREDICTED: Homo sapiens similar to acetyl-Coenzyme A synthetase, NR_037043                    |           | -0.46312 | -2.90483 | 1.89E-09 |
| 887209  | A_23_P256561   | TLR6         | Homo sapiens toll-like receptor 6 (TLR6), mRNA [NM_006060]                                    | NM_006060 | -0.47231 | -2.96692 | 5.39E-08 |
| 2320559 | A_19_P00319186 |              | lincRNA:chr2:39197219-39200415 forward strand                                                 |           | -0.47524 | -2.98702 | 0.00003  |
| 2313354 | A_19_P00328920 |              | lincRNA:chr12:65891133-66071408 reverse strand                                                |           | -0.48165 | -3.03146 | 0.00002  |
| 2320097 | A_33_P3383009  |              | Unknown                                                                                       |           | -0.48357 | -3.04487 | 0.00045  |
| 2314202 | A_19_P00803322 |              | lincRNA:chr11:88074377-88083852 forward strand                                                |           | -0.49053 | -3.09405 | 0.00733  |
| 2313592 | A_19_P00321740 |              | lincRNA:chr18:80251678-80254943 reverse strand                                                |           | -0.49203 | -3.10477 | 0.00685  |
| 2322438 | A_33_P3307490  |              | Homo sapiens cDNA FLJ45043 fis, clone BRAWH3021012. [AK126988]                                |           | -0.49367 | -3.11656 | 0.00256  |
| 1140995 | A_23_P254353   | NOXA1        | Homo sapiens NADPH oxidase activator 1 (NOXA1), mRNA, NM_006647                               |           | -0.49936 | -3.15035 | 1.54E-10 |
| 2313552 | A_33_P3321996  |              | DB053889 TEST12 Homo sapiens cDNA clone TEST120445, DB053889                                  |           | -0.50702 | -3.21378 | 2.94E-07 |
| 2315265 | A_33_P3260014  | TPO          | Homo sapiens thyroid peroxidase (TPO), transcript variant 1, NM_175721                        |           | -0.51881 | -3.30226 | 0.00399  |

Supplementary Table 3. Continued.

|         |                |              |                                                                           |          |          |          |
|---------|----------------|--------------|---------------------------------------------------------------------------|----------|----------|----------|
| 2317948 | A_19_P00316934 |              | lincRNA:chr8:58055261-58132001 forward strand                             | -0.51913 | -3.30468 | 0.00117  |
| 2333251 | A_19_P00326790 |              | lincRNA:chr7:106355964-106363089 reverse strand                           | -0.52782 | -3.37149 | 1.51E-07 |
| 2324883 | A_33_P3319860  | IFFO1        | Homo sapiens intermediate filament family orphan 1 (IFFO1), NR_036467     | -0.52955 | -3.38494 | 0.00227  |
| 1156659 | A_23_P350005   | TRIML2       | Homo sapiens tripartite motif family-like 2 (TRIML2), mRNA NM_173553      | -0.52969 | -3.38603 | 0.00132  |
| 860437  | A_23_P47728    | MAP6         | Homo sapiens microtubule-associated protein 6 (MAP6), trs NM_033063       | -0.53627 | -3.43774 | 1.43E-11 |
| 2333100 | A_33_P3227482  | FLJ43944     | Homo sapiens cDNA FLJ43944 fis, clone TESTI4014392. [AK125932             | -0.54336 | -3.49427 | 6.62E-06 |
| 2332940 | A_33_P3339990  | LOC100128429 | Homo sapiens cDNA FLJ41329 fis, clone BRAMY2047676. [AK123323             | -0.54752 | -3.52796 | 3.45E-07 |
| 2328822 | A_19_P00322673 |              | lincRNA:chr7:26438220-26519642 forward strand                             | -0.54851 | -3.53599 | 0.00589  |
| 1145139 | A_24_P332816   | RIMS2        | Homo sapiens regulating synaptic membrane exocytosis 2 (RIMS2), NM_014677 | -0.55269 | -3.57015 | 0.00712  |
| 1140073 | A_23_P431505   | XKR6         | Homo sapiens primary neuroblastoma cDNA, clone:Nbla004; AB073660          | -0.55294 | -3.5722  | 1.18E-10 |
| 2325684 | A_33_P3213792  | KCNK4        | Homo sapiens potassium channel, subfamily K, member 4 (KCNK4), NM_033310  | -0.55522 | -3.59102 | 0.00045  |
| 1147079 | A_23_P3337849  | CELF3        | Homo sapiens CUGBP, Elav-like family member 3 (CELF3), NM_007185          | -0.55579 | -3.61324 | 9.54E-06 |
| 2322193 | A_19_P00321950 |              | lincRNA:chr2:148790300-148791401 reverse strand                           | -0.5714  | -3.72736 | 0.00042  |
| 2319089 | A_19_P00800085 |              | lincRNA:chrX:73422428-73423502 forward strand                             | -0.57241 | -3.73599 | 0.00842  |
| 1143034 | A_23_P16694    | GPS1-IT      | Homo sapiens GPS1 intronic transcript (non-protein coding NR_002763       | -0.5732  | -3.74282 | 2.02E-06 |
| 2319233 | A_33_P3249958  | LOC642852    | Homo sapiens hypothetical LOC642852 (LOC642852), non- NR_026943           | -0.57607 | -3.76764 | 0.00244  |
| 2335923 | A_19_P00324364 |              | lincRNA:chr9:33011575-33024766 reverse strand                             | -0.57631 | -3.76975 | 0.00176  |
| 2318439 | A_33_P3403595  |              | Putative uncharacterized protein FLJ46792 [Source:UniProt AK128633        | -0.57792 | -3.78375 | 0.00374  |
| 2313741 | A_19_P00327103 |              | lincRNA:chr3:37886971-37901989 forward strand                             | -0.58031 | -3.8046  | 1.33E-11 |
| 2325561 | A_19_P00803876 |              | lincRNA:chr2:235342486-235379011 forward strand                           | -0.58109 | -3.81149 | 1.15E-12 |
| 2312797 | A_19_P00804825 |              | lincRNA:chr3:112308735-112319860 reverse strand                           | -0.58239 | -3.82285 | 2.67E-10 |
| 2312796 | A_19_P00320255 |              | lincRNA:chr15:21165302-21166134 forward strand                            | -0.58298 | -3.82806 | 0.00017  |
| 2312799 | A_33_P3370265  | LOC100508645 | PREDICTED: Homo sapiens hypothetical protein LOC10050 XM_003120021        | -0.58309 | -3.82902 | 0.00014  |
| 2325229 | A_33_P3368144  | LOC652614    | PREDICTED: Homo sapiens BOLA class I histocompatibility XM_942149         | -0.58731 | -3.8664  | 0.0064   |
| 882700  | A_24_P181254   | OLFM4        | Homo sapiens olfactomedin 4 (OLFM4), mRNA [NM_006418; NM_006418           | -0.58914 | -3.88276 | 0.00587  |
| 1164351 | A_24_P379353   | GCDC24       | Homo sapiens coiled-coil domain containing 24 (GCDC24), t NM_152499       | -0.60156 | -3.99542 | 1.06E-11 |
| 1149190 | A_24_P324712   | NPC1L1       | Homo sapiens NPC1 (Niemann-Pick disease, type C1, gene), NM_013389        | -0.60347 | -4.01305 | 0.00268  |
| 2334624 | A_19_P00322995 |              | lincRNA:chr3:156503913-156504373 reverse strand                           | -0.60767 | -4.05198 | 0.00021  |
| 2317899 | A_33_P3273767  |              | Unknown                                                                   | -0.61281 | -4.10027 | 0.00809  |
| 2314399 | A_33_P3275702  | FMO2         | Homo sapiens flavin containing monooxygenase 2 (non-func NM_001460        | -0.61666 | -4.1368  | 0.00049  |
| 1140861 | A_23_P385126   | DEPDC7       | Homo sapiens DEP domain containing 7 (DEPDC7), transcr NM_139160          | -0.6204  | -4.17258 | 0.00163  |
| 2330315 | A_19_P00321078 |              | lincRNA:chr19:52588083-52597524 forward strand                            | -0.63852 | -4.35029 | 8.36E-14 |
| 1138097 | A_24_P928969   | PTPN3        | Homo sapiens protein tyrosine phosphatase, non-receptor 1 NM_001145369    | -0.64097 | -4.37493 | 0.00151  |
| 1160116 | A_23_P164068   | DNAH9        | Homo sapiens dynein, axonemal, heavy chain 9 (DNAH9), trs NM_001372       | -0.6442  | -4.40762 | 0.00143  |
| 2317351 | A_33_P3808516  |              | Homo sapiens clone Z'3-1 placenta expressed mRNA from U86047              | -0.64429 | -4.40848 | 0.00243  |
| 1144094 | A_23_P31798    | NAT2         | Homo sapiens N-acetyltransferase 2 (arylamine N-acetyltr NM_000015        | -0.64784 | -4.44462 | 9.20E-16 |
| 2334258 | A_33_P3558740  | LOC254100    | Homo sapiens cDNA FLJ33054 fis, clone TRACH1000106. [AK057616             | -0.65371 | -4.50516 | 0.00203  |
| 2314489 | A_19_P00800302 |              | lincRNA:chr14:69118322-69174922 reverse strand                            | -0.65852 | -4.55536 | 0.00875  |
| 1161185 | A_23_P203267   | TRIM29       | Homo sapiens tripartite motif-containing 29 (TRIM29), mRN NM_012101       | -0.66856 | -4.66188 | 0.00042  |
| 1145452 | A_23_P23646    | USF1         | Homo sapiens upstream transcription factor 1 (USF1), trans NM_007122      | -0.6751  | -4.73263 | 3.06E-17 |
| 2325366 | A_33_P3395650  | PCDHGA5      | Homo sapiens protocadherin gamma subfamily A, 5 (PCDHC NM_032054          | -0.67669 | -4.75    | 0.00738  |
| 2314698 | A_19_P00323109 |              | lincRNA:chr12:97010269-97032694 forward strand                            | -0.67888 | -4.77398 | 0.00239  |
| 1151276 | A_24_P870620   | PTN          | Homo sapiens pleiotrophin (PTN), mRNA [NM_002825] NM_002825               | -0.68525 | -4.84449 | 0.00024  |
| 2314084 | A_19_P00809175 |              | lincRNA:chrX:11053954-11091179 reverse strand                             | -0.6854  | -4.8462  | 0.00979  |
| 2316717 | A_33_P3423984  |              | palladin, cytoskeletal associated protein [Source:HGNC Syn AK098458       | -0.6909  | -4.90792 | 0.00965  |
| 2313090 | A_19_P00320641 |              | lincRNA:chr16:72557245-72661585 reverse strand                            | -0.69126 | -4.91208 | 1.19E-14 |
| 880634  | A_23_P254768   | HCG4         | Homo sapiens HLA complex group 4 (HCG4), non-coding RI NR_002139          | -0.69362 | -4.93881 | 0.00876  |
| 2335810 | A_19_P00805748 |              | lincRNA:chr16:58783541-59142878 forward strand                            | -0.69364 | -4.93904 | 0.00791  |
| 1162739 | A_24_P84657    | MUC2         | Homo sapiens mucin 2, oligomeric mucus/gel-forming (MUC NM_002457         | -0.69462 | -4.95013 | 0.00776  |
| 2323266 | A_33_P3219537  | NCRNA00207   | Homo sapiens non-protein coding RNA 207 (NCRNA00207), NR_028409           | -0.69783 | -4.98685 | 0.00678  |
| 2325771 | A_33_P3570193  | FLJ36000     | Homo sapiens hypothetical FLJ36000 (FLJ36000), non-codi NR_027084         | -0.69924 | -5.00311 | 0.00523  |
| 2327782 | A_19_P00329113 |              | lincRNA:chr7:80367-84117 forward strand                                   | -0.70778 | -5.10252 | 4.47E-15 |
| 2319943 | A_19_P00331241 |              | lincRNA:chr13:24717800-24728575 forward strand                            | -0.70905 | -5.11744 | 0.00566  |
| 2312639 | A_19_P00317957 |              | lincRNA:chr19:11759250-11763258 reverse strand                            | -0.7129  | -5.16296 | 0.00523  |
| 2313551 | A_33_P3280471  | ERBB3        | Homo sapiens v-erb-b2 erythroblastic leukemia viral oncog NM_001982       | -0.71402 | -5.17628 | 0.00431  |
| 2315288 | A_19_P00802238 |              | lincRNA:chr10:103459185-103464735 reverse strand                          | -0.71792 | -5.22298 | 0.00533  |
| 2313500 | A_33_P3397507  |              | -adaptor-related protein complex 1, sigma 2 subunit [Source AK299921      | -0.71914 | -5.23772 | 0.00403  |
| 2312560 | A_33_P3228985  | LOC100132396 | Homo sapiens zinc finger protein 705D-like (LOC100132396 NM_001193630     | -0.7266  | -5.32838 | 0.00372  |
| 2325597 | A_33_P3314352  |              | Unknown                                                                   | -0.72743 | -5.33869 | 0.00325  |
| 885381  | A_23_P76322    | PIK3C2G      | Homo sapiens phosphoinositide-3-kinase, class 2, gamma p NM_004570        | -0.73251 | -5.40147 | 0.00007  |
| 2323131 | A_33_P3213617  |              | V_segment translation product Fragment [Source:UniProtK A25493            | -0.7368  | -5.45504 | 2.53E-07 |
| 2336019 | A_33_P3465703  | SNORA60      | 601888042F1 NIH_MGC_17 Homo sapiens cDNA clone IMAC BF304636              | -0.7399  | -5.49411 | 1.84E-14 |
| 2313028 | A_33_P3354688  |              | full-length cDNA clone CS0DB008YB20 of Neuroblastoma (CR625008            | -0.74303 | -5.5339  | 1.60E-15 |
| 2325776 | A_33_P3327642  | AIM1L        | Homo sapiens absent in melanoma 1-like (AIM1L), mRNA [ NM_001039775       | -0.74437 | -5.551   | 0.0001   |
| 2312771 | A_33_P3416757  | PRLR         | Homo sapiens prolactin receptor (PRLR), mRNA [NM_00094 NM_000949          | -0.74835 | -5.60213 | 0.00223  |
| 2316883 | A_33_P3209772  | POU4F1       | Homo sapiens POU class 4 homeobox 1 (POU4F1), mRNA [ NM_006237            | -0.74889 | -5.60844 | 0.00217  |
| 2312879 | A_19_P00318216 |              | lincRNA:chr8:129022630-129113453 reverse strand                           | -0.75216 | -5.65144 | 0.00203  |
| 2330096 | A_33_P3305710  |              | Unknown                                                                   | -0.75729 | -5.71858 | 0.00378  |
| 880995  | A_24_P216014   | GH2          | Homo sapiens growth hormone 2 (GH2), transcript variant 3 NM_022558       | -0.7612  | -5.77039 | 0.00002  |
| 2333946 | A_33_P3251801  | KLRG2        | Homo sapiens killer cell lectin-like receptor subfamily G, m NM_198508    | -0.76298 | -5.79407 | 0.00869  |
| 1138131 | A_32_P88415    | MYO23        | Homo sapiens myozenin 3 (MYO23), transcript variant 2, ml NM_133371       | -0.76392 | -5.80655 | 5.28E-16 |

Supplementary Table 3. Continued.

|         |                |              |                                                                        |          |           |          |
|---------|----------------|--------------|------------------------------------------------------------------------|----------|-----------|----------|
| 2325567 | A_19_P00322088 |              | lincRNA:chr16:11477618-11478888 reverse strand                         | -0.76513 | -5.82277  | 1.77E-11 |
| 2333164 | A_33_P3209135  |              | Unknown                                                                | -0.76689 | -5.84641  | 7.85E-06 |
| 2332688 | A_19_P00321586 |              | lincRNA:chrX:97828872-98120013 forward strand                          | -0.77403 | -5.9433   | 0.00111  |
| 2313011 | A_19_P00804574 |              | lincRNA:chr19:56789963-56824563 forward strand                         | -0.77426 | -5.94646  | 0.00116  |
| 2313318 | A_33_P3234482  | LOC100132919 | PREDICTED: Homo sapiens hypothetical protein LOC10013 XM_001715268     | -0.77534 | -5.96124  | 0.00091  |
| 889093  | A_23_P167585   | GDF9         | Homo sapiens growth differentiation factor 9 (GDF9), mRNA [NM_005260   | -0.77938 | -6.01704  | 3.89E-07 |
| 2329974 | A_33_P3346691  |              | Unknown                                                                | -0.7879  | -6.13825  | 0.0006   |
| 2316558 | A_19_P00319331 |              | lincRNA:chrX:53707036-53713697 reverse strand                          | -0.78942 | -6.15776  | 0.00087  |
| 2326173 | A_33_P3362063  | LOC440925    | Homo sapiens hypothetical LOC440925 (LOC440925), non- NR_027433        | -0.79096 | -6.17965  | 0.00071  |
| 2315136 | A_33_P3381613  |              | Unknown                                                                | -0.7941  | -6.22444  | 0.00001  |
| 2333453 | A_19_P00805888 |              | lincRNA:chr6:28134146-28139947 forward strand                          | -0.79613 | -6.25365  | 0.00037  |
| 886684  | A_23_P360924   | CLDN17       | Homo sapiens claudin 17 (CLDN17), mRNA [NM_012131] NM_012131           | -0.80314 | -6.3554   | 0.0003   |
| 2326094 | A_33_P3383189  | SP9          | Homo sapiens Sp9 transcription factor homolog (mouse) (SI NM_001145250 | -0.8115  | -6.4789   | 7.98E-17 |
| 1144506 | A_23_P42897    | MGAM         | Homo sapiens maltase-glucoamylase (alpha-glucoosidase) (v NM_004668    | -0.82548 | -6.69084  | 0.00019  |
| 2312654 | A_33_P3211968  | LOC100133207 | PREDICTED: Homo sapiens hypothetical LOC100133207 (L XR_110242         | -0.83235 | -6.79749  | 0.00019  |
| 2312824 | A_33_P3418571  |              | Unknown                                                                | -0.83401 | -6.82358  | 5.20E-07 |
| 1141675 | A_32_P78101    | IGSF21       | Homo sapiens immunoglobulin superfamily, member 21 (IGSF21) NM_032880  | -0.84127 | -6.9386   | 5.50E-10 |
| 2312798 | A_33_P3334000  |              | Unknown                                                                | -0.84694 | -7.02983  | 0.00012  |
| 2333099 | A_33_P3872115  | LOC727710    | Homo sapiens cDNA FLJ25723 fis, clone TST05459. [AK09] AK098589        | -0.86366 | -7.30571  | 0.00002  |
| 888487  | A_23_P33379    | RASGRF1      | Homo sapiens Ras protein-specific guanine nucleotide-rele. NM_002891   | -0.86497 | -7.32771  | 0.00006  |
| 887149  | A_23_P381172   | MRAP         | Homo sapiens melanocortin 2 receptor accessory protein (h NM_206898    | -0.89367 | -7.82837  | 1.99E-08 |
| 2332836 | A_33_P3369016  |              | PREDICTED: Homo sapiens hypothetical LOC645685 (LOC1 XM_928694         | -0.8938  | -7.83071  | 2.56E-08 |
| 2312922 | A_33_P3232273  |              | Unknown                                                                | -0.91591 | -8.23959  | 8.51E-08 |
| 2333317 | A_19_P00320499 |              | lincRNA:chr6:132224787-132228642 forward strand                        | -0.91961 | -8.31015  | 1.22E-13 |
| 2333382 | A_33_P3875570  | LOC100270679 | UI-1-BC1p-akz-b-02-0-ULs1 NCI_CGAP_PI3 Homo sapien: BQ013595           | -0.92175 | -8.35121  | 3.17E-06 |
| 888971  | A_23_P97402    | CAMK1G       | Homo sapiens calcium/calmodulin-dependent protein kinase NM_020439     | -0.93375 | -8.58523  | 6.51E-06 |
| 2330192 | A_19_P00328485 |              | lincRNA:chr5:124817426-124830024 reverse strand                        | -0.93549 | -8.61957  | 3.74E-12 |
| 2332403 | A_19_P00804120 |              | lincRNA:chr13:41416375-41460125 forward strand                         | -0.93602 | -8.63013  | 1.96E-14 |
| 1163074 | A_32_P84373    | FAM153C      | Homo sapiens family with sequence similarity 153, member NM_001079527  | -0.9466  | -8.8431   | 2.15E-06 |
| 2313088 | A_33_P3341007  |              | cDNA FLJ40133 fis, clone TEST12012231 [Source:UniProt] XR_114873       | -0.96792 | -9.28803  | 1.08E-07 |
| 2312663 | A_33_P3250699  |              | Unknown                                                                | -0.98173 | -9.58814  | 4.04E-07 |
| 1143081 | A_23_P91317    | RAD21L1      | Homo sapiens RAD21-like 1 (S. pombe) (RAD21L1), mRNA NM_001136566      | -0.98296 | -9.6153   | 1.50E-06 |
| 1142161 | A_32_P23308    | LOC257358    | Homo sapiens hypothetical LOC257358 (LOC257358), non- NR_026945        | -0.98956 | -9.76243  | 3.34E-07 |
| 2312753 | A_33_P3264857  | CYP27C1      | Homo sapiens cytochrome P450, family 27, subfamily C, pol NM_001001665 | -0.99717 | -9.93507  | 4.14E-15 |
| 1166646 | A_23_P38696    | DSC1         | Homo sapiens desmocollin 1 (DSC1), transcript variant Dsc NM_004948    | -0.99822 | -9.95912  | 2.75E-13 |
| 2326138 | A_33_P3361067  | ABCG2        | Homo sapiens ATP-binding cassette, sub-family G (WHITE) NM_004827      | -0.99899 | -9.97685  | 1.86E-20 |
| 2312599 | A_19_P00800410 |              | lincRNA:chr18:68000270-68008995 reverse strand                         | -1.00738 | -10.17138 | 1.18E-07 |
| 879364  | A_23_P155057   | CYTH4        | Homo sapiens cytohesin 4 (CYTH4), mRNA [NM_013385] NM_013385           | -1.01406 | -10.32905 | 7.73E-19 |
| 881712  | A_24_P267592   | SAMHD1       | Homo sapiens SAM domain and HD domain 1 (SAMHD1), m NM_015474          | -1.03336 | -10.78836 | 2.68E-19 |
| 888760  | A_23_P134139   | FABP7        | Homo sapiens fatty acid binding protein 7, brain (FABP7), m NM_001446  | -1.03401 | -10.8147  | 7.36E-12 |
| 2327866 | A_33_P3218316  | VSTM2B       | Homo sapiens V-set and transmembrane domain containing NM_001146339    | -1.04503 | -11.0926  | 1.15E-08 |
| 2328342 | A_19_P00807753 |              | lincRNA:chr5:67086094-67113044 reverse strand                          | -1.04571 | -11.10989 | 1.18E-17 |
| 1140900 | A_23_P259049   | SLC45A2      | Homo sapiens solute carrier family 45, member 2 (SLC45A2) NM_016180    | -1.11511 | -13.03499 | 7.12E-20 |
| 2330070 | A_33_P3409458  |              | Uncharacterized protein C9orf171 [Source:UniProtKB/Swiss-Prot;Acc:Q6ZC | -1.14373 | -13.923   | 1.86E-11 |
| 2334800 | A_33_P3723448  | ART3         | Homo sapiens ADP-ribosyltransferase 3 (ART3), transcript NM_001130017  | -1.17836 | -15.07864 | 8.45E-16 |
| 880981  | A_24_P25544    | GDNF         | Homo sapiens glial cell derived neurotrophic factor (GDNF), NM_000514  | -1.20466 | -16.01995 | 4.49E-16 |
| 2312865 | A_33_P3247589  |              | Unknown                                                                | -1.21262 | -16.31635 | 1.20E-12 |
| 1139286 | A_32_P202182   | SPDYE8P      | Homo sapiens speedy homolog E8 (Xenopus laevis), pseudo. NR_003664     | -1.23975 | -17.36789 | 2.10E-20 |
| 1160858 | A_23_P307570   | ABCC13       | Homo sapiens ATP-binding cassette, sub-family C (CFTR/I NR_003087      | -1.24306 | -17.50096 | 1.34E-13 |
| 2327680 | A_19_P00321448 |              | lincRNA:chr7:19970681-20008020 forward strand                          | -1.24691 | -17.65682 | 1.11E-13 |
| 2313089 | A_33_P3311543  |              | Unknown                                                                | -1.26456 | -18.38887 | 5.28E-20 |
| 2336005 | A_33_P3227736  | C6orf227     | Homo sapiens chromosome 6 open reading frame 227 (C6orf227) NR_027908  | -1.27418 | -18.80104 | 2.76E-13 |
| 1162291 | A_23_P215331   | CRHR2        | Homo sapiens corticotropin releasing hormone receptor 2 (i NM_001883   | -1.28339 | -19.20403 | 5.49E-22 |
| 1140976 | A_24_P30557    | TBX5         | Homo sapiens T-box 5 (TBX5), transcript variant 1, mRNA [NM_000192     | -1.29405 | -19.68121 | 4.95E-18 |
| 2332835 | A_19_P00324742 |              | lincRNA:chr5:54162493-54208143 forward strand                          | -1.30987 | -20.4114  | 6.82E-21 |
| 2332802 | A_33_P3404257  | VN1R103P     | Homo sapiens cDNA FLJ43558 fis, clone PROST2018607. [ AK125546         | -1.33867 | -21.81086 | 1.83E-20 |
| 2313136 | A_19_P00321802 |              | lincRNA:chr6:64472442-64498999 reverse strand                          | -1.33898 | -21.82626 | 1.14E-15 |
| 2333454 | A_19_P00329766 |              | lincRNA:chrX:115401722-115413847 forward strand                        | -1.34922 | -22.34698 | 2.43E-21 |
| 2332460 | A_33_P3265254  |              | Unknown                                                                | -1.35574 | -22.68483 | 4.34E-16 |
| 1141555 | A_23_P385199   | EPHA10       | Homo sapiens EPH receptor A10 (EPHA10), transcript varie NM_173641     | -1.39648 | -24.91625 | 1.09E-21 |
| 1147323 | A_23_P318472   | DNHD1        | Homo sapiens dynein heavy chain domain 1 (DNHD1), trans NM_144666      | -1.39871 | -25.0442  | 1.05E-21 |
| 2316774 | A_19_P00807075 |              | lincRNA:chr1:224624052-224647602 reverse strand                        | -1.40834 | -25.60584 | 3.77E-17 |
| 2325165 | A_33_P3358943  | GRM2         | Homo sapiens glutamate receptor, metabotropic 2 (GRM2), NM_000839      | -1.40849 | -25.61499 | 2.15E-21 |
| 882326  | A_23_P29608    | IQCF5        | Homo sapiens IQ motif containing F5 (IQCF5), mRNA [NM_C NM_001145059   | -1.42745 | -26.75789 | 2.40E-17 |
| 2333525 | A_19_P00319086 |              | lincRNA:chr8:122966846-123139423 reverse strand                        | -1.44404 | -27.79938 | 1.49E-21 |
| 2330100 | A_33_P3507270  | EFCAB5       | Homo sapiens EF-hand calcium binding domain 5 (EFCAB5) NM_198529       | -1.51262 | -32.55487 | 4.26E-19 |
| 879191  | A_23_P347610   | HAVCR1       | Homo sapiens hepatitis A virus cellular receptor 1 (HAVCR1) NM_012206  | -1.52206 | -33.27081 | 5.85E-21 |
| 2317054 | A_19_P00813078 |              | lincRNA:chr4:74537611-74598511 forward strand                          | -1.52792 | -33.72248 | 5.66E-22 |
| 2332859 | A_33_P3294277  | CYP4F3       | Homo sapiens cytochrome P450, family 4, subfamily F, poly( NM_000896   | -1.52822 | -33.74596 | 3.07E-21 |
| 1160252 | A_24_P169507   | MUC17        | Homo sapiens mucin 17, cell surface associated (MUC17), n NM_001040105 | -1.53063 | -33.93393 | 2.75E-19 |
| 882334  | A_24_P203000   | IL2RB        | Homo sapiens interleukin 2 receptor, beta (IL2RB), mRNA [ NM_000878    | -1.53412 | -34.20722 | 3.41E-21 |



Supplementary Table 3. Continued.

|         |                |           |                                                                        |          |           |          |
|---------|----------------|-----------|------------------------------------------------------------------------|----------|-----------|----------|
| 2312901 | A_19_P00323817 |           | lincRNA:chr11:129133890-129145940 forward strand                       | -1.55651 | -36.01689 | 1.39E-19 |
| 2332860 | A_19_P00804713 |           | lincRNA:chrX:39980256-39991281 forward strand                          | -1.56545 | -36.76616 | 1.01E-19 |
| 869222  | A_24_P390495   | CX3CL1    | Homo sapiens chemokine (C-X3-C motif) ligand 1 (CX3CL1 NM_002996       | -1.61899 | -41.5901  | 7.65E-23 |
| 1161067 | A_23_P146641   | TTYTY12   | Homo sapiens testis-specific transcript, Y-linked 12 (non-p NR_001551  | -1.62203 | -41.88262 | 2.27E-20 |
| 2316927 | A_33_P3221578  |           | PREDICTED: Homo sapiens FLJ45872 protein (FLJ45872), t XR_114214       | -1.62972 | -42.63082 | 2.23E-20 |
| 2313034 | A_33_P3303982  | UBTF1     | Homo sapiens upstream binding transcription factor, RNA p NM_001143975 | -1.64645 | -44.30507 | 1.24E-20 |
| 2332858 | A_33_P3261695  | LOC647310 | Homo sapiens testis expressed gene 22 (LOC647310), mRNA NM_001195082   | -1.65824 | -45.52351 | 1.93E-22 |
| 2317053 | A_33_P3236122  |           | Unknown                                                                | -1.68349 | -46.07733 | 1.00E-20 |
| 1137544 | A_23_P425681   | CCK       | Homo sapiens cholecystokinin (CCK), transcript variant 1, n NM_000729  | -1.68606 | -48.53609 | 1.93E-22 |
| 2313823 | A_33_P3754922  | RNU11     | BP873537 Sugano cDNA library, embryonal kidney Homo sa BP873537        | -1.70751 | -50.99257 | 1.41E-22 |
| 866683  | A_32_P54274    | DRD5      | Homo sapiens dopamine receptor D5 (DRD5), mRNA [NM_01 NM_000798        | -1.7391  | -54.83998 | 7.07E-23 |
| 881201  | A_24_P128713   |           | ankyrin repeat domain 44 [Source:HGNC Symbol;Acc:25259 AK097086        | -1.74131 | -55.12009 | 2.14E-21 |
| 2313161 | A_33_P3331150  |           | Human IG rearranged H-chain mRNA V-region, partial cds. L03830         | -1.74812 | -55.9916  | 1.71E-21 |
| 885170  | A_23_P355394   | STK32A    | Homo sapiens serine/threonine kinase 32A (STK32A), trans NM_145001     | -1.75271 | -56.58576 | 7.69E-22 |
| 2328230 | A_33_P3348395  |           | Uncharacterized protein ENSP00000372125 [Source:UniProtKB/Swiss-Prot   | -1.75821 | -57.30698 | 1.09E-21 |
| 2325685 | A_33_P3214670  | HK2       | Homo sapiens hexokinase 2 (HK2), mRNA [NM_000189]. NM_000189           | -1.90182 | -79.76683 | 2.24E-22 |
| 1155509 | A_24_P492083   |           | AF150244 Human mRNA from cd34+ stem cells Homo sapie AF150244          | -1.96759 | -92.80843 | 1.36E-22 |
| 1145348 | A_23_P82099    | NOX3      | Homo sapiens NADPH oxidase 3 (NOX3), mRNA [NM_01571 NM_015718          | -2       | -100      | 2.84E-23 |
| 1139895 | A_23_P304304   | ARSF      | Homo sapiens arylsulfatase F (ARSF), mRNA [NM_004042] NM_004042        | -2       | -100      | 5.05E-23 |
| 2313224 | A_33_P3403270  |           | coiled-coil domain containing 33 [Source:HGNC Symbol;Acc CN265765      | -2       | -100      | 6.09E-23 |
| 2313619 | A_19_P00805987 |           | lincRNA:chr18:53398227-53474402 reverse strand                         | -2       | -100      | 8.93E-23 |
| 2332992 | A_33_P3276386  |           | Unknown                                                                | -2       | -100      | 5.69E-23 |

Supplementary Table 4. List of genes expressed greater than 2.0 folds in *S. mutans* TW295 infection.

| Gene     | Accession number | Fold increase        |                          |                             |
|----------|------------------|----------------------|--------------------------|-----------------------------|
|          |                  | TW295 vs<br>TW295CND | TW295 vs<br>no infection | TW295CND vs<br>no infection |
| ADHFE1   | NM_144650        | 19.07                | 10.99                    | -                           |
| ANKMY1   | NM_017844        | 2.78                 | 2.30                     | -                           |
| ARHGAP9  | NM_032496        | 8.51                 | 3.35                     | -                           |
| ARHGEF38 | NM_017700        | 2.90                 | 3.47                     | -                           |
| ARNT2    | NM_14862         | 3.04                 | 2.96                     | -                           |
| ATP8B3   | NM_138813        | 3.95                 | 3.67                     | -                           |
| AURKC    | NM_001015878     | 3.07                 | 2.63                     | -                           |
| AWAT2    | NM_001002254     | 2.44                 | 3.96                     | -                           |
| BMP10    | NM_014482        | 6.14                 | 12.67                    | -                           |
| C1orf14  | NM_0.0933        | 7.34                 | 3.56                     | -                           |
| C21orf54 | NR_024102        | 100.00               | 100.00                   | -                           |
| C22orf43 | NM_016449        | 3.06                 | 2.56                     | -                           |
| C4orf40  | NM_214711        | 15.18                | 15.25                    | -                           |
| C8orf41  | NM_025115        | 2.04                 | 2.15                     | -                           |
| CAND1    | NM_018448        | 3.02                 | 3.09                     | -                           |
| CBLN4    | NM_080617        | 3.16                 | 3.55                     | -                           |
| CRMP1    | NM_001014809     | 2.16                 | 2.59                     | -                           |
| DEFB103A | NM_001081551     | 5.46                 | 5.60                     | -                           |
| DOC2A    | NM_003586        | 7.32                 | 6.40                     | -                           |
| EML5     | NM_183387        | 3.88                 | 3.22                     | -                           |
| ESX1     | NM_153448        | 6.63                 | 7.36                     | -                           |
| FAM178B  | NM_001122646     | 4.29                 | 6.46                     | -                           |
| FBXW12   | NM_207102        | 3.23                 | 2.07                     | -2.33                       |
| FLJ21408 | AK025061         | 4.29                 | 11.44                    | -                           |
| FLJ25363 | NM_001145553     | 2.01                 | 2.36                     | -                           |
| FLJ37505 | NR_033987        | 15.09                | 10.78                    | -                           |
| FOS      | NM_005252        | 6.96                 | 5.62                     | -                           |

Supplementary Table 4. Continued.

| Gene         | Accession number | Fold increase |              |              |
|--------------|------------------|---------------|--------------|--------------|
|              |                  | TW295 vs      | TW295 vs     | TW295CND vs  |
|              |                  | TW295CND      | no infection | no infection |
| GPR179       | NM_01004334      | 2.01          | 3.44         | -            |
| HAMP         | NM_021175        | 3.03          | 2.77         | -            |
| IL18RAP      | NM_003853        | 2.61          | 2.36         | -            |
| KCNAB2       | NM_003636        | 4.71          | 2.33         | -            |
| KIAA1239     | NM_001144990     | 8.83          | 2.66         | -            |
| KIAA1804     | NM_032435        | 2.46          | 2.30         | -            |
| LCE1E        | NM_178353        | 2.13          | 2.15         | -            |
| LLGL1        | NM_004140        | 3.94          | 3.85         | -            |
| LOC100128496 | CR738909         | 4.72          | 5.00         | -            |
| LOC100128942 | CD049182         | 39.65         | 39.40        | -            |
| LOC100129931 | NR_033828        | 2.65          | 2.24         | -            |
| LOC100130148 | NR_024560        | 9.19          | 9.08         | -            |
| LOC100130857 | AK097050         | 11.36         | 2.33         | -5.09        |
| LOC100131355 | AK124217         | 2.08          | 2.09         | -            |
| LOC100131479 | XM_001715121     | 2.83          | 2.26         | -            |
| LOC100132815 | AK056856         | 2.50          | 2.14         | -            |
| LOC284276    | NR_015417        | 5.41          | 4.32         | -            |
| LOC284440    | NR_026956        | 2.07          | 2.10         | -            |
| LOC729770    | XR_112442        | 3.17          | 3.38         | -            |
| LRRC2        | NM_024512        | 3.07          | 2.44         | -            |
| LY6G6E       | NR_024541        | 3.07          | 6.04         | -            |
| MFAP3L       | NM_021647        | 6.37          | 6.17         | -            |
| MPL          | NM_005373        | 4.73          | 4.66         | -            |
| NDOR1        | NM_001144026     | 3.62          | 3.59         | -            |
| NMUR1        | NM_006056        | 3.54          | 4.72         | -            |
| PCMTD1       | NM_052937        | 2.75          | 2.28         | -            |
| PCNX         | NM_014982        | 2.90          | 2.88         | -            |
| PEX5L        | NM_016559        | 100.00        | 100.00       | -            |

Supplementary Table 4. Continued.

| Gene         | Accession number | Fold increase |              |              |
|--------------|------------------|---------------|--------------|--------------|
|              |                  | TW295 vs      | TW295 vs     | TW295CND vs  |
|              |                  | TW295CND      | no infection | no infection |
| PFKFB2       | NM_006212        | 2.59          | 2.74         | -            |
| POFUT1       | NM_015352        | 2.26          | 2.12         | -            |
| POU1F1       | NM_000306        | 71.73         | 2.36         | -            |
| PTK2B        | NM_173174        | 2.14          | 2.33         | -            |
| QPRT         | NM_014298        | 2.25          | 2.66         | -            |
| RESP18       | NM_001007089     | 8.68          | 2.30         | -            |
| RREB1        | NM_001003700     | 2.09          | 2.15         | -            |
| SCARNA9L     | NR_023358        | 2.33          | 3.85         | -            |
| SCNN1D       | NM_001130413     | 5.21          | 5.00         | -            |
| SHOX         | NM_006883        | 3.53          | 39.40        | -            |
| SLC10A7      | NM_032128        | 3.13          | 2.24         | -            |
| SLC16A7      | NM_004731        | 3.00          | 9.08         | -            |
| SOX 18       | NM_018419        | 4.06          | 2.33         | -            |
| SOX30        | NM_178424        | 2.70          | 2.09         | -            |
| SPDYE3       | NM_001004351     | 3.05          | 2.26         | -            |
| TDGF1        | NM_003212        | 2.59          | 2.14         | -            |
| TMED7-T1CAM2 | NM_001164469     | 2.22          | 4.32         | -            |
| TMEM201      | NM_001130924     | 2.49          | 2.10         | -            |
| TRH          | NM_007117        | 3.09          | 3.38         | -            |
| TTY18        | NR_001550        | 8.75          | 2.44         | -            |
| VAX2         | NM_012476        | 2.76          | 6.04         | -            |
| VGLL3        | NM_016206        | 2.58          | 6.17         | -            |
| WFDC5        | NM_145652        | 4.23          | 4.66         | -            |
| ZNF208       | NM_007153        | 3.74          | 3.59         | -            |
| ZNF676       | NM_001001411     | 2.20          | 4.72         | -            |
| ZNF737       | NM_001159293     | 2.07          | 2.28         | -            |
| ZNF880       | NM_001145434     | 2.22          | 2.88         | -            |

Supplementary Table 5. Primers used in the RT-PCR assays.

| Gene            | Primer     | Sequence                                | Size (bp) |
|-----------------|------------|-----------------------------------------|-----------|
| <i>ARHGEF38</i> | ARHGEF38-F | TGT CAT TGT TGG AAG AGG CC              | 240       |
|                 | ARHGEF38-R | TGA GAG GAG ATG GGA ATC AT              |           |
| <i>ARHGAP9</i>  | ARHGAP9-F  | TGG ACC AAC CCT GTT TCG GC              | 240       |
|                 | ARHGAP9-F  | AAG TCA CAC TCA TGA AGA TA              |           |
| <i>GPR179</i>   | GPR179-F   | CTG ACC CGT TCT CGG AGC ACC TAC AGA GAG | 300       |
|                 | GPR179-R   | CTC AGC TTT CCG TTC CCC TAG ACC CTG GGT |           |
| GAPDH           | GAPDH-F    | GGA GTC AAC GGA TTT GGT CGT ATT G       | 180       |
|                 | GAPDH-R    | CTT CCC GTT CTC AGC CTT GAC GGT G       |           |

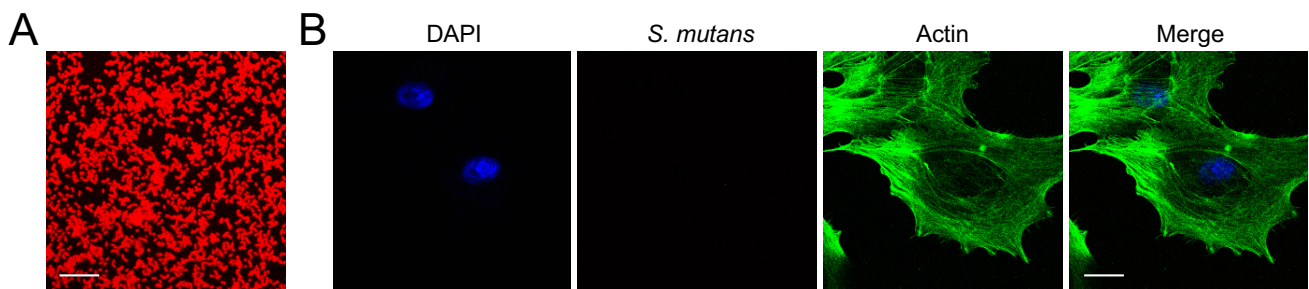

**Supplementary Figure 1** Representative confocal laser scanning microscopic images of *S. mutans* MT8148 (CBP-negative) and MT8148 infecting HUVECs. (A) Representative confocal laser scanning microscopic images of MT8148. Bacteria cells are stained red (anti-*S. mutans*-Alexa Fluor 555). Scale bar, 10  $\mu$ m. (B) Representative confocal laser scanning microscopic images of MT8148 infecting HUVECs. Nuclei are stained blue (DAPI), bacteria cells are stained red (anti-*S. mutans*-Alexa Fluor 555), and actin filaments are stained green (phalloidin-Alexa Fluor 448). Scale bar, 10  $\mu$ m. All confocal laser scanning microscope images were taken using LSM510.

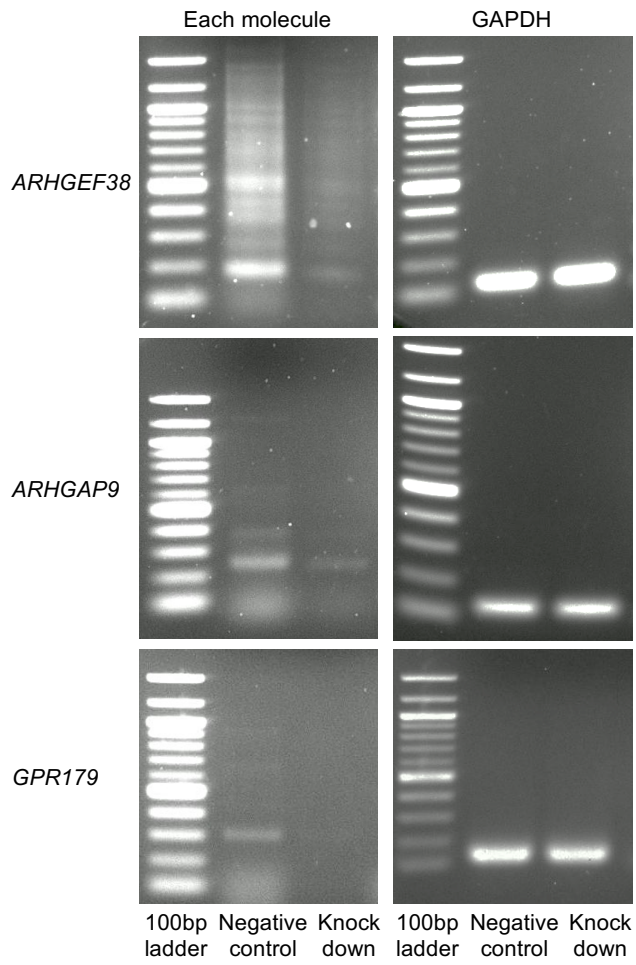

**Supplementary Figure 2** RT-PCR analysis of HUVECs transfected with siRNAs targeting *ARHGAP9*, *ARHGEF38*, and *GPR179*. GAPDH mRNA expression was analyzed as an internal control.

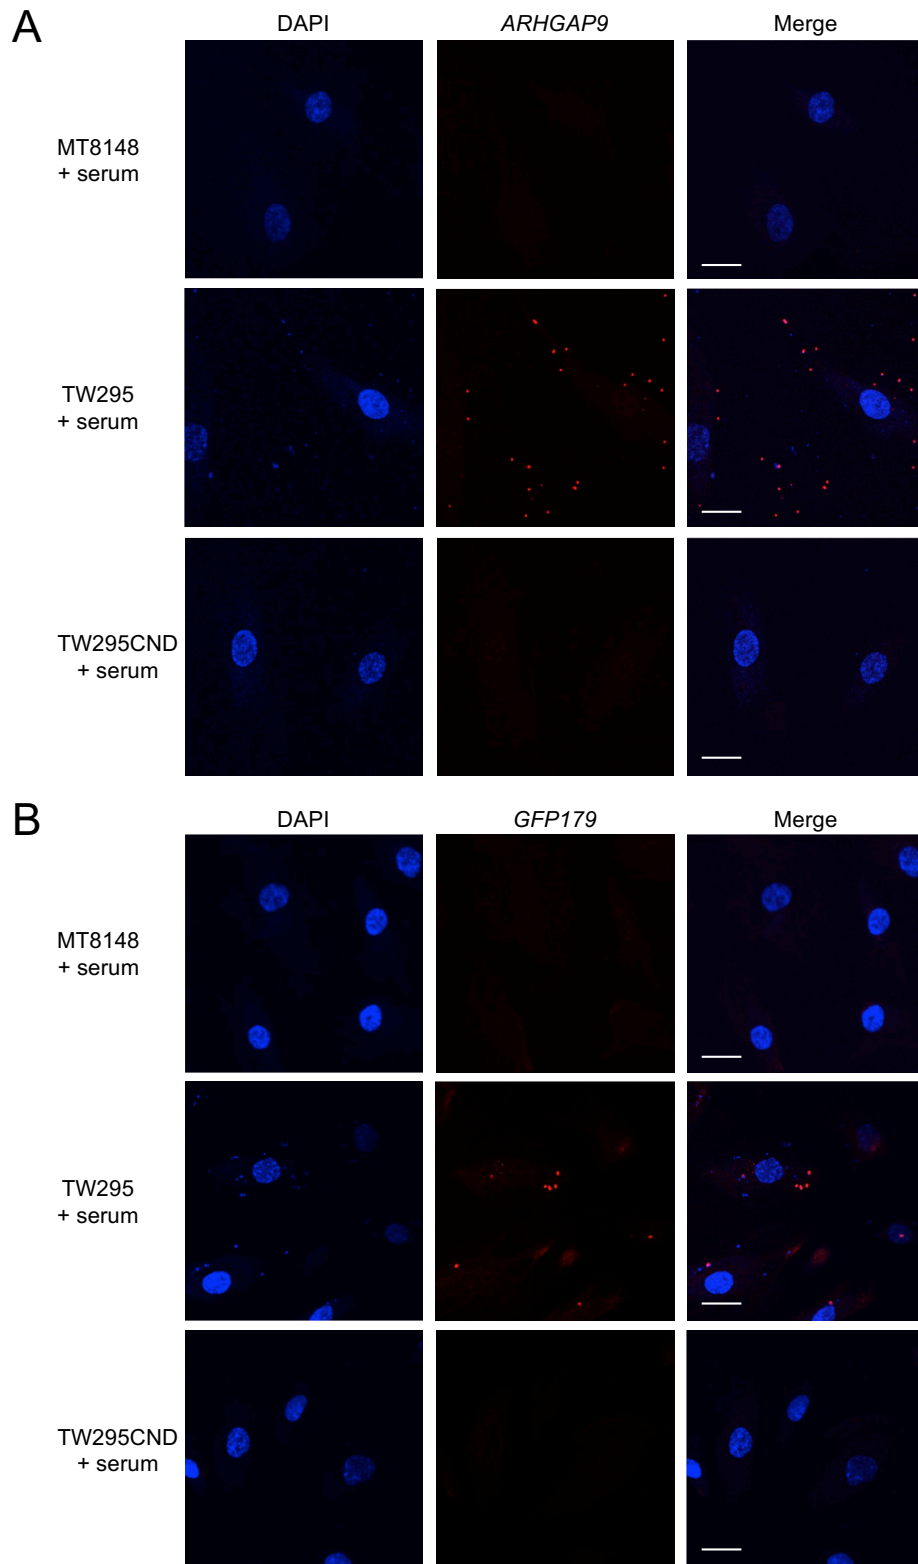

**Supplementary Figure 3** Representative confocal laser scanning microscopic images of *S. mutans* invading HUVECs. Nuclei are stained blue; *ARHGAP9* (A) and *GFP179* (B) are stained red. Bar; 10  $\mu$ m. All confocal laser scanning microscope images were taken using LSM510.



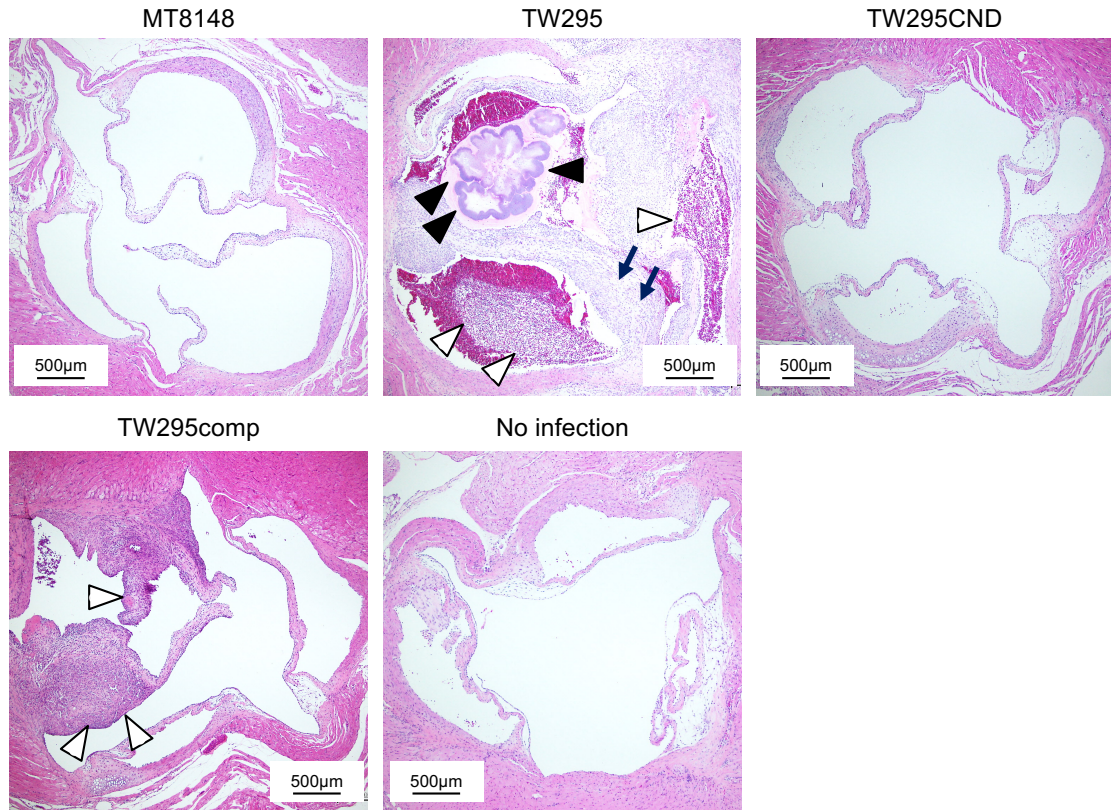

**Supplementary Figure 4** Representative histopathological images following hematoxylin-eosin staining of tissue sections of extirpated hearts from rats infected with *S. mutans*. White arrowheads indicate infiltration of inflammatory cells and black arrowheads indicate fibrin-like deposition. Black arrows indicate hypertrophy of the endocardium.
